# Supplementary material for: Systematic Analysis of RNA Regulatory Network in Rat Brain after Ischemic Stroke
Source: Hindawi journal article supplement (doi:10.1155/2018/8354350), 2018-01-01

### Empirical and theoretical den

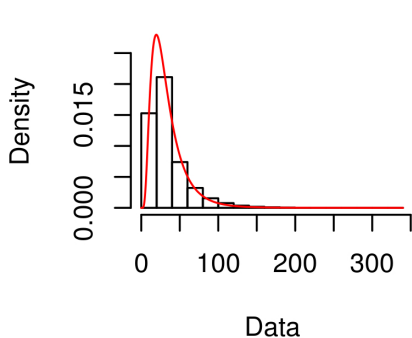

### Q-Q plot

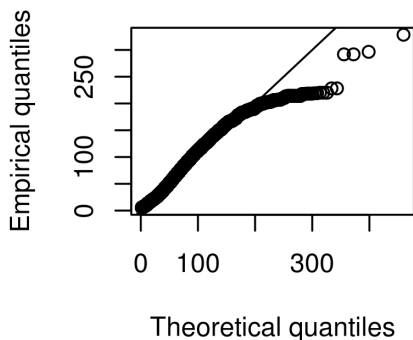

### Empirical and theoretical CDF

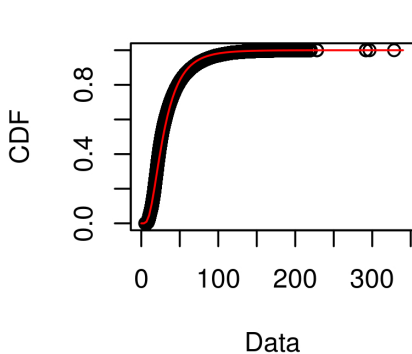

### P-P plot

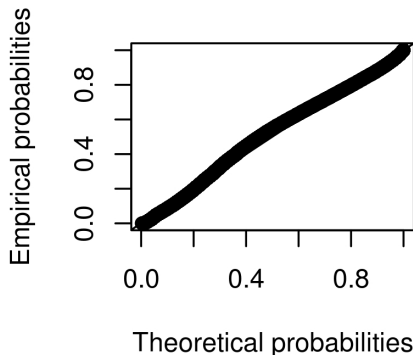

Supplement: f13 [file 8354350.f13.pdf]
