# Supplementary material for: Systematic Analysis of RNA Regulatory Network in Rat Brain after Ischemic Stroke
Source: Hindawi journal article supplement (doi:10.1155/2018/8354350), 2018-01-01

A

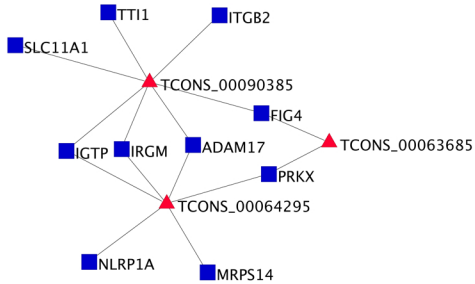

B

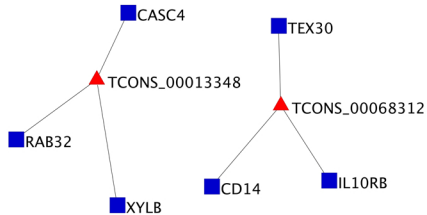

Supplement: f15 [file 8354350.f15.pdf]
