# Supplementary material for: Systematic Analysis of RNA Regulatory Network in Rat Brain after Ischemic Stroke
Source: Biomed Res Int. 2018 Jan 8;2018:8354350. doi: 10.1155/2018/8354350 (PMC5817225; doi:10.1155/2018/8354350)
Supplement: Supplementary 1 — Table S1: novo lncrna_BMRI_2116963. [file 8354350.f1.xlsx]

## Sheet: Table S1. Novo lncRNA
chrom	chromStart	chromEnd	name	score	strand	thickStart	thickEnd	itemRgb	blockCount	blockSizes	blockStarts
chr1	46084773	46220320	TCONS_00012759	1000	+	46220320	46220320	0	4	61,180,109,275,	0,63832,69044,135272,
chr1	118466090	118650522	TCONS_00006334	1000	+	118650522	118650522	0	5	649,144,154,13,22,	0,996,1847,53640,184410,
chr1	118466090	118523185	TCONS_00012087	1000	+	118523185	118523185	0	5	649,144,154,97,37,	0,996,1847,54503,57058,
chr1	118466090	118519797	TCONS_00006332	1000	+	118519797	118519797	0	4	649,144,154,67,	0,996,1847,53640,
chr1	118466209	118692901	TCONS_00005053	1000	+	118692901	118692901	0	7	530,144,154,13,27,54,11,	0,877,1728,53521,184291,213225,226681,
chr1	118466209	118659232	TCONS_00012892	1000	+	118659232	118659232	0	4	530,144,154,43,	0,877,1728,192980,
chr1	118466209	118527846	TCONS_00005051	1000	+	118527846	118527846	0	5	530,144,154,97,40,	0,877,1728,54384,61597,
chr1	118466209	118527846	TCONS_00005052	1000	+	118527846	118527846	0	5	530,144,154,97,40,	0,877,1728,53521,61597,
chr1	118467879	118519737	TCONS_00011213	1000	+	118519737	118519737	0	2	212,7,	0,51851,
chr1	118467880	118692946	TCONS_00007499	1000	+	118692946	118692946	0	5	211,13,27,58,56,	0,52713,182620,211554,225010,
chr1	118467937	118499768	TCONS_00008532	1000	+	118499768	118499768	0	3	154,94,66,	0,16479,31765,
chr1	119469791	119758493	TCONS_00006877	1000	-	119758493	119758493	0	3	213,142,33,	0,61632,288669,
chr1	119469862	119652757	TCONS_00008001	1000	-	119652757	119652757	0	3	142,142,24,	0,61561,182871,
chr1	119471040	119758493	TCONS_00013304	1000	-	119758493	119758493	0	3	63,142,33,	0,60383,287420,
chr1	119475627	119652744	TCONS_00014155	1000	-	119652744	119652744	0	4	55,142,44,11,	0,55796,143503,177106,
chr1	119531222	119758493	TCONS_00005711	1000	-	119758493	119758493	0	2	343,33,	0,227238,
chr1	119531222	119652832	TCONS_00005710	1000	-	119652832	119652832	0	2	343,99,	0,121511,
chr1	119531232	119603515	TCONS_00012462	1000	-	119603515	119603515	0	3	333,224,20,	0,679,72263,
chr1	122440874	122759681	TCONS_00010376	1000	+	122759681	122759681	0	3	833,92,92,	0,52838,318715,
chr1	122493532	122759761	TCONS_00001004	1000	+	122759761	122759761	0	2	45,395,	0,265834,
chr1	231709088	231741629	TCONS_00010974	1000	-	231741629	231741629	0	2	1221,3867,	0,28674,
chr1	231709683	231764638	TCONS_00006020	1000	-	231764638	231764638	0	3	626,161,78,	0,49495,54877,
chr1	269467480	269485593	TCONS_00002168	1000	+	269485593	269485593	0	2	82,6374,	0,11739,
chr1	269467506	269485593	TCONS_00002169	1000	+	269485593	269485593	0	3	56,134,6374,	0,591,11713,
chr1	269468181	269485842	TCONS_00009714	1000	+	269485842	269485842	0	3	50,655,3273,	0,11038,14388,
chr1	269472880	269485684	TCONS_00012282	1000	+	269485684	269485684	0	2	52,6465,	0,6339,
chr1	11122203	11155353	TCONS_00000036	1000	+	11155353	11155353	0	2	351,1600,	0,31550,
chr1	11336592	11458676	TCONS_00008355	1000	+	11458676	11458676	0	7	151,79,87,142,50,103,20,	0,36270,56873,115431,116500,117931,122064,
chr1	18737625	18775654	TCONS_00013989	1000	-	18775654	18775654	0	4	190,146,116,227,	0,33747,34149,37802,
chr1	62503955	62576079	TCONS_00009378	1000	+	62576079	62576079	0	3	1491,91,72,	0,59182,72052,
chr1	67970663	68099725	TCONS_00006193	1000	+	68099725	68099725	0	7	166,86,198,313,66,91,22,	0,19276,34419,81780,82415,83418,129040,
chr1	67970692	68105967	TCONS_00007377	1000	+	68105967	68105967	0	6	137,313,66,91,87,125,	0,81751,82386,83389,129011,135150,
chr1	121986822	122086664	TCONS_00008005	1000	-	122086664	122086664	0	14	2784,40,404,74,137,61,98,83,106,146,61,109,41,406,	0,8972,9329,11425,36467,37689,45320,61307,61891,68412,79472,95315,99115,99436,
chr1	122139793	122186804	TCONS_00014158	1000	-	122186804	122186804	0	4	1980,1368,40,288,	0,2030,7662,46723,
chr1	122769278	123346258	TCONS_00006336	1000	+	123346258	123346258	0	4	745,42,165,422,	0,151795,436433,576558,
chr1	122770304	123119701	TCONS_00009504	1000	+	123119701	123119701	0	3	63,106,342,	0,151110,349055,
chr1	122814540	123205866	TCONS_00012893	1000	+	123205866	123205866	0	3	19,165,397,	0,106156,390929,
chr1	122870052	122952702	TCONS_00001005	1000	+	122952702	122952702	0	2	64,621,	0,82029,
chr1	122918539	123118222	TCONS_00011214	1000	+	123118222	123118222	0	2	1788,6,	0,199677,
chr1	122919249	123205688	TCONS_00007504	1000	+	123205688	123205688	0	2	1612,219,	0,286220,
chr1	122920868	123119581	TCONS_00007505	1000	+	123119581	123119581	0	2	652,222,	0,198491,
chr1	123115243	123344876	TCONS_00001007	1000	+	123344876	123344876	0	2	20,2929,	0,226704,
chr1	123116138	123344876	TCONS_00011216	1000	+	123344876	123344876	0	2	17,2042,	0,226696,
chr1	123183217	123344876	TCONS_00001011	1000	+	123344876	123344876	0	2	12,2929,	0,158730,
chr1	123198297	123346253	TCONS_00011217	1000	+	123346253	123346253	0	2	386,4306,	0,143650,
chr1	123205197	123390657	TCONS_00005061	1000	+	123390657	123390657	0	3	679,154,55,	0,140639,185405,
chr1	123205197	123346258	TCONS_00006339	1000	+	123346258	123346258	0	2	679,422,	0,140639,
chr1	123295250	123344855	TCONS_00001013	1000	+	123344855	123344855	0	2	180,3373,	0,46232,
chr1	125161827	125416054	TCONS_00006887	1000	-	125416054	125416054	0	6	54,55,93,109,142,108,	0,201072,202948,204044,242104,254119,
chr1	125161827	125416054	TCONS_00013313	1000	-	125416054	125416054	0	6	54,55,93,109,92,108,	0,201072,202948,204044,242154,254119,
chr1	132545571	132678705	TCONS_00006354	1000	+	132678705	132678705	0	9	617,572,173,105,43,155,216,259,511,	0,45352,46917,53601,60603,64643,65446,70164,132623,
chr1	132590332	132715477	TCONS_00001064	1000	+	132715477	132715477	0	8	1163,173,110,174,259,116,68,407,	0,2156,8840,15725,25403,56372,111815,124738,
chr1	132590901	132678329	TCONS_00013776	1000	+	132678329	132678329	0	7	594,173,110,174,221,259,135,	0,1587,8271,15156,20111,24834,87293,
chr1	132590901	132648232	TCONS_00013775	1000	+	132648232	132648232	0	6	594,110,174,259,116,39,	0,8271,15156,24834,55803,57292,
chr1	132590902	132678226	TCONS_00014524	1000	+	132678226	132678226	0	6	593,173,110,259,116,32,	0,1586,8270,24833,55802,87292,
chr1	132590902	132678226	TCONS_00014525	1000	+	132678226	132678226	0	8	593,110,57,156,216,259,116,32,	0,8270,15272,19312,20115,24833,55802,87292,
chr1	132590920	132678254	TCONS_00005073	1000	+	132678254	132678254	0	4	575,110,259,60,	0,8252,24815,87274,
chr1	132590920	132646764	TCONS_00005072	1000	+	132646764	132646764	0	7	575,110,174,155,216,259,60,	0,8252,15137,19294,20097,24815,55784,
chr1	132590924	132678373	TCONS_00009527	1000	+	132678373	132678373	0	8	571,110,174,155,216,259,116,179,	0,8248,15133,19290,20093,24811,55780,87270,
chr1	132590924	132678373	TCONS_00009529	1000	+	132678373	132678373	0	9	571,173,110,174,155,216,259,116,179,	0,1564,8248,15133,19290,20093,24811,55780,87270,
chr1	132590924	132678373	TCONS_00009528	1000	+	132678373	132678373	0	7	571,110,174,155,259,116,159,	0,8248,15133,19290,24811,55780,87290,
chr1	132590924	132659137	TCONS_00009526	1000	+	132659137	132659137	0	4	571,173,110,79,	0,1564,8248,68134,
chr1	140771031	140819872	TCONS_00012489	1000	-	140819872	140819872	0	7	130,114,136,200,173,135,110,	0,13324,13546,22237,40575,41616,48731,
chr1	202604186	202898864	TCONS_00005224	1000	+	202898864	202898864	0	2	67,720,	0,293958,
chr1	202663155	202921805	TCONS_00012178	1000	+	202921805	202921805	0	2	347,323,	0,258327,
chr1	202700647	202881179	TCONS_00011310	1000	+	202881179	202881179	0	2	368,1879,	0,178653,
chr1	202700671	202954192	TCONS_00012179	1000	+	202954192	202954192	0	2	344,424,	0,253097,
chr1	202703592	202899197	TCONS_00013858	1000	+	202899197	202899197	0	2	252,1543,	0,194062,
chr1	202767048	202899160	TCONS_00011311	1000	+	202899160	202899160	0	2	880,1665,	0,130447,
chr1	202767127	202954862	TCONS_00014597	1000	+	202954862	202954862	0	2	161,1284,	0,186451,
chr1	202767940	202899160	TCONS_00005226	1000	+	202899160	202899160	0	2	386,1270,	0,129950,
chr1	204329111	204399951	TCONS_00014966	1000	-	204399951	204399951	0	2	3724,39,	0,70801,
chr1	222799882	222858973	TCONS_00010930	1000	-	222858973	222858973	0	4	2161,1029,30,21,	0,6023,39377,59070,
chr1	222799968	222839237	TCONS_00013471	1000	-	222839237	222839237	0	2	2998,144,	0,39125,
chr1	222801322	222839279	TCONS_00005954	1000	-	222839279	222839279	0	3	576,1174,20,	0,4438,37937,
chr1	222802062	222858973	TCONS_00015001	1000	-	222858973	222858973	0	3	592,448,21,	0,4454,56890,
chr1	222805009	222839288	TCONS_00012611	1000	-	222839288	222839288	0	2	1925,29,	0,34250,
chr1	222805465	222858973	TCONS_00010931	1000	-	222858973	222858973	0	2	1499,21,	0,53487,
chr1	226619938	226626459	TCONS_00014290	1000	-	226626459	226626459	0	3	25,165,622,	0,3520,5899,
chr1	284906596	284954562	TCONS_00002293	1000	+	284954562	284954562	0	2	101,2184,	0,45782,
chr1	9753997	9790583	TCONS_00004808	1000	+	9790583	9790583	0	4	1275,75,115,4222,	0,28264,28934,32364,
chr1	9754356	9790575	TCONS_00014389	1000	+	9790575	9790575	0	3	916,785,4214,	0,27905,32005,
chr1	9754361	9790600	TCONS_00008354	1000	+	9790600	9790600	0	4	1303,75,115,4239,	0,27900,28570,32000,
chr1	9755563	9790310	TCONS_00000030	1000	+	9790310	9790310	0	4	101,75,105,3949,	0,26698,27263,30798,
chr1	9755807	9790310	TCONS_00000031	1000	+	9790310	9790310	0	4	270,75,115,3949,	0,26454,27124,30554,
chr1	9781774	9787212	TCONS_00006137	1000	+	9787212	9787212	0	2	1272,851,	0,4587,
chr1	18628214	18631547	TCONS_00013988	1000	-	18631547	18631547	0	2	1205,1191,	0,2142,
chr1	18760805	18775616	TCONS_00005448	1000	-	18775616	18775616	0	4	390,56,116,189,	0,486,10969,14622,
chr1	18766941	18775649	TCONS_00007800	1000	-	18775649	18775649	0	4	76,146,116,222,	0,4431,4833,8486,
chr1	18771039	18775684	TCONS_00002408	1000	-	18775684	18775684	0	3	479,116,257,	0,735,4388,
chr1	18771666	18775648	TCONS_00010626	1000	-	18775648	18775648	0	2	224,221,	0,3761,
chr1	24707761	24736340	TCONS_00004837	1000	+	24736340	24736340	0	2	443,277,	0,28302,
chr1	40380052	40431274	TCONS_00013139	1000	-	40431274	40431274	0	4	720,87,134,18,	0,6861,7242,51204,
chr1	42931518	42935429	TCONS_00013636	1000	+	42935429	42935429	0	2	175,3220,	0,691,
chr1	45920989	45954205	TCONS_00000209	1000	+	45954205	45954205	0	3	608,179,2297,	0,1591,30919,
chr1	48301358	48306575	TCONS_00011968	1000	+	48306575	48306575	0	2	436,188,	0,5029,
chr1	52788420	52792849	TCONS_00009780	1000	-	52792849	52792849	0	2	142,1457,	0,2972,
chr1	52790816	52794934	TCONS_00012358	1000	-	52794934	52794934	0	2	1948,100,	0,4018,
chr1	53421706	53434056	TCONS_00000255	1000	+	53434056	53434056	0	2	1081,1000,	0,11350,
chr1	54215049	54223954	TCONS_00005490	1000	-	54223954	54223954	0	3	177,101,206,	0,7365,8699,
chr1	55080118	55120043	TCONS_00009372	1000	+	55120043	55120043	0	3	861,154,224,	0,20763,39701,
chr1	55080425	55083242	TCONS_00007356	1000	+	55083242	55083242	0	2	554,1009,	0,1808,
chr1	55642986	55654951	TCONS_00002593	1000	-	55654951	55654951	0	2	503,385,	0,11580,
chr1	55643376	55677093	TCONS_00010663	1000	-	55677093	55677093	0	3	113,163,61,	0,11190,33656,
chr1	58484145	58494086	TCONS_00000274	1000	+	58494086	58494086	0	3	236,152,258,	0,4735,9683,
chr1	58484254	58491103	TCONS_00004877	1000	+	58491103	58491103	0	3	127,152,923,	0,4626,5926,
chr1	58484274	58492953	TCONS_00014424	1000	+	58492953	58492953	0	3	107,152,22,	0,4606,8657,
chr1	58484278	58491048	TCONS_00004878	1000	+	58491048	58491048	0	2	103,2168,	0,4602,
chr1	62503955	62508329	TCONS_00000289	1000	+	62508329	62508329	0	2	1491,1100,	0,3274,
chr1	63889069	63890204	TCONS_00004894	1000	+	63890204	63890204	0	2	253,158,	0,977,
chr1	63889073	63893008	TCONS_00009381	1000	+	63893008	63893008	0	3	249,51,1870,	0,973,2065,
chr1	64958898	64966360	TCONS_00002648	1000	-	64966360	64966360	0	2	525,25,	0,7437,
chr1	66402296	66403856	TCONS_00013169	1000	-	66403856	66403856	0	2	259,716,	0,844,
chr1	67718055	67729656	TCONS_00006737	1000	-	67729656	67729656	0	2	2492,263,	0,11338,
chr1	67720411	67750339	TCONS_00002677	1000	-	67750339	67750339	0	3	136,256,224,	0,8982,29704,
chr1	67770234	67772774	TCONS_00013659	1000	+	67772774	67772774	0	3	323,120,926,	0,1106,1614,
chr1	68052442	68105967	TCONS_00011991	1000	+	68105967	68105967	0	5	314,66,91,87,125,	0,636,1639,47261,53400,
chr1	68099729	68106189	TCONS_00006194	1000	+	68106189	68106189	0	2	61,347,	0,6113,
chr1	68107203	68110974	TCONS_00000357	1000	+	68110974	68110974	0	2	2218,1087,	0,2684,
chr1	71330455	71336000	TCONS_00002701	1000	-	71336000	71336000	0	2	1693,247,	0,5298,
chr1	71337681	71341281	TCONS_00006739	1000	-	71341281	71341281	0	3	138,60,2090,	0,569,1510,
chr1	76061937	76066490	TCONS_00012791	1000	+	76066490	76066490	0	2	1436,994,	0,3559,
chr1	79158350	79160734	TCONS_00005552	1000	-	79160734	79160734	0	2	1600,655,	0,1729,
chr1	81043604	81044777	TCONS_00012023	1000	+	81044777	81044777	0	2	114,932,	0,241,
chr1	83287223	83288911	TCONS_00010711	1000	-	83288911	83288911	0	2	183,722,	0,966,
chr1	86729545	86731915	TCONS_00012414	1000	-	86731915	86731915	0	3	1320,191,155,	0,1886,2215,
chr1	95769509	95775444	TCONS_00012846	1000	+	95775444	95775444	0	2	180,743,	0,5192,
chr1	95775033	95779389	TCONS_00005004	1000	+	95779389	95779389	0	3	419,160,481,	0,599,3875,
chr1	105407581	105411747	TCONS_00012079	1000	+	105411747	105411747	0	2	2977,1088,	0,3078,
chr1	113597533	113602832	TCONS_00006329	1000	+	113602832	113602832	0	2	212,4732,	0,567,
chr1	115453296	115458758	TCONS_00014506	1000	+	115458758	115458758	0	2	28,674,	0,4788,
chr1	119531222	119532191	TCONS_00011641	1000	-	119532191	119532191	0	2	343,280,	0,689,
chr1	121987005	121997018	TCONS_00009022	1000	-	121997018	121997018	0	3	2601,40,867,	0,8789,9146,
chr1	122439750	122493718	TCONS_00012089	1000	+	122493718	122493718	0	2	1957,6,	0,53962,
chr1	122439758	122494027	TCONS_00006882	1000	-	122494027	122494027	0	2	2165,108,	0,54161,
chr1	124294801	124299072	TCONS_00003360	1000	-	124299072	124299072	0	3	528,139,1,	0,827,4270,
chr1	124294830	124296811	TCONS_00009917	1000	-	124296811	124296811	0	3	499,139,849,	0,798,1132,
chr1	124294897	124297146	TCONS_00014163	1000	-	124297146	124297146	0	4	432,139,33,641,	0,731,1065,1608,
chr1	124294897	124295956	TCONS_00014162	1000	-	124295956	124295956	0	2	432,328,	0,731,
chr1	125315059	125416034	TCONS_00006888	1000	-	125416034	125416034	0	6	167,55,93,109,92,88,	0,47840,49716,50812,88922,100887,
chr1	125360811	125416040	TCONS_00003363	1000	-	125416040	125416040	0	6	64,55,93,109,142,94,	0,2088,3964,5060,43120,55135,
chr1	127795768	127798096	TCONS_00001034	1000	+	127798096	127798096	0	2	448,1784,	0,544,
chr1	132546018	132616412	TCONS_00010391	1000	+	132616412	132616412	0	7	170,572,110,174,155,216,677,	0,44905,53154,60039,64196,64999,69717,
chr1	132546151	132615993	TCONS_00008548	1000	+	132615993	132615993	0	5	37,572,110,174,258,	0,44772,53021,59906,69584,
chr1	132546151	132615993	TCONS_00008549	1000	+	132615993	132615993	0	5	37,572,173,110,258,	0,44772,46337,53021,69584,
chr1	132546151	132614665	TCONS_00008547	1000	+	132614665	132614665	0	8	37,130,106,110,174,155,216,61,	0,44772,45238,53021,59906,64063,64866,68453,
chr1	132590121	132635502	TCONS_00007515	1000	+	132635502	132635502	0	7	1374,110,174,155,216,259,120,	0,9051,15936,20093,20896,25614,45261,
chr1	132590680	132610502	TCONS_00008550	1000	+	132610502	132610502	0	4	815,110,174,288,	0,8492,15377,19534,
chr1	132590901	132617949	TCONS_00013774	1000	+	132617949	132617949	0	7	594,105,57,155,216,259,184,	0,8271,15273,19313,20116,24834,26864,
chr1	132590902	132599419	TCONS_00014523	1000	+	132599419	132599419	0	3	593,173,247,	0,1586,8270,
chr1	132590922	132611244	TCONS_00012909	1000	+	132611244	132611244	0	5	573,110,174,155,227,	0,8250,15135,19292,20095,
chr1	132592631	132635671	TCONS_00005074	1000	+	132635671	132635671	0	7	30,110,174,155,216,259,289,	0,6541,13426,17583,18386,23104,42751,
chr1	136793288	136801499	TCONS_00011661	1000	-	136801499	136801499	0	2	674,3083,	0,5128,
chr1	140793226	140820910	TCONS_00008030	1000	-	140820910	140820910	0	5	242,173,135,111,237,	0,18380,19421,26536,27447,
chr1	140793320	140820869	TCONS_00003424	1000	-	140820869	140820869	0	6	148,292,173,131,111,196,	0,10303,18286,19331,26442,27353,
chr1	140803628	140820910	TCONS_00006910	1000	-	140820910	140820910	0	5	287,173,131,111,237,	0,7978,9023,16134,17045,
chr1	140803888	140820959	TCONS_00014892	1000	-	140820959	140820959	0	5	27,173,135,111,286,	0,7718,8759,15874,16785,
chr1	140807420	140820927	TCONS_00010801	1000	-	140820927	140820927	0	5	30,173,135,111,254,	0,4186,5227,12342,13253,
chr1	140812513	140821058	TCONS_00013324	1000	-	140821058	140821058	0	3	269,111,385,	0,7249,8160,
chr1	140851439	140868173	TCONS_00010802	1000	-	140868173	140868173	0	2	16585,48,	0,16686,
chr1	141545047	141547462	TCONS_00011228	1000	+	141547462	141547462	0	2	129,1979,	0,436,
chr1	141545828	141550995	TCONS_00007526	1000	+	141550995	141550995	0	2	140,2013,	0,3154,
chr1	141569941	141574473	TCONS_00007527	1000	+	141574473	141574473	0	2	4261,139,	0,4393,
chr1	142185920	142191181	TCONS_00007530	1000	+	142191181	142191181	0	2	250,1266,	0,3995,
chr1	142185961	142202923	TCONS_00011232	1000	+	142202923	142202923	0	3	209,1469,2477,	0,3954,14485,
chr1	142222183	142243564	TCONS_00001089	1000	+	142243564	142243564	0	2	145,2323,	0,19058,
chr1	142823045	142825625	TCONS_00012114	1000	+	142825625	142825625	0	2	444,2021,	0,559,
chr1	144784554	144800457	TCONS_00010820	1000	-	144800457	144800457	0	3	1757,94,33,	0,3364,15870,
chr1	146708377	146710272	TCONS_00013348	1000	-	146710272	146710272	0	2	813,890,	0,1005,
chr1	147069320	147154045	TCONS_00009067	1000	-	147154045	147154045	0	3	519,193,270,	0,81846,84455,
chr1	177253775	177271919	TCONS_00013393	1000	-	177271919	177271919	0	2	605,532,	0,17612,
chr1	177253775	177271319	TCONS_00005840	1000	-	177271319	177271319	0	2	605,1569,	0,15975,
chr1	177253775	177271319	TCONS_00007006	1000	-	177271319	177271319	0	3	605,206,1569,	0,15662,15975,
chr1	177253777	177288746	TCONS_00014225	1000	-	177288746	177288746	0	2	603,73,	0,34896,
chr1	177253777	177271381	TCONS_00009992	1000	-	177271381	177271381	0	2	603,27,	0,17577,
chr1	181764963	181766473	TCONS_00012966	1000	+	181766473	181766473	0	2	212,1206,	0,304,
chr1	200225659	200244828	TCONS_00012991	1000	+	200244828	200244828	0	2	822,595,	0,18574,
chr1	200226096	200244964	TCONS_00009600	1000	+	200244964	200244964	0	3	385,279,402,	0,18137,18466,
chr1	201127729	201181429	TCONS_00003887	1000	-	201181429	201181429	0	4	56,37,53,2072,	0,2465,2842,51628,
chr1	201186648	201190647	TCONS_00010014	1000	-	201190647	201190647	0	2	2644,579,	0,3420,
chr1	201187858	201191468	TCONS_00008124	1000	-	201191468	201191468	0	2	2311,62,	0,3548,
chr1	201286137	201290487	TCONS_00013420	1000	-	201290487	201290487	0	2	1010,3121,	0,1229,
chr1	202850912	202899168	TCONS_00008636	1000	+	202899168	202899168	0	2	218,2018,	0,46238,
chr1	202879276	202899174	TCONS_00007621	1000	+	202899174	202899174	0	2	1607,517,	0,19381,
chr1	202879809	202899197	TCONS_00013860	1000	+	202899197	202899197	0	2	1344,288,	0,19100,
chr1	206194671	206204524	TCONS_00012195	1000	+	206204524	206204524	0	2	234,276,	0,9577,
chr1	206926602	206928787	TCONS_00007072	1000	-	206928787	206928787	0	2	178,1569,	0,616,
chr1	208992991	208999745	TCONS_00014625	1000	+	208999745	208999745	0	2	4578,800,	0,5954,
chr1	221522989	221524805	TCONS_00008181	1000	-	221524805	221524805	0	2	1251,343,	0,1473,
chr1	221806363	221854361	TCONS_00004114	1000	-	221854361	221854361	0	2	218,42853,	0,5145,
chr1	221811174	221837619	TCONS_00012608	1000	-	221837619	221837619	0	3	10381,87,4545,	0,11328,21900,
chr1	221816981	221820951	TCONS_00013468	1000	-	221820951	221820951	0	2	150,3770,	0,200,
chr1	222799881	222806363	TCONS_00014998	1000	-	222806363	222806363	0	2	2162,458,	0,6024,
chr1	222799881	222806363	TCONS_00014999	1000	-	222806363	222806363	0	3	95,634,627,	0,1359,5855,
chr1	222799882	222812350	TCONS_00010929	1000	-	222812350	222812350	0	4	94,753,1109,197,	0,1358,5973,12271,
chr1	222799964	222810523	TCONS_00012610	1000	-	222810523	222810523	0	2	3136,26,	0,10533,
chr1	222799974	222806356	TCONS_00011799	1000	-	222806356	222806356	0	2	1900,620,	0,5762,
chr1	222802062	222810518	TCONS_00015000	1000	-	222810518	222810518	0	3	592,448,21,	0,4454,8435,
chr1	222802107	222810527	TCONS_00005955	1000	-	222810527	222810527	0	3	746,249,30,	0,4608,8390,
chr1	222803028	222806356	TCONS_00008187	1000	-	222806356	222806356	0	2	72,1274,	0,2054,
chr1	222805009	222810525	TCONS_00008188	1000	-	222810525	222810525	0	2	1955,28,	0,5488,
chr1	222805022	222811231	TCONS_00013472	1000	-	222811231	222811231	0	2	1934,763,	0,5446,
chr1	223035930	223042254	TCONS_00004139	1000	-	223042254	223042254	0	3	3684,159,106,	0,4424,6218,
chr1	223037593	223042264	TCONS_00007126	1000	-	223042264	223042264	0	3	2017,159,116,	0,2761,4555,
chr1	223038544	223042909	TCONS_00008190	1000	-	223042909	223042909	0	2	1969,761,	0,3604,
chr1	223038578	223040880	TCONS_00008189	1000	-	223040880	223040880	0	2	1036,526,	0,1776,
chr1	226293011	226295153	TCONS_00008212	1000	-	226295153	226295153	0	2	1707,76,	0,2066,
chr1	227205643	227209063	TCONS_00010094	1000	-	227209063	227209063	0	2	1177,1594,	0,1826,
chr1	227205643	227209063	TCONS_00010095	1000	-	227209063	227209063	0	2	2743,352,	0,3068,
chr1	227828056	227844278	TCONS_00011365	1000	+	227844278	227844278	0	3	105,119,2477,	0,12738,13745,
chr1	231738861	231741959	TCONS_00012653	1000	-	231741959	231741959	0	2	1005,1207,	0,1891,
chr1	231738964	231740632	TCONS_00004367	1000	-	231740632	231740632	0	2	62,857,	0,811,
chr1	231750501	231759200	TCONS_00011854	1000	-	231759200	231759200	0	2	2417,22,	0,8677,
chr1	233058505	233060126	TCONS_00008733	1000	+	233060126	233060126	0	2	751,820,	0,801,
chr1	262537515	262539214	TCONS_00004587	1000	-	262539214	262539214	0	2	652,293,	0,1406,
chr1	262537711	262548309	TCONS_00015075	1000	-	262548309	262548309	0	2	456,29,	0,10569,
chr1	269467484	269481984	TCONS_00009713	1000	+	269481984	269481984	0	4	78,134,655,775,	0,613,11735,13725,
chr1	269478170	269481881	TCONS_00013095	1000	+	269481881	269481881	0	2	52,2662,	0,1049,
chr1	269479253	269482240	TCONS_00006613	1000	+	269482240	269482240	0	2	2136,37,	0,2950,
chr1	272471355	272475946	TCONS_00004690	1000	-	272475946	272475946	0	4	413,228,221,327,	0,1932,2920,4264,
chr1	272471486	272475947	TCONS_00011043	1000	-	272475947	272475947	0	4	278,228,221,328,	0,1801,2789,4133,
chr1	272519641	272520744	TCONS_00013580	1000	-	272520744	272520744	0	2	900,64,	0,1039,
chr1	281454068	281460030	TCONS_00004744	1000	-	281460030	281460030	0	2	1525,1842,	0,4120,
chr1	281454068	281460030	TCONS_00004745	1000	-	281460030	281460030	0	3	1525,262,481,	0,4120,5481,
chr1	281454148	281460413	TCONS_00007285	1000	-	281460413	281460413	0	3	1445,179,864,	0,4040,5401,
chr1	281454900	281461316	TCONS_00008342	1000	-	281461316	281461316	0	3	693,73,1767,	0,3288,4649,
chr1	284920739	284937506	TCONS_00007781	1000	+	284937506	284937506	0	2	1426,77,	0,16690,
chr1	284962077	284989411	TCONS_00008794	1000	+	284989411	284989411	0	2	136,2674,	0,24660,
chr1	284962185	284989411	TCONS_00012306	1000	+	284989411	284989411	0	2	28,5128,	0,22098,
chr1	285801434	285816884	TCONS_00014717	1000	+	285816884	285816884	0	4	534,307,138,102,	0,14589,15105,15348,
chr1	285801946	285817732	TCONS_00013113	1000	+	285817732	285817732	0	7	22,170,309,138,249,113,302,	0,2582,14075,14593,14836,15207,15484,
chr2	167737980	167795641	TCONS_00059726	1000	+	167795641	167795641	0	4	89,82,79,1260,	0,383,55006,56401,
chr2	121518303	121892618	TCONS_00058843	1000	-	121892618	121892618	0	4	46,107,91,115,	0,163254,166009,374200,
chr2	140230782	140596821	TCONS_00059702	1000	+	140596821	140596821	0	3	242,66,2931,	0,101722,363108,
chr2	140230932	140548617	TCONS_00061636	1000	+	140548617	140548617	0	3	92,66,48,	0,101572,317637,
chr2	204449697	204559029	TCONS_00061910	1000	-	204559029	204559029	0	3	370,122,280,	0,35900,109052,
chr2	126754	412880	TCONS_00056489	1000	-	412880	412880	0	3	345,32,125,	0,7061,286001,
chr2	126772	412893	TCONS_00058120	1000	-	412893	412893	0	2	359,138,	0,285983,
chr2	126942	134310	TCONS_00059342	1000	-	134310	134310	0	2	157,495,	0,6873,
chr2	134825	412862	TCONS_00060819	1000	-	412862	412862	0	2	611,107,	0,277930,
chr2	44407204	44454578	TCONS_00055302	1000	+	44454578	44454578	0	5	323,141,132,332,2188,	0,40502,43859,44293,45186,
chr2	44407241	44460421	TCONS_00059644	1000	+	44460421	44460421	0	8	286,141,132,332,2098,44,53,42,	0,40465,43822,44256,45149,48162,49134,53138,
chr2	46867700	46940139	TCONS_00058491	1000	+	46940139	46940139	0	4	73,862,353,67,	0,243,3375,72372,
chr2	46921896	46940495	TCONS_00060628	1000	+	46940495	46940495	0	2	127,423,	0,18176,
chr2	50052114	50223662	TCONS_00057801	1000	+	50223662	50223662	0	8	43,85,79,137,129,75,106,275,	0,657,36076,84530,84825,91651,161811,171273,
chr2	50108197	50223660	TCONS_00060136	1000	+	50223660	50223660	0	7	45,93,137,129,75,106,273,	0,24990,28447,28742,35568,105728,115190,
chr2	50126017	50214101	TCONS_00062025	1000	+	50214101	50214101	0	5	35,137,129,75,176,	0,10627,10922,17748,87908,
chr2	50132608	50214025	TCONS_00062910	1000	+	50214025	50214025	0	5	676,137,129,75,100,	0,4036,4331,11157,81317,
chr2	50133183	50224821	TCONS_00060635	1000	+	50224821	50224821	0	8	97,137,129,75,106,298,157,33,	0,3461,3756,10582,80742,90204,91096,91605,
chr2	50133184	50224839	TCONS_00062026	1000	+	50224839	50224839	0	8	100,137,129,75,106,298,157,51,	0,3460,3755,10581,80741,90203,91095,91604,
chr2	51667168	51880075	TCONS_00063108	1000	-	51880075	51880075	0	9	501,128,143,191,609,79,174,91,275,	0,3719,26204,31049,32369,34141,105925,109272,212632,
chr2	51667174	51837051	TCONS_00062242	1000	-	51837051	51837051	0	9	495,128,143,191,609,79,174,91,647,	0,3713,26198,31043,32363,34135,105919,109266,169230,
chr2	51667174	51837051	TCONS_00062243	1000	-	51837051	51837051	0	10	495,128,143,191,609,79,174,91,84,647,	0,3713,26198,31043,32363,34135,105919,109266,165387,169230,
chr2	51667185	51880283	TCONS_00058787	1000	-	51880283	51880283	0	10	484,128,143,191,609,79,174,91,71,483,	0,3702,26187,31032,32352,34124,105908,109255,165376,212615,
chr2	51667190	51880050	TCONS_00062693	1000	-	51880050	51880050	0	7	479,128,143,191,609,79,250,	0,3697,26182,31027,32347,34119,212610,
chr2	51667196	51880288	TCONS_00056641	1000	-	51880288	51880288	0	11	473,128,143,191,609,79,174,91,84,1445,488,	0,3691,26176,31021,32341,34113,105897,109244,165365,169208,212604,
chr2	51667196	51880288	TCONS_00056642	1000	-	51880288	51880288	0	11	473,128,143,191,609,79,174,91,84,145,488,	0,3691,26176,31021,32341,34113,105897,109244,165365,169208,212604,
chr2	51698217	51879387	TCONS_00063109	1000	-	51879387	51879387	0	7	191,609,79,174,91,84,750,	0,1320,3092,74876,78223,134344,180420,
chr2	51701361	51834379	TCONS_00060851	1000	-	51834379	51834379	0	5	27,174,91,71,49,	0,71732,75079,131200,132969,
chr2	51768518	51879938	TCONS_00058168	1000	-	51879938	51879938	0	6	109,174,91,84,145,138,	0,4575,7922,64043,67886,111282,
chr2	51768518	51878729	TCONS_00058167	1000	-	51878729	51878729	0	6	109,174,91,84,1445,92,	0,4575,7922,64043,67886,110119,
chr2	51768593	51776534	TCONS_00060391	1000	-	51776534	51776534	0	3	34,174,94,	0,4500,7847,
chr2	51771833	51880050	TCONS_00062694	1000	-	51880050	51880050	0	4	165,174,91,250,	0,1260,4607,107967,
chr2	51773090	51880077	TCONS_00059374	1000	-	51880077	51880077	0	5	177,91,84,145,277,	0,3350,59471,63314,106710,
chr2	55910190	56111839	TCONS_00062249	1000	-	56111839	56111839	0	10	38,86,115,190,168,85,253,34,83,123,	0,12992,17102,69574,122176,125850,156150,160948,163492,201526,
chr2	55910190	56071245	TCONS_00062248	1000	-	56071245	56071245	0	8	38,86,115,190,168,85,253,107,	0,12992,17102,69574,122176,125850,156150,160948,
chr2	55910190	56051259	TCONS_00062247	1000	-	56051259	56051259	0	7	38,86,115,190,71,168,154,	0,12992,17102,69574,130276,139050,140915,
chr2	55910190	56034393	TCONS_00062246	1000	-	56034393	56034393	0	6	38,86,115,190,168,162,	0,12992,17102,69574,122176,124041,
chr2	55923002	56051277	TCONS_00056669	1000	-	56051277	56051277	0	6	266,115,190,71,168,172,	0,4290,56762,117464,126238,128103,
chr2	55958573	56051274	TCONS_00062697	1000	-	56051274	56051274	0	6	24,99,190,71,168,169,	0,2985,21191,81893,90667,92532,
chr2	56036042	56111906	TCONS_00058799	1000	-	56111906	56111906	0	6	83,253,34,83,101,190,	0,30298,35096,37640,38194,75674,
chr2	58835265	58923604	TCONS_00059900	1000	-	58923604	58923604	0	3	38,161,79,	0,60743,88260,
chr2	59202495	59294200	TCONS_00062919	1000	+	59294200	59294200	0	3	323,113,1364,	0,3417,90341,
chr2	59202616	59294200	TCONS_00059084	1000	+	59294200	59294200	0	2	202,1364,	0,90220,
chr2	71038182	71044576	TCONS_00059095	1000	+	71044576	71044576	0	2	1636,18,	0,6376,
chr2	71038266	71046674	TCONS_00055422	1000	+	71046674	71046674	0	2	1552,2118,	0,6290,
chr2	74027535	74062997	TCONS_00058510	1000	+	74062997	74062997	0	3	877,60,271,	0,3073,35191,
chr2	74028261	74069529	TCONS_00060155	1000	+	74069529	74069529	0	6	151,60,137,266,143,30,	0,2347,17676,34465,39086,41238,
chr2	74030480	74069853	TCONS_00062487	1000	+	74069853	74069853	0	4	188,266,143,354,	0,32246,36867,39019,
chr2	74045959	74069809	TCONS_00058511	1000	+	74069809	74069809	0	4	115,266,143,310,	0,16767,21388,23540,
chr2	74045985	74069657	TCONS_00059667	1000	+	74069657	74069657	0	3	89,266,158,	0,16741,23514,
chr2	74045985	74063773	TCONS_00059666	1000	+	74063773	74063773	0	2	89,1047,	0,16741,
chr2	77402243	77490145	TCONS_00062935	1000	+	77490145	77490145	0	5	317,116,348,255,559,	0,16936,85777,86453,87343,
chr2	77418274	77488731	TCONS_00059106	1000	+	77488731	77488731	0	3	1021,348,35,	0,69746,70422,
chr2	79428400	79431930	TCONS_00056768	1000	-	79431930	79431930	0	3	1566,171,127,	0,2487,3403,
chr2	79428518	79431951	TCONS_00058823	1000	-	79431951	79431951	0	3	1451,171,148,	0,2369,3285,
chr2	81902347	82054456	TCONS_00062045	1000	+	82054456	82054456	0	2	71,250,	0,151859,
chr2	81905256	82054451	TCONS_00062494	1000	+	82054451	82054451	0	2	25,245,	0,148950,
chr2	82025154	82054513	TCONS_00055477	1000	+	82054513	82054513	0	2	45,307,	0,29052,
chr2	82025286	82054508	TCONS_00058524	1000	+	82054508	82054508	0	2	46,302,	0,28920,
chr2	93389410	93647828	TCONS_00055507	1000	+	93647828	93647828	0	2	385,757,	0,257661,
chr2	93389506	93744943	TCONS_00062051	1000	+	93744943	93744943	0	4	289,383,85,137,	0,257565,302625,355300,
chr2	93390002	93647899	TCONS_00058530	1000	+	93647899	93647899	0	2	741,828,	0,257069,
chr2	93647784	93744943	TCONS_00062052	1000	+	93744943	93744943	0	3	819,85,137,	0,44347,97022,
chr2	93648295	93728507	TCONS_00062939	1000	+	93728507	93728507	0	4	308,85,67,4545,	0,43836,75116,75667,
chr2	93648341	93751155	TCONS_00055509	1000	+	93751155	93751155	0	4	262,85,80,2768,	0,43790,96465,100046,
chr2	113897933	113982940	TCONS_00055576	1000	+	113982940	113982940	0	3	450,59,1830,	0,49860,83177,
chr2	113897972	113948623	TCONS_00055575	1000	+	113948623	113948623	0	2	411,830,	0,49821,
chr2	121680976	121892956	TCONS_00060892	1000	-	121892956	121892956	0	4	180,107,91,453,	0,581,3336,211527,
chr2	121681234	121892722	TCONS_00056861	1000	-	121892722	121892722	0	3	430,91,219,	0,3078,211269,
chr2	121681369	121902724	TCONS_00062283	1000	-	121902724	121902724	0	4	295,91,116,28,	0,2943,211134,221327,
chr2	123856458	123877316	TCONS_00060181	1000	+	123877316	123877316	0	2	630,238,	0,20620,
chr2	123857031	123906608	TCONS_00060182	1000	+	123906608	123906608	0	3	57,767,309,	0,34233,49268,
chr2	126506415	126791787	TCONS_00058849	1000	-	126791787	126791787	0	11	941,110,551,117,40,182,118,81,222,101,101,	0,3780,3983,4640,5821,25208,53748,234152,283222,284233,285271,
chr2	126506415	126791787	TCONS_00058850	1000	-	126791787	126791787	0	11	941,110,146,117,40,182,118,81,222,101,101,	0,3780,4388,4640,5821,25208,53748,234152,283222,284233,285271,
chr2	126740606	126791939	TCONS_00062291	1000	-	126791939	126791939	0	4	42,222,101,253,	0,49031,50042,51080,
chr2	136823790	136842388	TCONS_00060682	1000	+	136842388	136842388	0	2	2424,1499,	0,17099,
chr2	140230944	140334754	TCONS_00057888	1000	+	140334754	140334754	0	2	80,2250,	0,101560,
chr2	167575003	167769249	TCONS_00062774	1000	-	167769249	167769249	0	4	2479,88,92,164,	0,27890,28209,194082,
chr2	167576217	167769336	TCONS_00059465	1000	-	167769336	167769336	0	2	1265,251,	0,192868,
chr2	167602258	167747941	TCONS_00061422	1000	-	167747941	167747941	0	3	723,92,61,	0,954,145622,
chr2	181003360	181016442	TCONS_00055812	1000	+	181016442	181016442	0	2	412,403,	0,12679,
chr2	181004659	181011839	TCONS_00062553	1000	+	181011839	181011839	0	3	1244,2612,5,	0,1500,7175,
chr2	181008892	181015078	TCONS_00061667	1000	+	181015078	181015078	0	2	468,2689,	0,3497,
chr2	181009288	181013836	TCONS_00055813	1000	+	181013836	181013836	0	2	543,956,	0,3592,
chr2	203784811	203910925	TCONS_00062336	1000	-	203910925	203910925	0	7	28,110,58,148,192,71,152,	0,12964,24605,27377,39663,123153,125962,
chr2	203794374	203824615	TCONS_00060003	1000	-	203824615	203824615	0	5	450,110,58,148,141,	0,3401,15042,17814,30100,
chr2	242267443	242482970	TCONS_00059010	1000	-	242482970	242482970	0	9	36,135,87,135,202,168,137,223,149,	0,51073,136738,137371,139855,141349,143036,214801,215378,
chr2	242318589	242410610	TCONS_00058404	1000	-	242410610	242410610	0	6	62,87,135,202,149,131,	0,85592,86225,88709,90203,91890,
chr2	242345541	242352143	TCONS_00061530	1000	-	242352143	242352143	0	3	1005,174,120,	0,1786,6482,
chr2	242345961	242410618	TCONS_00061022	1000	-	242410618	242410618	0	7	585,174,87,135,202,168,139,	0,1366,58220,58853,61337,62831,64518,
chr2	242346033	242482880	TCONS_00060074	1000	-	242482880	242482880	0	9	513,174,87,135,202,168,137,223,59,	0,1294,58148,58781,61265,62759,64446,136211,136788,
chr2	242346235	242410618	TCONS_00060568	1000	-	242410618	242410618	0	8	311,174,108,87,135,202,168,139,	0,1092,39715,57946,58579,61063,62557,64244,
chr2	242346253	242482686	TCONS_00059011	1000	-	242482686	242482686	0	9	293,271,108,87,135,202,168,137,442,	0,977,39697,57928,58561,61045,62539,64226,135991,
chr2	242403428	242484996	TCONS_00063245	1000	-	242484996	242484996	0	8	30,87,135,202,168,137,223,180,	0,753,1386,3870,5364,7051,78816,81388,
chr2	11347922	11357313	TCONS_00059866	1000	-	11357313	11357313	0	5	174,50,135,139,161,	0,2230,7942,8495,9230,
chr2	11349986	11357290	TCONS_00060823	1000	-	11357290	11357290	0	4	216,135,139,138,	0,5878,6431,7166,
chr2	11355811	11357320	TCONS_00059347	1000	-	11357320	11357320	0	3	188,139,168,	0,606,1341,
chr2	11355845	11357329	TCONS_00063078	1000	-	11357329	11357329	0	2	711,177,	0,1307,
chr2	12918027	12938183	TCONS_00055257	1000	+	12938183	12938183	0	4	348,89,1245,472,	0,16579,18322,19684,
chr2	12931648	12938248	TCONS_00062446	1000	+	12938248	12938248	0	4	203,89,168,537,	0,2958,4701,6063,
chr2	12931662	12937685	TCONS_00055258	1000	+	12937685	12937685	0	3	189,89,1336,	0,2944,4687,
chr2	12932083	12937558	TCONS_00062447	1000	+	12937558	12937558	0	3	126,89,1209,	0,2523,4266,
chr2	12936909	12938804	TCONS_00058476	1000	+	12938804	12938804	0	2	685,1093,	0,802,
chr2	20216161	20225426	TCONS_00056533	1000	-	20225426	20225426	0	2	1358,413,	0,8852,
chr2	44447684	44454442	TCONS_00060129	1000	+	44454442	44454442	0	4	163,132,332,2052,	0,3379,3813,4706,
chr2	44451042	44456755	TCONS_00061092	1000	+	44456755	44456755	0	5	153,332,2098,44,380,	0,455,1348,4361,5333,
chr2	46579455	46587819	TCONS_00059878	1000	-	46587819	46587819	0	2	1713,6473,	0,1891,
chr2	46866922	46871440	TCONS_00057793	1000	+	46871440	46871440	0	2	1883,365,	0,4153,
chr2	48576231	48577342	TCONS_00062463	1000	+	48577342	48577342	0	2	213,774,	0,337,
chr2	50132850	50146393	TCONS_00062474	1000	+	50146393	50146393	0	5	434,137,129,75,55,	0,3794,4089,10915,13488,
chr2	51666899	51701380	TCONS_00059372	1000	-	51701380	51701380	0	5	770,128,143,191,71,	0,3988,26473,31318,34410,
chr2	51666899	51701375	TCONS_00059371	1000	-	51701375	51701375	0	7	770,128,89,143,191,609,66,	0,3988,25021,26473,31318,32638,34410,
chr2	51698185	51701375	TCONS_00059373	1000	-	51701375	51701375	0	3	223,609,66,	0,1352,3124,
chr2	51836564	51873280	TCONS_00061818	1000	-	51873280	51873280	0	2	1285,128,	0,36588,
chr2	53179699	53183150	TCONS_00060395	1000	-	53183150	53183150	0	2	837,508,	0,2943,
chr2	53212803	53214405	TCONS_00058795	1000	-	53214405	53214405	0	2	229,1148,	0,454,
chr2	55978899	56051259	TCONS_00062250	1000	-	56051259	56051259	0	7	91,190,168,85,71,168,154,	0,865,53467,57141,61567,70341,72206,
chr2	55978916	56051275	TCONS_00058179	1000	-	56051275	56051275	0	5	74,190,71,168,170,	0,848,61550,70324,72189,
chr2	55978916	56051275	TCONS_00060857	1000	-	56051275	56051275	0	4	74,190,168,170,	0,848,70324,72189,
chr2	55978949	56034396	TCONS_00062698	1000	-	56034396	56034396	0	4	41,190,168,165,	0,815,53417,55282,
chr2	55979377	56034401	TCONS_00060858	1000	-	56034401	56034401	0	3	577,168,170,	0,52989,54854,
chr2	55979437	56051277	TCONS_00056670	1000	-	56051277	56051277	0	5	517,54,71,168,172,	0,26497,61029,69803,71668,
chr2	55979487	56051271	TCONS_00058797	1000	-	56051271	56051271	0	4	467,71,168,166,	0,60979,69753,71618,
chr2	56036048	56051274	TCONS_00056671	1000	-	56051274	56051274	0	4	77,71,168,169,	0,4418,13192,15057,
chr2	58380777	58390754	TCONS_00061825	1000	-	58390754	58390754	0	4	3287,154,224,90,	0,4953,5608,9887,
chr2	58380777	58385073	TCONS_00061360	1000	-	58385073	58385073	0	2	2298,1913,	0,2383,
chr2	58382211	58384286	TCONS_00060863	1000	-	58384286	58384286	0	2	1010,713,	0,1362,
chr2	58891625	58923606	TCONS_00059384	1000	-	58923606	58923606	0	3	232,161,81,	0,4383,31900,
chr2	58891681	58923589	TCONS_00060865	1000	-	58923589	58923589	0	3	484,161,64,	0,4327,31844,
chr2	58891681	58918723	TCONS_00060864	1000	-	58918723	58918723	0	3	484,161,266,	0,4327,26776,
chr2	58891784	58923578	TCONS_00056682	1000	-	58923578	58923578	0	4	73,87,161,53,	0,294,4224,31741,
chr2	58895976	58923859	TCONS_00058184	1000	-	58923859	58923859	0	2	193,334,	0,27549,
chr2	59202152	59206073	TCONS_00057808	1000	+	59206073	59206073	0	2	666,165,	0,3756,
chr2	71196783	71198312	TCONS_00057827	1000	+	71198312	71198312	0	2	720,188,	0,1341,
chr2	73990303	74029979	TCONS_00059665	1000	+	74029979	74029979	0	3	235,154,711,	0,37955,38965,
chr2	74028268	74038277	TCONS_00061589	1000	+	74038277	74038277	0	4	144,60,63,136,	0,2340,6963,9873,
chr2	74062708	74069805	TCONS_00057832	1000	+	74069805	74069805	0	3	284,143,306,	0,4639,6791,
chr2	74066454	74069809	TCONS_00058512	1000	+	74069809	74069809	0	2	1036,310,	0,3045,
chr2	79148516	79158613	TCONS_00061131	1000	+	79158613	79158613	0	3	2433,826,6638,	0,2523,3459,
chr2	79151838	79152511	TCONS_00057841	1000	+	79152511	79152511	0	2	27,541,	0,132,
chr2	93389506	93403937	TCONS_00062050	1000	+	93403937	93403937	0	3	289,126,1503,	0,11272,12928,
chr2	93398551	93401921	TCONS_00062503	1000	+	93401921	93401921	0	2	1443,1143,	0,2227,
chr2	93648097	93692793	TCONS_00055508	1000	+	93692793	93692793	0	2	506,662,	0,44034,
chr2	93743039	93751155	TCONS_00055510	1000	+	93751155	93751155	0	2	1847,2768,	0,5348,
chr2	95990221	96032483	TCONS_00056796	1000	-	96032483	96032483	0	3	2890,404,419,	0,5237,41843,
chr2	95990221	96032483	TCONS_00056797	1000	-	96032483	96032483	0	2	5641,419,	0,41843,
chr2	95990221	96030783	TCONS_00056795	1000	-	96030783	96030783	0	2	5641,151,	0,40411,
chr2	95990537	96032413	TCONS_00062272	1000	-	96032413	96032413	0	3	5325,38,349,	0,13837,41527,
chr2	105046024	105049249	TCONS_00056815	1000	-	105049249	105049249	0	2	310,328,	0,2897,
chr2	118361115	118448559	TCONS_00055590	1000	+	118448559	118448559	0	3	49,134,989,	0,8496,86455,
chr2	118369608	118448666	TCONS_00059686	1000	+	118448666	118448666	0	2	137,1096,	0,77962,
chr2	123906151	123922960	TCONS_00060670	1000	+	123922960	123922960	0	2	466,251,	0,16558,
chr2	123922808	123951521	TCONS_00060671	1000	+	123951521	123951521	0	4	23,147,164,153,	0,11751,25335,28560,
chr2	123934305	123967031	TCONS_00055600	1000	+	123967031	123967031	0	5	401,164,173,69,265,	0,13838,17063,32163,32461,
chr2	123934554	123951822	TCONS_00059688	1000	+	123951822	123951822	0	3	152,164,454,	0,13589,16814,
chr2	123934586	123965101	TCONS_00062945	1000	+	123965101	123965101	0	4	120,164,173,107,	0,13557,16782,30408,
chr2	123938120	123951822	TCONS_00058542	1000	+	123951822	123951822	0	3	128,164,454,	0,10023,13248,
chr2	123938128	123965101	TCONS_00062946	1000	+	123965101	123965101	0	4	120,164,173,107,	0,10015,13240,26866,
chr2	126503052	126517109	TCONS_00056879	1000	-	126517109	126517109	0	7	177,35,77,110,551,40,263,	0,3300,4180,7143,7346,9184,13794,
chr2	126503071	126517125	TCONS_00061848	1000	-	126517125	126517125	0	4	158,754,40,279,	0,7124,9165,13775,
chr2	126503078	126528977	TCONS_00059419	1000	-	126528977	126528977	0	5	151,35,754,40,1,	0,3274,7117,9158,25898,
chr2	126505876	126531806	TCONS_00062290	1000	-	126531806	126531806	0	6	511,76,110,146,40,183,	0,1356,4319,4927,6360,25747,
chr2	126505876	126516888	TCONS_00062288	1000	-	126516888	126516888	0	5	511,76,110,551,42,	0,1356,4319,4522,10970,
chr2	126505876	126515062	TCONS_00062733	1000	-	126515062	126515062	0	6	1432,110,146,117,40,76,	0,4319,4927,5179,6360,9110,
chr2	126505893	126517154	TCONS_00058230	1000	-	126517154	126517154	0	7	494,76,110,146,117,40,308,	0,1339,4302,4910,5162,6343,10953,
chr2	126505893	126517154	TCONS_00063145	1000	-	126517154	126517154	0	5	494,76,754,40,308,	0,1339,4302,6343,10953,
chr2	126505893	126517154	TCONS_00062289	1000	-	126517154	126517154	0	6	494,76,754,117,40,308,	0,1339,4302,5162,6343,10953,
chr2	126506183	126517109	TCONS_00056880	1000	-	126517109	126517109	0	5	1173,754,117,40,263,	0,4012,4872,6053,10663,
chr2	126506205	126560196	TCONS_00060893	1000	-	126560196	126560196	0	6	182,76,754,117,40,33,	0,1027,3990,4850,6031,53958,
chr2	126506362	126511113	TCONS_00058229	1000	-	126511113	126511113	0	4	25,124,110,715,	0,870,3833,4036,
chr2	126506363	126517068	TCONS_00059941	1000	-	126517068	126517068	0	7	24,124,110,146,117,40,222,	0,869,3832,4440,4692,5873,10483,
chr2	126506363	126517068	TCONS_00059942	1000	-	126517068	126517068	0	4	24,754,40,222,	0,3832,5873,10483,
chr2	126506415	126517115	TCONS_00058848	1000	-	126517115	126517115	0	5	941,110,551,40,269,	0,3780,3983,5821,10431,
chr2	126507249	126531801	TCONS_00059422	1000	-	126531801	126531801	0	4	59,754,40,178,	0,2946,4987,24374,
chr2	126507249	126528999	TCONS_00059420	1000	-	126528999	126528999	0	5	59,110,774,40,23,	0,2946,3149,4987,21727,
chr2	126507291	126517107	TCONS_00061394	1000	-	126517107	126517107	0	5	17,110,146,40,261,	0,2904,3512,4945,9555,
chr2	126509870	126517125	TCONS_00056881	1000	-	126517125	126517125	0	4	1079,117,40,279,	0,1185,2366,6976,
chr2	126509874	126560262	TCONS_00056882	1000	-	126560262	126560262	0	4	1298,40,182,100,	0,2362,21749,50288,
chr2	126509956	126517154	TCONS_00059423	1000	-	126517154	126517154	0	4	349,146,40,308,	0,847,2280,6890,
chr2	126510279	126515062	TCONS_00062734	1000	-	126515062	126515062	0	3	893,40,76,	0,1957,4707,
chr2	126515072	126517130	TCONS_00060894	1000	-	126517130	126517130	0	2	80,284,	0,1774,
chr2	126756332	126791778	TCONS_00059943	1000	-	126791778	126791778	0	4	40,222,101,92,	0,33305,34316,35354,
chr2	126787541	126791939	TCONS_00060895	1000	-	126791939	126791939	0	4	66,222,101,253,	0,2096,3107,4145,
chr2	126789634	126791792	TCONS_00056883	1000	-	126791792	126791792	0	3	225,101,106,	0,1014,2052,
chr2	129031952	129083563	TCONS_00060896	1000	-	129083563	129083563	0	4	287,134,201,39,	0,653,25048,51572,
chr2	136286268	136288105	TCONS_00062961	1000	+	136288105	136288105	0	2	26,1018,	0,819,
chr2	136286500	136301370	TCONS_00060681	1000	+	136301370	136301370	0	2	1738,4372,	0,10498,
chr2	136301927	136307907	TCONS_00062962	1000	+	136307907	136307907	0	2	2475,1197,	0,4783,
chr2	140164917	140167356	TCONS_00057886	1000	+	140167356	140167356	0	2	795,1552,	0,887,
chr2	140332164	140334761	TCONS_00060686	1000	+	140334761	140334761	0	2	244,2257,	0,340,
chr2	140548566	140595673	TCONS_00059145	1000	+	140595673	140595673	0	2	98,1783,	0,45324,
chr2	140554798	140596699	TCONS_00061637	1000	+	140596699	140596699	0	2	35,2809,	0,39092,
chr2	140572868	140596704	TCONS_00058558	1000	+	140596704	140596704	0	2	2472,2814,	0,21022,
chr2	140586548	140596704	TCONS_00058559	1000	+	140596704	140596704	0	2	60,2814,	0,7342,
chr2	167549179	167585151	TCONS_00059464	1000	-	167585151	167585151	0	3	351,358,116,	0,27945,35856,
chr2	167574904	167579286	TCONS_00063164	1000	-	167579286	167579286	0	2	2578,137,	0,4245,
chr2	167575003	167627735	TCONS_00062773	1000	-	167627735	167627735	0	3	2479,151,34,	0,4489,52698,
chr2	167576709	167627761	TCONS_00057048	1000	-	167627761	167627761	0	2	773,60,	0,50992,
chr2	167746805	167769249	TCONS_00059466	1000	-	167769249	167769249	0	2	1319,164,	0,22280,
chr2	167747882	167763030	TCONS_00057049	1000	-	167763030	167763030	0	2	242,1122,	0,14026,
chr2	167791183	167795641	TCONS_00059727	1000	+	167795641	167795641	0	3	42,75,1264,	0,1803,3194,
chr2	176100441	176152288	TCONS_00060935	1000	-	176152288	176152288	0	2	81,818,	0,51029,
chr2	181003359	181008792	TCONS_00060719	1000	+	181008792	181008792	0	2	2544,2633,	0,2800,
chr2	181003359	181008792	TCONS_00060720	1000	+	181008792	181008792	0	2	2342,2835,	0,2598,
chr2	200255356	200259350	TCONS_00062791	1000	-	200259350	200259350	0	2	469,119,	0,3875,
chr2	202548237	202559040	TCONS_00059998	1000	-	202559040	202559040	0	2	306,1421,	0,9382,
chr2	203857081	203859113	TCONS_00057187	1000	-	203859113	203859113	0	2	489,393,	0,1639,
chr2	203857094	203876750	TCONS_00063191	1000	-	203876750	203876750	0	3	476,287,342,	0,1626,19314,
chr2	203857094	203876750	TCONS_00063192	1000	-	203876750	203876750	0	3	476,287,374,	0,1626,19282,
chr2	203895418	203897651	TCONS_00063193	1000	-	203897651	203897651	0	3	1311,196,38,	0,1794,2195,
chr2	203895958	203897907	TCONS_00058931	1000	-	203897907	203897907	0	2	771,695,	0,1254,
chr2	203896629	203910964	TCONS_00057188	1000	-	203910964	203910964	0	5	100,706,108,71,191,	0,583,6016,11335,14144,
chr2	203896821	203910964	TCONS_00057189	1000	-	203910964	203910964	0	3	1097,71,191,	0,11143,13952,
chr2	203906049	203910926	TCONS_00060004	1000	-	203910926	203910926	0	2	1986,153,	0,4724,
chr2	203931216	203934359	TCONS_00058315	1000	-	203934359	203934359	0	3	1081,989,111,	0,1362,3032,
chr2	206284178	206287165	TCONS_00055896	1000	+	206287165	206287165	0	2	629,890,	0,2097,
chr2	206807896	206816679	TCONS_00059755	1000	+	206816679	206816679	0	2	210,4896,	0,3887,
chr2	215203495	215211494	TCONS_00057330	1000	-	215211494	215211494	0	2	6284,1033,	0,6966,
chr2	215475150	215478877	TCONS_00058645	1000	+	215478877	215478877	0	2	227,2088,	0,1639,
chr2	215668421	215674069	TCONS_00056060	1000	+	215674069	215674069	0	2	1240,4067,	0,1581,
chr2	224946961	224955747	TCONS_00059802	1000	+	224955747	224955747	0	2	215,292,	0,8494,
chr2	229530642	229538049	TCONS_00059572	1000	-	229538049	229538049	0	2	2578,4689,	0,2718,
chr2	229530676	229538045	TCONS_00058988	1000	-	229538045	229538045	0	2	2522,4707,	0,2662,
chr2	229530681	229538046	TCONS_00061510	1000	-	229538046	229538046	0	2	2546,4686,	0,2679,
chr2	229686371	229691588	TCONS_00062841	1000	-	229691588	229691588	0	2	1428,25,	0,5192,
chr2	239782928	239788889	TCONS_00058697	1000	+	239788889	239788889	0	2	4484,1333,	0,4628,
chr2	239783892	239790737	TCONS_00062174	1000	+	239790737	239790737	0	3	3520,129,1597,	0,3664,5248,
chr2	242365346	242482880	TCONS_00060075	1000	-	242482880	242482880	0	8	40,87,135,202,168,137,223,59,	0,38835,39468,41952,43446,45133,116898,117475,
chr2	242380285	242410619	TCONS_00062395	1000	-	242410619	242410619	0	7	64,108,87,135,202,168,140,	0,5665,23896,24529,27013,28507,30194,
chr2	242381211	242410640	TCONS_00061023	1000	-	242410640	242410640	0	7	2896,108,87,135,202,168,161,	0,4739,22970,23603,26087,27581,29268,
chr2	242382298	242482722	TCONS_00059590	1000	-	242482722	242482722	0	8	1809,108,87,135,202,168,137,478,	0,3652,21883,22516,25000,26494,28181,99946,
chr2	242383495	242482880	TCONS_00060076	1000	-	242482880	242482880	0	9	612,108,87,135,202,168,137,223,59,	0,2455,20686,21319,23803,25297,26984,98749,99326,
chr2	242385949	242482452	TCONS_00061532	1000	-	242482452	242482452	0	7	109,87,135,202,168,137,208,	0,18232,18865,21349,22843,24530,96295,
chr2	242390396	242410619	TCONS_00062396	1000	-	242410619	242410619	0	6	80,87,135,202,168,140,	0,13785,14418,16902,18396,20083,
chr2	242390438	242482710	TCONS_00057559	1000	-	242482710	242482710	0	7	38,87,135,202,168,137,466,	0,13743,14376,16860,18354,20041,91806,
chr2	242402583	242410619	TCONS_00062397	1000	-	242410619	242410619	0	6	20,87,135,202,168,140,	0,1598,2231,4715,6209,7896,
chr2	242404014	242410618	TCONS_00060569	1000	-	242410618	242410618	0	5	254,135,202,168,139,	0,800,3284,4778,6465,
chr2	259153694	259177158	TCONS_00062411	1000	-	259177158	259177158	0	2	14897,3109,	0,20355,
chr2	261368475	261371119	TCONS_00057658	1000	-	261371119	261371119	0	3	1150,662,85,	0,1470,2559,
chr2	268880095	268888448	TCONS_00059036	1000	-	268888448	268888448	0	2	563,24,	0,8329,
chr2	269236384	269264780	TCONS_00056415	1000	+	269264780	269264780	0	2	9359,18607,	0,9789,
chr2	269238633	269259107	TCONS_00058724	1000	+	269259107	269259107	0	2	7110,12939,	0,7535,
chr2	277618978	277637339	TCONS_00061558	1000	-	277637339	277637339	0	2	208,132,	0,18229,
chr3	92119044	92396136	TCONS_00069225	1000	+	92396136	92396136	0	3	1170,181,1432,	0,272843,275660,
chr3	92119309	92392856	TCONS_00073759	1000	+	92392856	92392856	0	3	905,60,969,	0,95819,272578,
chr3	32487599	32653409	TCONS_00070550	1000	+	32653409	32653409	0	2	6866,29,	0,165781,
chr3	18464306	18496691	TCONS_00067912	1000	-	18496691	18496691	0	3	491,577,380,	0,11442,32005,
chr3	18474749	18496891	TCONS_00067913	1000	-	18496891	18496891	0	2	1576,392,	0,21750,
chr3	18474774	18481697	TCONS_00070852	1000	-	18481697	18481697	0	2	1551,604,	0,6319,
chr3	18474798	18496728	TCONS_00070213	1000	-	18496728	18496728	0	2	1527,417,	0,21513,
chr3	35239540	35265945	TCONS_00073715	1000	+	35265945	35265945	0	3	1748,75,62,	0,3055,26343,
chr3	38330065	38587315	TCONS_00074188	1000	+	38587315	38587315	0	4	76,153,105,2191,	0,131604,194420,255059,
chr3	69305230	69349445	TCONS_00069951	1000	+	69349445	69349445	0	2	1316,966,	0,43249,
chr3	69305588	69348985	TCONS_00071753	1000	+	69348985	69348985	0	2	1249,201,	0,43196,
chr3	89753817	89842298	TCONS_00068312	1000	-	89842298	89842298	0	4	396,95,114,2399,	0,29364,81097,86082,
chr3	92675885	93029970	TCONS_00073285	1000	+	93029970	93029970	0	3	586,88,3031,	0,251707,351054,
chr3	92844218	93029970	TCONS_00069979	1000	+	93029970	93029970	0	3	266,88,3031,	0,83374,182721,
chr3	92927588	93039462	TCONS_00066944	1000	+	93039462	93039462	0	3	92,52,748,	0,99351,111126,
chr3	92927592	93032734	TCONS_00074697	1000	+	93032734	93032734	0	3	88,106,5795,	0,89474,99347,
chr3	92927594	93032770	TCONS_00069226	1000	+	93032770	93032770	0	2	86,5831,	0,99345,
chr3	92927597	93032770	TCONS_00074232	1000	+	93032770	93032770	0	2	285,5831,	0,99342,
chr3	115076765	115108417	TCONS_00074500	1000	-	115108417	115108417	0	2	24,3297,	0,28355,
chr3	122905131	123302241	TCONS_00070663	1000	+	123302241	123302241	0	4	232,120,81,1011,	0,53282,210006,396099,
chr3	122954679	123115265	TCONS_00070664	1000	+	123115265	123115265	0	3	70,120,128,	0,3734,160458,
chr3	136181988	136236643	TCONS_00067232	1000	+	136236643	136236643	0	2	209,77,	0,54578,
chr3	138994777	139109281	TCONS_00070402	1000	-	139109281	139109281	0	3	166,117,3204,	0,3116,111300,
chr3	138994777	139109281	TCONS_00070404	1000	-	139109281	139109281	0	4	166,117,145,1830,	0,3116,111300,112674,
chr3	138994777	139109281	TCONS_00070403	1000	-	139109281	139109281	0	4	166,117,145,2950,	0,3116,111300,111554,
chr3	138997873	139109410	TCONS_00068624	1000	-	139109410	139109410	0	3	137,2949,27,	0,108204,111510,
chr3	177728345	177802294	TCONS_00073179	1000	-	177802294	177802294	0	9	191,100,95,198,105,112,168,166,186,	0,941,2703,5154,21119,40849,58906,61396,73763,
chr3	177728771	177787485	TCONS_00073652	1000	-	177787485	177787485	0	5	615,95,198,105,224,	0,2277,4728,20693,58490,
chr3	177732644	177802344	TCONS_00072685	1000	-	177802344	177802344	0	7	482,198,105,94,168,166,236,	0,855,16820,36550,54607,57097,69464,
chr3	177732644	177788219	TCONS_00072684	1000	-	177788219	177788219	0	4	482,198,105,968,	0,855,16820,54607,
chr3	177733094	177789990	TCONS_00074135	1000	-	177789990	177789990	0	6	32,198,105,112,158,249,	0,405,16370,36100,54167,56647,
chr3	177733120	177790037	TCONS_00068976	1000	-	177790037	177790037	0	5	6,198,105,168,296,	0,379,16344,54131,56621,
chr3	2660023	2663108	TCONS_00069077	1000	+	2663108	2663108	0	2	2011,30,	0,3055,
chr3	2660337	2663177	TCONS_00072706	1000	+	2663177	2663177	0	2	1667,100,	0,2740,
chr3	8796435	8802397	TCONS_00071689	1000	+	8802397	8802397	0	2	897,1480,	0,4482,
chr3	11473869	11474967	TCONS_00066448	1000	+	11474967	11474967	0	2	72,574,	0,524,
chr3	11473897	11477850	TCONS_00066449	1000	+	11477850	11477850	0	3	44,52,1754,	0,496,2199,
chr3	15904528	15906543	TCONS_00073450	1000	-	15906543	15906543	0	2	275,496,	0,1519,
chr3	17855931	17859096	TCONS_00066567	1000	+	17859096	17859096	0	2	535,1445,	0,1720,
chr3	17856071	17859107	TCONS_00066566	1000	+	17859107	17859107	0	2	444,1456,	0,1580,
chr3	17856076	17859768	TCONS_00072750	1000	+	17859768	17859768	0	3	439,1546,461,	0,1575,3231,
chr3	17856076	17859768	TCONS_00072752	1000	+	17859768	17859768	0	3	390,1546,461,	0,1575,3231,
chr3	19691102	19704897	TCONS_00070544	1000	+	19704897	19704897	0	2	10487,1937,	0,11858,
chr3	28521712	28531123	TCONS_00071444	1000	-	28531123	28531123	0	2	2005,3207,	0,6204,
chr3	35199195	35214097	TCONS_00069898	1000	+	35214097	35214097	0	3	736,170,146,	0,1852,14756,
chr3	35239540	35242622	TCONS_00069901	1000	+	35242622	35242622	0	2	1679,27,	0,3055,
chr3	35239724	35242462	TCONS_00066643	1000	+	35242462	35242462	0	2	72,2137,	0,601,
chr3	54640041	54645598	TCONS_00066712	1000	+	54645598	54645598	0	2	136,151,	0,5406,
chr3	55087709	55091067	TCONS_00066719	1000	+	55091067	55091067	0	3	285,155,220,	0,1721,3138,
chr3	55087709	55091067	TCONS_00066720	1000	+	55091067	55091067	0	3	285,199,220,	0,1677,3138,
chr3	64918326	64931530	TCONS_00071213	1000	+	64931530	64931530	0	3	1010,148,303,	0,5946,12901,
chr3	64918326	64931530	TCONS_00073259	1000	+	64931530	64931530	0	3	1010,148,192,	0,5946,13012,
chr3	64930700	64931461	TCONS_00071748	1000	+	64931461	64931461	0	2	408,234,	0,527,
chr3	66710358	66712889	TCONS_00066801	1000	+	66712889	66712889	0	2	873,1544,	0,987,
chr3	69030523	69036115	TCONS_00072789	1000	+	69036115	69036115	0	2	20,1377,	0,4215,
chr3	71036285	71038491	TCONS_00073514	1000	-	71038491	71038491	0	2	627,934,	0,1272,
chr3	71085871	71096914	TCONS_00073516	1000	-	71096914	71096914	0	4	554,244,158,1022,	0,845,6577,10021,
chr3	71085871	71092945	TCONS_00073515	1000	-	71092945	71092945	0	3	554,244,497,	0,845,6577,
chr3	71086787	71092949	TCONS_00072533	1000	-	71092949	71092949	0	2	173,501,	0,5661,
chr3	71092016	71096290	TCONS_00072045	1000	-	71096290	71096290	0	2	590,398,	0,3876,
chr3	77615136	77644697	TCONS_00072049	1000	-	77644697	77644697	0	4	212,131,200,257,	0,12249,24627,29304,
chr3	77637629	77644733	TCONS_00068207	1000	-	77644733	77644733	0	3	381,200,293,	0,2134,6811,
chr3	77637772	77644705	TCONS_00073998	1000	-	77644705	77644705	0	3	238,203,265,	0,1991,6668,
chr3	77637841	77644739	TCONS_00071507	1000	-	77644739	77644739	0	3	166,200,299,	0,1922,6599,
chr3	77637841	77641402	TCONS_00071506	1000	-	77641402	77641402	0	3	169,200,212,	0,1922,3349,
chr3	77637881	77640040	TCONS_00073055	1000	-	77640040	77640040	0	2	129,277,	0,1882,
chr3	78653867	78656759	TCONS_00072053	1000	-	78656759	78656759	0	2	52,692,	0,2200,
chr3	88405988	88430019	TCONS_00066933	1000	+	88430019	88430019	0	3	204,213,2229,	0,20707,21802,
chr3	88405996	88430110	TCONS_00066934	1000	+	88430110	88430110	0	2	196,2320,	0,21794,
chr3	88407765	88429988	TCONS_00066935	1000	+	88429988	88429988	0	2	136,2198,	0,20025,
chr3	88407864	88429949	TCONS_00073757	1000	+	88429949	88429949	0	2	29,2159,	0,19926,
chr3	88426534	88429988	TCONS_00071779	1000	+	88429988	88429988	0	2	374,2198,	0,1256,
chr3	92118994	92120577	TCONS_00070610	1000	+	92120577	92120577	0	2	762,457,	0,1126,
chr3	93336872	93439485	TCONS_00071780	1000	+	93439485	93439485	0	4	2019,51,98,56,	0,100567,101007,102557,
chr3	97710434	97714312	TCONS_00072067	1000	-	97714312	97714312	0	2	1795,312,	0,3566,
chr3	98622198	98626539	TCONS_00069611	1000	-	98626539	98626539	0	2	4135,57,	0,4284,
chr3	99167524	99207628	TCONS_00071781	1000	+	99207628	99207628	0	2	714,3359,	0,36745,
chr3	99167525	99205875	TCONS_00074233	1000	+	99205875	99205875	0	3	713,156,894,	0,36744,37456,
chr3	99167525	99171532	TCONS_00069230	1000	+	99171532	99171532	0	2	713,920,	0,3087,
chr3	99167531	99178142	TCONS_00066954	1000	+	99178142	99178142	0	2	707,795,	0,9816,
chr3	99167532	99213023	TCONS_00073286	1000	+	99213023	99213023	0	2	706,4288,	0,41203,
chr3	99167535	99213017	TCONS_00070614	1000	+	99213017	99213017	0	2	703,1566,	0,43916,
chr3	99167550	99207662	TCONS_00074700	1000	+	99207662	99207662	0	2	688,2681,	0,37431,
chr3	115106857	115198056	TCONS_00071543	1000	-	115198056	115198056	0	6	131,1202,99,233,97,462,	0,6287,13843,15336,90465,90737,
chr3	115107632	115197633	TCONS_00069633	1000	-	115197633	115197633	0	6	1600,1202,99,233,97,39,	0,5512,13068,14561,89690,89962,
chr3	115111070	115121002	TCONS_00068410	1000	-	115121002	115121002	0	2	3276,302,	0,9630,
chr3	115113054	115120812	TCONS_00072564	1000	-	115120812	115120812	0	2	1292,113,	0,7645,
chr3	123929511	123931390	TCONS_00074948	1000	-	123931390	123931390	0	2	593,698,	0,1181,
chr3	127154213	127155152	TCONS_00073117	1000	-	127155152	127155152	0	2	222,255,	0,684,
chr3	128254800	128264476	TCONS_00074063	1000	-	128264476	128264476	0	3	896,201,117,	0,7632,9559,
chr3	128303309	128310993	TCONS_00073800	1000	+	128310993	128310993	0	5	701,126,141,110,411,	0,2181,5672,6116,7273,
chr3	128305572	128312784	TCONS_00071285	1000	+	128312784	128312784	0	5	44,162,110,65,887,	0,3388,3853,5010,6325,
chr3	128307917	128310559	TCONS_00072862	1000	+	128310559	128310559	0	2	1205,1134,	0,1508,
chr3	131430951	131437478	TCONS_00074275	1000	+	131437478	131437478	0	2	76,6384,	0,143,
chr3	136366878	136378775	TCONS_00073822	1000	+	136378775	136378775	0	2	390,609,	0,11288,
chr3	138994696	138998349	TCONS_00074543	1000	-	138998349	138998349	0	2	174,456,	0,3197,
chr3	139105511	139109810	TCONS_00072626	1000	-	139109810	139109810	0	3	711,1575,427,	0,1940,3872,
chr3	139105511	139109124	TCONS_00072625	1000	-	139109124	139109124	0	2	711,2793,	0,820,
chr3	139105559	139109118	TCONS_00072133	1000	-	139109118	139109118	0	2	663,1667,	0,1892,
chr3	139105559	139109118	TCONS_00073130	1000	-	139109118	139109118	0	2	861,2581,	0,978,
chr3	139105638	139109179	TCONS_00074974	1000	-	139109179	139109179	0	2	1072,1728,	0,1813,
chr3	139105667	139109411	TCONS_00071043	1000	-	139109411	139109411	0	2	3425,28,	0,3716,
chr3	139106081	139109406	TCONS_00071042	1000	-	139109406	139109406	0	3	141,497,23,	0,2514,3302,
chr3	139106087	139109417	TCONS_00072134	1000	-	139109417	139109417	0	3	135,431,34,	0,2508,3296,
chr3	139106157	139109411	TCONS_00074075	1000	-	139109411	139109411	0	3	65,1372,28,	0,1563,3226,
chr3	139106451	139109410	TCONS_00071602	1000	-	139109410	139109410	0	3	259,1575,27,	0,1000,2932,
chr3	140939947	140946583	TCONS_00069308	1000	+	140946583	140946583	0	2	4799,1627,	0,5009,
chr3	141354153	141358862	TCONS_00068637	1000	-	141358862	141358862	0	2	2561,1328,	0,3381,
chr3	141697964	141701737	TCONS_00067249	1000	+	141701737	141701737	0	2	793,24,	0,3749,
chr3	145394810	145399513	TCONS_00073341	1000	+	145399513	145399513	0	3	42,222,1665,	0,519,3038,
chr3	154225238	154241502	TCONS_00073352	1000	+	154241502	154241502	0	2	4717,30,	0,16234,
chr3	154717653	154723812	TCONS_00071867	1000	+	154723812	154723812	0	2	715,200,	0,5959,
chr3	154947914	154949337	TCONS_00074294	1000	+	154949337	154949337	0	2	1148,148,	0,1275,
chr3	155192397	155200589	TCONS_00071619	1000	-	155200589	155200589	0	2	2473,97,	0,8095,
chr3	160505731	160517254	TCONS_00072380	1000	+	160517254	160517254	0	2	291,3049,	0,8474,
chr3	160758538	160761786	TCONS_00072908	1000	+	160761786	160761786	0	2	1081,1209,	0,2039,
chr3	161560124	161572106	TCONS_00070104	1000	+	161572106	161572106	0	3	8681,104,926,	0,10214,11056,
chr3	161560124	161572106	TCONS_00070732	1000	+	161572106	161572106	0	3	6701,104,930,	0,10214,11052,
chr3	161561711	161572047	TCONS_00067462	1000	+	161572047	161572047	0	2	8731,867,	0,9469,
chr3	161562678	161572097	TCONS_00074764	1000	+	161572097	161572097	0	3	4147,105,921,	0,7659,8498,
chr3	161566312	161570574	TCONS_00070733	1000	+	161570574	161570574	0	3	229,2195,236,	0,298,4026,
chr3	161566464	161569896	TCONS_00073374	1000	+	161569896	161569896	0	3	77,215,2364,	0,146,1068,
chr3	161566476	161570357	TCONS_00069361	1000	+	161570357	161570357	0	2	65,3747,	0,134,
chr3	161568420	161572342	TCONS_00069362	1000	+	161572342	161572342	0	2	2022,1166,	0,2756,
chr3	162845109	162848021	TCONS_00074111	1000	-	162848021	162848021	0	2	156,227,	0,2685,
chr3	162901474	162905672	TCONS_00074765	1000	+	162905672	162905672	0	2	1464,22,	0,4176,
chr3	162946975	162955830	TCONS_00071634	1000	-	162955830	162955830	0	3	2051,93,21,	0,8424,8834,
chr3	162946996	162955867	TCONS_00068833	1000	-	162955867	162955867	0	4	2030,214,95,58,	0,5335,8403,8813,
chr3	162955460	162956967	TCONS_00072163	1000	-	162956967	162956967	0	2	32,1295,	0,212,
chr3	164838016	164839679	TCONS_00070110	1000	+	164839679	164839679	0	2	933,43,	0,1620,
chr3	167218495	167223699	TCONS_00069383	1000	+	167223699	167223699	0	3	628,107,111,	0,805,5093,
chr3	177768518	177802344	TCONS_00070481	1000	-	177802344	177802344	0	4	788,158,166,236,	0,18743,21223,33590,
chr3	177769187	177802297	TCONS_00068978	1000	-	177802297	177802297	0	4	101,168,166,189,	0,18064,20554,32921,
chr3	178462445	178466199	TCONS_00073653	1000	-	178466199	178466199	0	2	955,182,	0,3572,
chr3	178462643	178467244	TCONS_00070483	1000	-	178467244	178467244	0	3	757,66,74,	0,3374,4527,
chr3	178462646	178465166	TCONS_00074136	1000	-	178465166	178465166	0	2	754,412,	0,2108,
chr3	181565741	181570498	TCONS_00072415	1000	+	181570498	181570498	0	2	624,3989,	0,768,
chr4	239070246	239088974	TCONS_00081295	1000	+	239088974	239088974	0	2	457,413,	0,18315,
chr4	1070214	1244740	TCONS_00080978	1000	-	1244740	1244740	0	5	2494,91,157,54,79,	0,3980,4709,40132,174447,
chr4	1070219	1245435	TCONS_00076128	1000	-	1245435	1245435	0	6	2489,91,157,54,102,555,	0,3975,4704,40127,174442,174661,
chr4	1074940	1247355	TCONS_00079634	1000	-	1247355	1247355	0	4	140,79,102,2475,	0,158870,169721,169940,
chr4	1074940	1247355	TCONS_00079635	1000	-	1247355	1247355	0	4	140,54,102,2475,	0,35406,169721,169940,
chr4	31188277	31200357	TCONS_00075218	1000	+	31200357	31200357	0	3	223,140,33,	0,1937,12047,
chr4	31188394	31200401	TCONS_00077824	1000	+	31200401	31200401	0	3	106,91,77,	0,1869,11930,
chr4	52114839	52172022	TCONS_00080540	1000	+	52172022	52172022	0	4	4277,94,162,119,	0,11424,50320,57064,
chr4	52165164	52176868	TCONS_00079838	1000	+	52176868	52176868	0	3	157,69,1028,	0,6739,10676,
chr4	134915134	135045465	TCONS_00075396	1000	+	135045465	135045465	0	3	533,74,2887,	0,49448,127444,
chr4	134915870	135045465	TCONS_00077275	1000	+	135045465	135045465	0	3	119,74,2887,	0,48712,126708,
chr4	145343521	145423253	TCONS_00079526	1000	+	145423253	145423253	0	4	126,90,166,68,	0,2007,51153,79664,
chr4	145351192	145372301	TCONS_00077889	1000	+	145372301	145372301	0	2	519,3233,	0,17876,
chr4	159194717	159269040	TCONS_00078369	1000	+	159269040	159269040	0	3	33,292,436,	0,14567,73887,
chr4	189823838	190142290	TCONS_00079742	1000	-	190142290	190142290	0	7	118,64,136,168,267,84,78,	0,298212,298472,300449,301784,311547,318374,
chr4	189858721	190155968	TCONS_00078614	1000	-	190155968	190155968	0	8	258,182,64,136,168,181,133,71,	0,217940,263329,263589,265566,266983,293986,297176,
chr4	205123818	205138534	TCONS_00080759	1000	-	205138534	205138534	0	4	32,183,124,127,	0,8343,11704,14589,
chr4	226963151	227032367	TCONS_00081287	1000	+	227032367	227032367	0	4	311,191,138,1746,	0,665,52984,67470,
chr4	227014948	227032624	TCONS_00077441	1000	+	227032624	227032624	0	3	150,133,2003,	0,1187,15673,
chr4	1065802	1074238	TCONS_00080658	1000	-	1074238	1074238	0	3	116,1256,44,	0,5650,8392,
chr4	1070207	1074283	TCONS_00079633	1000	-	1074283	1074283	0	2	2501,89,	0,3987,
chr4	1070209	1110389	TCONS_00078482	1000	-	1110389	1110389	0	4	2405,91,157,43,	0,3985,4714,40137,
chr4	1070209	1107503	TCONS_00078481	1000	-	1107503	1107503	0	4	2499,91,157,75,	0,3985,4714,37219,
chr4	1070215	1074218	TCONS_00079988	1000	-	1074218	1074218	0	2	2493,28,	0,3975,
chr4	1244372	1247355	TCONS_00079636	1000	-	1247355	1247355	0	2	391,2475,	0,508,
chr4	6685616	6691557	TCONS_00076145	1000	-	6691557	6691557	0	3	1583,518,1054,	0,1836,4887,
chr4	6685889	6691155	TCONS_00077474	1000	-	6691155	6691155	0	2	2081,652,	0,4614,
chr4	6686463	6688402	TCONS_00079259	1000	-	6688402	6688402	0	2	1507,39,	0,1900,
chr4	6725538	6728008	TCONS_00076146	1000	-	6728008	6728008	0	2	1944,427,	0,2043,
chr4	6725844	6728509	TCONS_00078047	1000	-	6728509	6728509	0	2	1905,408,	0,2257,
chr4	6725945	6728502	TCONS_00079637	1000	-	6728502	6728502	0	3	1537,168,401,	0,1636,2156,
chr4	6725948	6728477	TCONS_00080660	1000	-	6728477	6728477	0	3	1801,147,37,	0,2153,2492,
chr4	6726081	6728862	TCONS_00080333	1000	-	6728862	6728862	0	3	1668,147,221,	0,2020,2560,
chr4	7826741	7831009	TCONS_00080661	1000	-	7831009	7831009	0	4	1025,43,40,129,	0,2089,2673,4139,
chr4	7826782	7829464	TCONS_00076164	1000	-	7829464	7829464	0	3	984,43,50,	0,2048,2632,
chr4	8695682	8749713	TCONS_00081306	1000	-	8749713	8749713	0	2	523,2693,	0,51338,
chr4	8695800	8748208	TCONS_00080336	1000	-	8748208	8748208	0	3	405,310,1188,	0,48479,51220,
chr4	8695894	8746989	TCONS_00076174	1000	-	8746989	8746989	0	2	311,2710,	0,48385,
chr4	8716373	8729983	TCONS_00076175	1000	-	8729983	8729983	0	2	9344,2937,	0,10673,
chr4	11866641	11875243	TCONS_00075123	1000	+	11875243	11875243	0	2	471,3230,	0,5372,
chr4	12383484	12400109	TCONS_00078064	1000	-	12400109	12400109	0	2	253,1352,	0,15273,
chr4	12397679	12436463	TCONS_00079648	1000	-	12436463	12436463	0	3	4322,123,2922,	0,33311,35862,
chr4	12400159	12409075	TCONS_00078065	1000	-	12409075	12409075	0	2	1842,3533,	0,5383,
chr4	12400190	12433738	TCONS_00078914	1000	-	12433738	12433738	0	2	1811,197,	0,33351,
chr4	16957620	16962346	TCONS_00076206	1000	-	16962346	16962346	0	2	2907,1700,	0,3026,
chr4	21689454	21691643	TCONS_00080520	1000	+	21691643	21691643	0	2	193,1164,	0,1025,
chr4	21689458	21691840	TCONS_00075138	1000	+	21691840	21691840	0	3	256,108,968,	0,1021,1414,
chr4	21689458	21691840	TCONS_00075139	1000	+	21691840	21691840	0	3	256,104,968,	0,1021,1414,
chr4	21689458	21691840	TCONS_00075140	1000	+	21691840	21691840	0	3	189,104,968,	0,1021,1414,
chr4	21689486	21691456	TCONS_00077805	1000	+	21691456	21691456	0	3	161,108,584,	0,993,1386,
chr4	21689488	21691325	TCONS_00078725	1000	+	21691325	21691325	0	2	226,846,	0,991,
chr4	23633609	23640503	TCONS_00078921	1000	-	23640503	23640503	0	2	1098,5507,	0,1387,
chr4	23633609	23640503	TCONS_00078923	1000	-	23640503	23640503	0	2	1098,5594,	0,1300,
chr4	23633609	23640503	TCONS_00078922	1000	-	23640503	23640503	0	2	1098,5420,	0,1474,
chr4	23634677	23640464	TCONS_00081320	1000	-	23640464	23640464	0	2	29,5555,	0,232,
chr4	23634836	23639245	TCONS_00079657	1000	-	23639245	23639245	0	2	15,4307,	0,102,
chr4	25600934	25605035	TCONS_00079480	1000	+	25605035	25605035	0	2	9,2740,	0,1361,
chr4	31226095	31227719	TCONS_00075219	1000	+	31227719	31227719	0	2	196,821,	0,803,
chr4	35840352	35840772	TCONS_00076289	1000	-	35840772	35840772	0	2	61,249,	0,171,
chr4	52115024	52165338	TCONS_00081165	1000	+	52165338	52165338	0	4	4092,90,597,179,	0,11243,17737,50135,
chr4	52115036	52165294	TCONS_00078741	1000	+	52165294	52165294	0	2	4096,135,	0,50123,
chr4	52115048	52165314	TCONS_00080855	1000	+	52165314	52165314	0	2	4068,155,	0,50111,
chr4	52171746	52178124	TCONS_00079495	1000	+	52178124	52178124	0	2	226,2284,	0,4094,
chr4	56010253	56049113	TCONS_00080857	1000	+	56049113	56049113	0	2	320,1749,	0,37111,
chr4	56010291	56050840	TCONS_00077838	1000	+	56050840	56050840	0	3	282,294,2599,	0,37073,37950,
chr4	56016447	56049113	TCONS_00080858	1000	+	56049113	56049113	0	3	2124,294,872,	0,30917,31794,
chr4	56043994	56049043	TCONS_00079496	1000	+	56049043	56049043	0	3	3664,58,372,	0,4247,4677,
chr4	56045748	56050840	TCONS_00077839	1000	+	56050840	56050840	0	2	1910,2599,	0,2493,
chr4	63020899	63023140	TCONS_00075356	1000	+	63023140	63023140	0	2	356,1649,	0,592,
chr4	63022034	63023517	TCONS_00079506	1000	+	63023517	63023517	0	2	375,611,	0,872,
chr4	63022761	63024941	TCONS_00075357	1000	+	63024941	63024941	0	2	780,1019,	0,1161,
chr4	63022935	63024589	TCONS_00078757	1000	+	63024589	63024589	0	2	62,1211,	0,443,
chr4	133431677	133438342	TCONS_00077271	1000	+	133438342	133438342	0	2	2459,1997,	0,4668,
chr4	133431949	133438415	TCONS_00080550	1000	+	133438415	133438415	0	2	631,2070,	0,4396,
chr4	139916378	139921945	TCONS_00078347	1000	+	139921945	139921945	0	3	1391,115,1552,	0,3206,4015,
chr4	142929141	142937031	TCONS_00081212	1000	+	142937031	142937031	0	2	4074,53,	0,7837,
chr4	145343394	145351005	TCONS_00080890	1000	+	145351005	145351005	0	4	253,90,152,1487,	0,2134,2816,6124,
chr4	145343524	145346479	TCONS_00080232	1000	+	145346479	145346479	0	3	123,90,269,	0,2004,2686,
chr4	145345541	145351337	TCONS_00075487	1000	+	145351337	145351337	0	3	77,152,1819,	0,669,3977,
chr4	154304275	154305333	TCONS_00081046	1000	-	154305333	154305333	0	2	35,520,	0,538,
chr4	154304830	154314111	TCONS_00081363	1000	-	154314111	154314111	0	2	400,33,	0,9248,
chr4	154348740	154359583	TCONS_00080718	1000	-	154359583	154359583	0	2	106,5603,	0,5240,
chr4	159267238	159273379	TCONS_00081222	1000	+	159273379	159273379	0	2	1513,3003,	0,3138,
chr4	183188312	183201050	TCONS_00078174	1000	-	183201050	183201050	0	2	153,483,	0,12255,
chr4	183703747	183705859	TCONS_00079560	1000	+	183705859	183705859	0	2	68,781,	0,1331,
chr4	190076659	190142290	TCONS_00079743	1000	-	190142290	190142290	0	7	184,64,136,168,263,84,78,	0,45391,45651,47628,48963,58726,65553,
chr4	190076661	190142248	TCONS_00080742	1000	-	190142248	190142248	0	6	182,64,92,168,267,36,	0,45389,45693,47626,48961,65551,
chr4	190076673	190152959	TCONS_00076758	1000	-	190152959	190152959	0	7	170,64,136,168,263,84,252,	0,45377,45637,47614,48949,58712,76034,
chr4	190076686	190152777	TCONS_00081081	1000	-	190152777	190152777	0	7	157,64,136,168,267,82,70,	0,45364,45624,47601,48936,65526,76021,
chr4	190076686	190152777	TCONS_00081082	1000	-	190152777	190152777	0	7	157,64,92,168,267,82,70,	0,45364,45668,47601,48936,65526,76021,
chr4	190076686	190142376	TCONS_00080741	1000	-	190142376	190142376	0	6	157,64,136,168,267,164,	0,45364,45624,47601,48936,65526,
chr4	190076813	190152817	TCONS_00080442	1000	-	190152817	190152817	0	6	30,64,136,168,263,110,	0,45237,45497,47474,48809,75894,
chr4	190076813	190135457	TCONS_00080441	1000	-	190135457	190135457	0	6	30,64,136,168,267,72,	0,45237,45497,47474,48809,58572,
chr4	190121902	190152744	TCONS_00077649	1000	-	190152744	190152744	0	6	212,136,168,267,84,37,	0,408,2385,3720,13483,30805,
chr4	190122058	190142282	TCONS_00079010	1000	-	190142282	190142282	0	5	56,136,168,263,70,	0,252,2229,3564,20154,
chr4	190125621	190142279	TCONS_00078615	1000	-	190142279	190142279	0	3	268,84,67,	0,9764,16591,
chr4	192759003	192761331	TCONS_00080747	1000	-	192761331	192761331	0	2	402,1847,	0,481,
chr4	197492294	197497181	TCONS_00076794	1000	-	197497181	197497181	0	5	920,168,122,174,1027,	0,1022,2520,3026,3860,
chr4	197492294	197497181	TCONS_00076795	1000	-	197497181	197497181	0	4	920,102,122,1861,	0,1022,2520,3026,
chr4	197492294	197497178	TCONS_00076793	1000	-	197497178	197497178	0	5	920,102,122,174,1024,	0,1022,2520,3026,3860,
chr4	197492321	197497188	TCONS_00078630	1000	-	197497188	197497188	0	4	893,172,122,1868,	0,995,2493,2999,
chr4	197492443	197497188	TCONS_00078206	1000	-	197497188	197497188	0	5	771,172,122,174,1034,	0,873,2371,2877,3711,
chr4	197492447	197497145	TCONS_00080755	1000	-	197497145	197497145	0	5	767,172,122,186,991,	0,869,2367,2873,3707,
chr4	197492451	197497175	TCONS_00079019	1000	-	197497175	197497175	0	6	763,172,122,174,349,153,	0,865,2363,2869,3703,4571,
chr4	197492451	197496033	TCONS_00079018	1000	-	197496033	197496033	0	3	763,122,713,	0,2363,2869,
chr4	197492456	197496037	TCONS_00081088	1000	-	197496037	197496037	0	3	1028,122,717,	0,2358,2864,
chr4	197492459	197494918	TCONS_00080113	1000	-	197494918	197494918	0	2	959,104,	0,2355,
chr4	197492459	197493452	TCONS_00080111	1000	-	197493452	197493452	0	2	781,136,	0,857,
chr4	197492587	197497145	TCONS_00077667	1000	-	197497145	197497145	0	4	627,168,122,1825,	0,729,2227,2733,
chr4	197493064	197496046	TCONS_00079751	1000	-	197496046	197496046	0	3	354,122,726,	0,1750,2256,
chr4	205131693	205135647	TCONS_00076807	1000	-	205135647	205135647	0	2	651,125,	0,3829,
chr4	205134579	205138469	TCONS_00077671	1000	-	205138469	205138469	0	2	1067,62,	0,3828,
chr4	209668421	209686954	TCONS_00078422	1000	+	209686954	209686954	0	2	45,5687,	0,12846,
chr4	209670837	209684064	TCONS_00079926	1000	+	209684064	209684064	0	2	23,2797,	0,10430,
chr4	211632285	211635428	TCONS_00076863	1000	-	211635428	211635428	0	2	1134,1026,	0,2117,
chr4	219465344	219474033	TCONS_00075901	1000	+	219474033	219474033	0	3	150,419,709,	0,1212,7980,
chr4	219465344	219467505	TCONS_00077418	1000	+	219467505	219467505	0	2	150,949,	0,1212,
chr4	219777045	219781893	TCONS_00078430	1000	+	219781893	219781893	0	3	110,161,441,	0,1254,4407,
chr4	220106149	220109237	TCONS_00078228	1000	-	220109237	220109237	0	3	914,61,278,	0,1816,2810,
chr4	220107366	220109527	TCONS_00081279	1000	+	220109527	220109527	0	2	1902,139,	0,2022,
chr4	226963068	227015320	TCONS_00080954	1000	+	227015320	227015320	0	3	628,191,431,	0,748,51821,
chr4	226963149	227015228	TCONS_00079234	1000	+	227015228	227015228	0	2	858,339,	0,51740,
chr4	226963151	226966206	TCONS_00081286	1000	+	226966206	226966206	0	2	856,23,	0,3032,
chr4	227030595	227034956	TCONS_00076004	1000	+	227034956	227034956	0	2	2635,28,	0,4333,
chr4	227030595	227034198	TCONS_00076003	1000	+	227034198	227034198	0	2	2635,57,	0,3546,
chr4	227032089	227039936	TCONS_00079235	1000	+	227039936	227039936	0	2	1141,216,	0,7631,
chr4	232835548	232841160	TCONS_00080647	1000	+	232841160	232841160	0	3	68,213,240,	0,1494,5372,
chr4	232845946	232852256	TCONS_00080958	1000	+	232852256	232852256	0	2	1850,650,	0,5660,
chr5	14460415	14746096	TCONS_00086057	1000	+	14746096	14746096	0	3	2721,90,130,	0,170654,285551,
chr5	14460735	14730812	TCONS_00087517	1000	+	14730812	14730812	0	3	2401,90,26,	0,170334,270051,
chr5	14461462	14694259	TCONS_00085050	1000	+	14694259	14694259	0	3	1674,90,19,	0,169607,232778,
chr5	3392962	3418983	TCONS_00088894	1000	-	3418983	3418983	0	2	621,64,	0,25957,
chr5	14461313	14656963	TCONS_00088326	1000	+	14656963	14656963	0	3	1823,90,75,	0,169756,195575,
chr5	42368761	42711871	TCONS_00085073	1000	+	42711871	42711871	0	6	272,298,151,28,119,123,	0,373,4416,14650,176277,342987,
chr5	42368761	42619087	TCONS_00085072	1000	+	42619087	42619087	0	7	272,298,65,28,119,101,167,	0,373,4186,14650,176277,203723,250159,
chr5	42368761	42508909	TCONS_00085071	1000	+	42508909	42508909	0	4	272,298,28,14,	0,373,14650,140134,
chr5	42368884	42836776	TCONS_00085593	1000	+	42836776	42836776	0	6	548,28,90,132,119,939,	0,14527,41454,127747,176154,466953,
chr5	42368884	42496636	TCONS_00085592	1000	+	42496636	42496636	0	5	548,151,28,90,5,	0,4293,14527,41454,127747,
chr5	42368990	42602910	TCONS_00084496	1000	+	42602910	42602910	0	7	442,28,90,124,119,101,182,	0,14421,41348,139905,176048,203494,233738,
chr5	42368990	42496634	TCONS_00084494	1000	+	42496634	42496634	0	4	442,151,28,3,	0,4187,14421,127641,
chr5	42368990	42496634	TCONS_00084495	1000	+	42496634	42496634	0	3	442,28,3,	0,14421,127641,
chr5	42369001	42496804	TCONS_00087547	1000	+	42496804	42496804	0	4	431,28,90,339,	0,14410,41337,127464,
chr5	42369129	42577369	TCONS_00087935	1000	+	42577369	42577369	0	7	303,151,28,124,119,101,39,	0,4048,14282,139766,175909,203355,208201,
chr5	42369130	42602911	TCONS_00086080	1000	+	42602911	42602911	0	6	302,151,28,90,119,183,	0,4047,14281,41208,175908,233598,
chr5	42369130	42496564	TCONS_00086079	1000	+	42496564	42496564	0	3	302,28,99,	0,14281,127335,
chr5	43151336	43424232	TCONS_00086808	1000	-	43424232	43424232	0	3	409,84,490,	0,1367,272406,
chr5	43233997	43424226	TCONS_00085821	1000	-	43424226	43424226	0	2	336,484,	0,189745,
chr5	98904805	98992887	TCONS_00088571	1000	-	98992887	98992887	0	3	17933,75,311,	0,62699,87771,
chr5	98904848	98992855	TCONS_00083024	1000	-	98992855	98992855	0	2	17890,279,	0,87728,
chr5	127230740	127683693	TCONS_00087998	1000	+	127683693	127683693	0	7	217,55,121,160,72,90,227,	0,2991,6141,106653,326033,451826,452726,
chr5	127290755	127688643	TCONS_00086624	1000	+	127688643	127688643	0	6	232,160,72,90,163,1937,	0,46638,266018,391811,392711,395951,
chr5	127309361	127556943	TCONS_00087166	1000	+	127556943	127556943	0	3	653,160,170,	0,28032,247412,
chr5	127337401	127685561	TCONS_00083927	1000	+	127685561	127685561	0	4	152,72,90,2095,	0,219372,345165,346065,
chr5	127545168	127683693	TCONS_00087999	1000	+	127683693	127683693	0	4	106,72,90,227,	0,11605,137398,138298,
chr5	127547171	127683851	TCONS_00083928	1000	+	127683851	127683851	0	4	115,72,90,385,	0,9602,135395,136295,
chr5	151642510	151654102	TCONS_00084326	1000	-	151654102	151654102	0	2	2967,1257,	0,10335,
chr5	17552606	17558764	TCONS_00084126	1000	-	17558764	17558764	0	2	5828,113,	0,6045,
chr5	21577932	21605764	TCONS_00087314	1000	-	21605764	21605764	0	3	2436,105,926,	0,6599,26906,
chr5	21619661	21622148	TCONS_00085571	1000	+	21622148	21622148	0	2	272,1982,	0,505,
chr5	21619702	21622151	TCONS_00086531	1000	+	21622151	21622151	0	2	64,1985,	0,464,
chr5	29125270	29126891	TCONS_00088332	1000	+	29126891	29126891	0	2	68,1336,	0,285,
chr5	30394414	30395112	TCONS_00084143	1000	-	30395112	30395112	0	2	531,75,	0,623,
chr5	30446076	30495003	TCONS_00081560	1000	+	30495003	30495003	0	2	8756,82,	0,48845,
chr5	42369001	42401266	TCONS_00087546	1000	+	42401266	42401266	0	3	431,28,3,	0,14410,32262,
chr5	42369001	42383733	TCONS_00087077	1000	+	42383733	42383733	0	3	431,151,322,	0,4176,14410,
chr5	42369130	42410524	TCONS_00083807	1000	+	42410524	42410524	0	4	302,151,28,186,	0,4047,14281,41208,
chr5	42369133	42413478	TCONS_00086078	1000	+	42413478	42413478	0	4	299,28,90,55,	0,14278,41205,44290,
chr5	43151333	43182147	TCONS_00088525	1000	-	43182147	43182147	0	4	412,84,269,359,	0,1370,9537,30455,
chr5	43151490	43161114	TCONS_00088908	1000	-	43161114	43161114	0	3	255,79,249,	0,1213,9375,
chr5	43151527	43181860	TCONS_00086305	1000	-	43181860	43181860	0	4	218,84,57,72,	0,1176,29399,30261,
chr5	43151574	43181881	TCONS_00087740	1000	-	43181881	43181881	0	5	171,84,269,57,93,	0,1129,9296,29352,30214,
chr5	43151574	43161745	TCONS_00085305	1000	-	43161745	43161745	0	3	171,84,875,	0,1129,9296,
chr5	43151626	43201410	TCONS_00082702	1000	-	43201410	43201410	0	5	119,84,57,111,8,	0,1077,29300,30162,49776,
chr5	43151626	43182004	TCONS_00084782	1000	-	43182004	43182004	0	3	119,84,216,	0,1077,30162,
chr5	43151628	43161115	TCONS_00085820	1000	-	43161115	43161115	0	3	117,84,48,	0,1075,9439,
chr5	43160870	43182004	TCONS_00084783	1000	-	43182004	43182004	0	4	269,94,57,216,	0,13329,20056,20918,
chr5	43179618	43184095	TCONS_00088909	1000	-	43184095	43184095	0	3	1365,111,25,	0,2170,4452,
chr5	52008830	52017307	TCONS_00087742	1000	-	52017307	52017307	0	3	23,91,223,	0,7474,8254,
chr5	52013876	52017189	TCONS_00084788	1000	-	52017189	52017189	0	3	201,91,105,	0,2428,3208,
chr5	52015949	52017342	TCONS_00085825	1000	-	52017342	52017342	0	2	446,258,	0,1135,
chr5	53930809	53990071	TCONS_00088351	1000	+	53990071	53990071	0	6	1004,208,141,147,97,813,	0,5713,27898,29771,31342,58449,
chr5	53936421	53990071	TCONS_00088352	1000	+	53990071	53990071	0	4	309,141,97,813,	0,22286,25730,52837,
chr5	75985331	75988297	TCONS_00087122	1000	+	75988297	75988297	0	2	768,1036,	0,1930,
chr5	79475686	79535532	TCONS_00088932	1000	-	79535532	79535532	0	6	33,246,262,208,176,10,	0,12849,41913,43690,57044,59836,
chr5	79508949	79535718	TCONS_00088933	1000	-	79535718	79535718	0	5	254,420,262,208,196,	0,1435,8650,10427,26573,
chr5	79509840	79532961	TCONS_00088934	1000	-	79532961	79532961	0	4	964,262,208,231,	0,7759,9536,22890,
chr5	79516793	79535532	TCONS_00088935	1000	-	79535532	79535532	0	4	1068,208,176,10,	0,2583,15937,18729,
chr5	79696983	79698692	TCONS_00086854	1000	-	79698692	79698692	0	2	402,1192,	0,517,
chr5	98913098	98922716	TCONS_00084223	1000	-	98922716	98922716	0	2	8338,36,	0,9582,
chr5	117812534	117814995	TCONS_00084872	1000	-	117814995	117814995	0	2	53,1142,	0,1319,
chr5	121803782	121812421	TCONS_00085135	1000	+	121812421	121812421	0	2	499,272,	0,8367,
chr5	127227233	127231340	TCONS_00087165	1000	+	127231340	127231340	0	2	2697,1228,	0,2879,
chr5	127545175	127559792	TCONS_00085144	1000	+	127559792	127559792	0	3	99,72,2584,	0,11598,12033,
chr5	127545184	127558234	TCONS_00085143	1000	+	127558234	127558234	0	3	39,72,1026,	0,11589,12024,
chr5	127547170	127558429	TCONS_00088792	1000	+	127558429	127558429	0	3	116,72,1221,	0,9603,10038,
chr5	127678124	127685561	TCONS_00084569	1000	+	127685561	127685561	0	3	167,90,2095,	0,4442,5342,
chr5	127681625	127685593	TCONS_00084570	1000	+	127685593	127685593	0	2	1031,2127,	0,1841,
chr5	135079656	135084556	TCONS_00085662	1000	+	135084556	135084556	0	2	93,707,	0,4193,
chr5	144548041	144550075	TCONS_00085693	1000	+	144550075	144550075	0	2	969,731,	0,1303,
chr5	145032531	145033347	TCONS_00088989	1000	-	145033347	145033347	0	2	29,230,	0,586,
chr5	146276744	146315353	TCONS_00088227	1000	-	146315353	146315353	0	7	2058,55,189,176,37,213,31,	0,2403,5513,5866,31029,32289,38578,
chr5	146276768	146280268	TCONS_00088620	1000	-	146280268	146280268	0	3	1660,246,1121,	0,1787,2379,
chr5	146276807	146320105	TCONS_00086939	1000	-	146320105	146320105	0	10	543,589,2139,190,189,176,86,37,213,48,	0,1405,2340,4775,5450,5803,10678,30966,32226,43250,
chr5	146276815	146337964	TCONS_00084923	1000	-	146337964	146337964	0	8	535,589,55,189,176,37,213,61,	0,1397,2332,5442,5795,30958,32218,61088,
chr5	146276815	146337957	TCONS_00084922	1000	-	146337957	146337957	0	9	535,589,55,189,176,37,213,62,54,	0,1397,2332,5442,5795,30958,32218,43242,61088,
chr5	146276820	146320204	TCONS_00087813	1000	-	146320204	146320204	0	7	530,589,189,176,37,213,147,	0,1392,5437,5790,30953,32213,43237,
chr5	146276820	146320204	TCONS_00087814	1000	-	146320204	146320204	0	8	530,1999,190,189,176,37,213,147,	0,1392,4762,5437,5790,30953,32213,43237,
chr5	146276879	146309527	TCONS_00083308	1000	-	146309527	146309527	0	9	471,589,55,105,189,176,37,213,164,	0,1333,2268,3227,5378,5731,30894,32154,32484,
chr5	146278385	146320204	TCONS_00087815	1000	-	146320204	146320204	0	7	1826,189,176,86,37,213,147,	0,3872,4225,9100,29388,30648,41672,
chr5	146278555	146337951	TCONS_00084304	1000	-	146337951	146337951	0	7	246,1064,189,176,37,213,48,	0,592,3702,4055,29218,30478,59348,
chr5	146281627	146330928	TCONS_00085426	1000	-	146330928	146330928	0	6	145,189,176,37,213,41,	0,630,983,26146,27406,49260,
chr5	147884709	147885816	TCONS_00084636	1000	+	147885816	147885816	0	2	689,284,	0,823,
chr5	154193228	154197548	TCONS_00082249	1000	+	154197548	154197548	0	2	785,540,	0,3780,
chr5	156439588	156443579	TCONS_00082293	1000	+	156443579	156443579	0	3	571,141,920,	0,1287,3071,
chr5	156440657	156443237	TCONS_00084671	1000	+	156443237	156443237	0	3	58,141,578,	0,218,2002,
chr5	156440819	156443218	TCONS_00088466	1000	+	156443218	156443218	0	2	197,559,	0,1840,
chr5	156737033	156739278	TCONS_00085973	1000	-	156739278	156739278	0	3	368,176,471,	0,468,1774,
chr5	160731052	160752073	TCONS_00084701	1000	+	160752073	160752073	0	5	60,138,121,260,1003,	0,447,699,2329,20018,
chr5	160731738	160752073	TCONS_00082372	1000	+	160752073	160752073	0	3	134,260,1003,	0,1643,19332,
chr5	160731774	160734567	TCONS_00087680	1000	+	160734567	160734567	0	2	98,1186,	0,1607,
chr5	160732520	160752073	TCONS_00082373	1000	+	160752073	160752073	0	3	69,260,1003,	0,861,18550,
chr5	162346677	162348371	TCONS_00088277	1000	-	162348371	162348371	0	2	75,511,	0,1183,
chr5	164953702	164961057	TCONS_00086746	1000	+	164961057	164961057	0	5	1190,183,109,90,1358,	0,2174,3223,5180,5997,
chr5	164953702	164956949	TCONS_00086745	1000	+	164956949	164956949	0	2	1190,1073,	0,2174,
chr5	164954042	164960845	TCONS_00084056	1000	+	164960845	164960845	0	4	850,169,90,1146,	0,1834,4840,5657,
chr5	164954042	164958874	TCONS_00088867	1000	+	164958874	164958874	0	3	850,169,48,	0,1834,4784,
chr5	164954398	164960804	TCONS_00088087	1000	+	164960804	164960804	0	4	494,181,90,1105,	0,1480,4484,5301,
chr5	164954856	164957343	TCONS_00082422	1000	+	164957343	164957343	0	3	36,183,418,	0,1020,2069,
chr5	164955024	164960999	TCONS_00082423	1000	+	164960999	164960999	0	5	49,183,109,90,1300,	0,852,1901,3858,4675,
chr5	164956799	164960999	TCONS_00082424	1000	+	164960999	164960999	0	4	235,740,46,1300,	0,1433,2280,2900,
chr5	164958224	164960999	TCONS_00082425	1000	+	164960999	164960999	0	2	748,1300,	0,1475,
chr5	165170858	165173894	TCONS_00083598	1000	-	165173894	165173894	0	2	144,2151,	0,885,
chr5	165726467	165730799	TCONS_00084401	1000	-	165730799	165730799	0	2	2772,1183,	0,3149,
chr5	165726730	165728540	TCONS_00089045	1000	-	165728540	165728540	0	2	1044,52,	0,1758,
chr5	170623407	170625655	TCONS_00084416	1000	-	170625655	170625655	0	2	1858,97,	0,2151,
chr5	172726674	172727818	TCONS_00087701	1000	+	172727818	172727818	0	2	31,710,	0,434,
chr6	39310867	39327214	TCONS_00092989	1000	-	39327214	39327214	0	2	5688,207,	0,16140,
chr6	39310867	39326266	TCONS_00094302	1000	-	39326266	39326266	0	2	4847,101,	0,15298,
chr6	39310869	39346826	TCONS_00094591	1000	-	39346826	39346826	0	2	1463,155,	0,35802,
chr6	39311619	39348524	TCONS_00093993	1000	-	39348524	39348524	0	4	701,91,8,180,	0,11672,27796,36725,
chr6	39413588	39461601	TCONS_00091229	1000	+	39461601	39461601	0	3	20,199,111,	0,47274,47902,
chr6	56964258	57030686	TCONS_00091681	1000	+	57030686	57030686	0	3	115,144,57,	0,1609,66371,
chr6	65138819	65143589	TCONS_00089369	1000	+	65143589	65143589	0	2	408,1752,	0,3018,
chr6	65138839	65173925	TCONS_00093840	1000	+	65173925	65173925	0	5	388,778,92,237,654,	0,2998,7043,33712,34432,
chr6	2954180	2961261	TCONS_00093474	1000	+	2961261	2961261	0	3	20,169,1047,	0,3723,6034,
chr6	2957866	2961261	TCONS_00089099	1000	+	2961261	2961261	0	2	206,1047,	0,2348,
chr6	4861628	4862706	TCONS_00094424	1000	+	4862706	4862706	0	2	116,268,	0,810,
chr6	4861667	4874869	TCONS_00092057	1000	+	4874869	4874869	0	5	77,102,90,490,286,	0,810,10922,12061,12916,
chr6	8793026	8795713	TCONS_00089939	1000	-	8795713	8795713	0	2	1504,277,	0,2410,
chr6	8793121	8806419	TCONS_00094276	1000	-	8806419	8806419	0	3	1409,261,515,	0,2315,12783,
chr6	8793181	8809798	TCONS_00093649	1000	-	8809798	8809798	0	5	1349,261,45,40,503,	0,2255,12723,14458,16114,
chr6	8793181	8809351	TCONS_00091417	1000	-	8809351	8809351	0	4	1349,261,45,56,	0,2255,12723,16114,
chr6	8793982	8802454	TCONS_00092953	1000	-	8802454	8802454	0	3	548,261,55,	0,1454,8417,
chr6	21063234	21068401	TCONS_00089951	1000	-	21068401	21068401	0	2	31,575,	0,4592,
chr6	39339372	39348611	TCONS_00091052	1000	-	39348611	39348611	0	3	43,8,267,	0,7390,8972,
chr6	39459328	39461643	TCONS_00091659	1000	+	39461643	39461643	0	3	67,63,90,	0,551,2225,
chr6	39534128	39537723	TCONS_00091458	1000	-	39537723	39537723	0	2	2610,51,	0,3544,
chr6	40294830	40308481	TCONS_00090100	1000	-	40308481	40308481	0	3	1031,87,474,	0,5898,13177,
chr6	40300528	40308247	TCONS_00093340	1000	-	40308247	40308247	0	2	287,240,	0,7479,
chr6	43460733	43470993	TCONS_00091462	1000	-	43470993	43470993	0	5	194,1033,98,353,196,	0,4199,5903,6516,10064,
chr6	43460733	43466933	TCONS_00092996	1000	-	43466933	43466933	0	3	194,1033,297,	0,4199,5903,
chr6	43463664	43471008	TCONS_00091463	1000	-	43471008	43471008	0	5	2301,98,353,1164,211,	0,2972,3585,4151,7133,
chr6	43463667	43471079	TCONS_00094310	1000	-	43471079	43471079	0	6	2298,98,46,601,156,282,	0,2969,3582,3988,5156,7130,
chr6	43463667	43471079	TCONS_00094311	1000	-	43471079	43471079	0	6	2298,98,353,441,156,282,	0,2969,3582,4148,5156,7130,
chr6	43463667	43469290	TCONS_00094309	1000	-	43469290	43469290	0	4	2298,98,353,467,	0,2969,3582,5156,
chr6	43463691	43471027	TCONS_00092306	1000	-	43471027	43471027	0	5	2274,95,171,1324,230,	0,2945,3558,3964,7106,
chr6	43463691	43471027	TCONS_00092307	1000	-	43471027	43471027	0	5	2274,95,353,1164,230,	0,2945,3558,4124,7106,
chr6	43463728	43471388	TCONS_00092305	1000	-	43471388	43471388	0	4	2237,95,353,591,	0,2908,3521,7069,
chr6	43463827	43470955	TCONS_00091899	1000	-	43470955	43470955	0	4	2138,98,1730,158,	0,2809,3422,6970,
chr6	43463827	43470955	TCONS_00094597	1000	-	43470955	43470955	0	5	2138,98,353,1181,158,	0,2809,3422,3988,6970,
chr6	43463827	43469966	TCONS_00092304	1000	-	43469966	43469966	0	3	2138,98,2717,	0,2809,3422,
chr6	43464278	43468239	TCONS_00090107	1000	-	43468239	43468239	0	3	1687,95,990,	0,2358,2971,
chr6	43464294	43466844	TCONS_00091898	1000	-	43466844	43466844	0	3	1671,98,22,	0,2342,2528,
chr6	43482346	43500483	TCONS_00091057	1000	-	43500483	43500483	0	2	2411,172,	0,17965,
chr6	43482346	43500155	TCONS_00092650	1000	-	43500155	43500155	0	2	2411,110,	0,17699,
chr6	52188755	52232349	TCONS_00089290	1000	+	52232349	52232349	0	2	5185,68,	0,43526,
chr6	52833902	52835846	TCONS_00090139	1000	-	52835846	52835846	0	2	1105,49,	0,1895,
chr6	56960588	56966210	TCONS_00089309	1000	+	56966210	56966210	0	3	42,115,343,	0,3670,5279,
chr6	56960596	56994813	TCONS_00093835	1000	+	56994813	56994813	0	4	34,115,144,36,	0,3662,5271,34181,
chr6	56963936	57005441	TCONS_00092480	1000	+	57005441	57005441	0	3	437,144,48,	0,1931,41457,
chr6	58515038	58521151	TCONS_00092818	1000	+	58521151	58521151	0	2	5400,593,	0,5520,
chr6	60664165	60671711	TCONS_00089341	1000	+	60671711	60671711	0	2	106,1768,	0,5778,
chr6	62054941	62056345	TCONS_00091082	1000	-	62056345	62056345	0	2	805,403,	0,1001,
chr6	62066339	62078125	TCONS_00094011	1000	-	62078125	62078125	0	2	10183,43,	0,11743,
chr6	62067428	62073480	TCONS_00091083	1000	-	62073480	62073480	0	3	2201,78,811,	0,3069,5241,
chr6	62067450	62075201	TCONS_00092324	1000	-	62075201	62075201	0	2	3125,2532,	0,5219,
chr6	62067450	62073508	TCONS_00092323	1000	-	62073508	62073508	0	3	2179,2364,24,	0,3047,6034,
chr6	62067775	62081692	TCONS_00094613	1000	-	62081692	62081692	0	4	1854,122,167,64,	0,7460,8580,13853,
chr6	62067829	62073397	TCONS_00090185	1000	-	62073397	62073397	0	3	1800,2364,32,	0,2668,5536,
chr6	65145307	65173461	TCONS_00092829	1000	+	65173461	65173461	0	3	667,237,190,	0,27244,27964,
chr6	85210109	85223826	TCONS_00092841	1000	+	85223826	85223826	0	2	42,664,	0,13053,
chr6	86905165	86942469	TCONS_00094628	1000	-	86942469	86942469	0	5	702,196,74,127,262,	0,15989,16627,21005,37042,
chr6	113563982	113565334	TCONS_00093215	1000	+	113565334	113565334	0	2	328,442,	0,910,
chr6	115020221	115025340	TCONS_00090378	1000	-	115025340	115025340	0	2	2239,2817,	0,2302,
chr6	115695611	115699095	TCONS_00092884	1000	+	115699095	115699095	0	2	138,426,	0,3058,
chr6	115867956	115873854	TCONS_00090385	1000	-	115873854	115873854	0	3	4972,96,205,	0,5403,5693,
chr6	121552328	121599619	TCONS_00089675	1000	+	121599619	121599619	0	2	18328,28853,	0,18438,
chr6	121552332	121599655	TCONS_00093911	1000	+	121599655	121599655	0	3	18324,8208,20557,	0,18434,26766,
chr6	121552358	121573056	TCONS_00092565	1000	+	121573056	121573056	0	2	18298,2296,	0,18402,
chr6	122396318	122414656	TCONS_00093581	1000	+	122414656	122414656	0	2	3556,13991,	0,4347,
chr6	136497503	136521729	TCONS_00092742	1000	-	136521729	136521729	0	2	67,3265,	0,20961,
chr6	136516291	136521729	TCONS_00092743	1000	-	136521729	136521729	0	2	175,3265,	0,2173,
chr6	137830080	137836364	TCONS_00091579	1000	-	137836364	137836364	0	2	882,433,	0,5851,
chr6	143033198	143035648	TCONS_00089782	1000	+	143035648	143035648	0	2	335,1486,	0,964,
chr6	143035596	143054570	TCONS_00092585	1000	+	143054570	143054570	0	7	6462,733,3788,170,128,517,317,	0,6977,7847,11732,14642,16560,18657,
chr6	143035596	143054570	TCONS_00092586	1000	+	143054570	143054570	0	6	2185,184,2642,804,1215,7242,	0,2495,3820,6906,7847,11732,
chr6	143035648	143054405	TCONS_00093265	1000	+	143054405	143054405	0	4	2133,5215,110,9926,	0,2443,7795,8831,
chr6	143035788	143047778	TCONS_00090970	1000	+	143047778	143047778	0	6	2487,99,205,384,110,3299,	0,6171,6714,7134,7655,8691,
chr6	143038338	143047778	TCONS_00090971	1000	+	143047778	143047778	0	4	4729,138,4055,187,	0,4830,5105,9253,
chr6	143041194	143052307	TCONS_00091375	1000	+	143052307	143052307	0	4	864,804,4055,4716,	0,1308,2249,6397,
chr6	145477481	145484733	TCONS_00094695	1000	-	145484733	145484733	0	2	1674,2769,	0,4483,
chr6	145477482	145484770	TCONS_00091607	1000	-	145484770	145484770	0	2	2185,2156,	0,5132,
chr6	145477488	145484887	TCONS_00093456	1000	-	145484887	145484887	0	2	1841,2751,	0,4648,
chr6	146993745	146996958	TCONS_00094256	1000	+	146996958	146996958	0	2	2605,183,	0,3030,
chr7	39040546	39246530	TCONS_00101453	1000	-	39246530	39246530	0	4	2974,177,80,67,	0,49094,114394,205917,
chr7	39042636	39246566	TCONS_00098227	1000	-	39246566	39246566	0	3	884,177,103,	0,47004,203827,
chr7	39042732	39246566	TCONS_00100765	1000	-	39246566	39246566	0	3	788,222,103,	0,46863,203731,
chr7	39043100	39155142	TCONS_00097756	1000	-	39155142	39155142	0	3	420,177,202,	0,46540,111840,
chr7	39088883	39246558	TCONS_00098708	1000	-	39246558	39246558	0	3	934,80,95,	0,66057,157580,
chr7	39088992	39246566	TCONS_00099553	1000	-	39246566	39246566	0	2	825,103,	0,157471,
chr7	43280076	43456528	TCONS_00098034	1000	+	43456528	43456528	0	2	308,63,	0,176389,
chr7	52703783	52869672	TCONS_00098239	1000	-	52869672	52869672	0	4	988,408,53,1,	0,43130,138546,165888,
chr7	52719644	52969112	TCONS_00101463	1000	-	52969112	52969112	0	4	701,408,54,578,	0,27269,122685,248890,
chr7	52719667	52968794	TCONS_00097765	1000	-	52968794	52968794	0	4	678,408,53,260,	0,27246,122662,248867,
chr7	52741539	52842327	TCONS_00096946	1000	+	52842327	52842327	0	3	2868,2749,2,	0,3029,100786,
chr7	52741540	52842327	TCONS_00100209	1000	+	52842327	52842327	0	3	2867,2745,2,	0,3032,100785,
chr7	52741558	52969135	TCONS_00098240	1000	-	52969135	52969135	0	3	5763,53,601,	0,100771,226976,
chr7	52741558	52969135	TCONS_00101131	1000	-	52969135	52969135	0	3	5763,145,601,	0,100679,226976,
chr7	52741558	52968479	TCONS_00100380	1000	-	52968479	52968479	0	3	5763,53,71,	0,100771,226850,
chr7	52746955	52967904	TCONS_00099141	1000	-	52967904	52967904	0	3	366,53,227,	0,95374,220722,
chr7	97923939	98069947	TCONS_00101171	1000	-	98069947	98069947	0	6	26,201,380,90,253,68,	0,2464,44606,45555,48368,145940,
chr7	97968378	98060350	TCONS_00096298	1000	-	98060350	98060350	0	4	547,90,253,50,	0,1116,3929,91922,
chr7	103219566	103441627	TCONS_00099832	1000	+	103441627	103441627	0	9	389,107,103,467,86,133,195,96,1687,	0,74589,74800,75198,142289,212942,213203,214409,220374,
chr7	103219669	103440460	TCONS_00101013	1000	+	103440460	103440460	0	9	286,107,103,236,120,133,195,96,520,	0,74486,74697,75095,75442,212839,213100,214306,220271,
chr7	103219755	103434313	TCONS_00100646	1000	+	103434313	103434313	0	9	200,107,103,213,120,86,133,195,338,	0,74400,74611,75009,75356,142100,212753,213014,214220,
chr7	103219774	103441673	TCONS_00095277	1000	+	103441673	103441673	0	10	181,107,103,236,120,86,133,212,96,1733,	0,74381,74592,74990,75337,142081,212734,212978,214201,220166,
chr7	103219784	103440545	TCONS_00096994	1000	+	103440545	103440545	0	6	171,107,103,456,96,605,	0,74371,74582,212724,214191,220156,
chr7	103219789	103297847	TCONS_00098530	1000	+	103297847	103297847	0	5	166,107,103,236,2736,	0,74366,74577,74975,75322,
chr7	103219810	103294729	TCONS_00097582	1000	+	103294729	103294729	0	3	145,107,363,	0,74345,74556,
chr7	103221016	103440731	TCONS_00098988	1000	+	103440731	103440731	0	6	162,107,103,456,96,791,	0,73139,73350,211492,212959,218924,
chr7	103294504	103440460	TCONS_00101015	1000	+	103440460	103440460	0	6	496,120,133,195,96,520,	0,607,138004,138265,139471,145436,
chr7	103407179	103441925	TCONS_00101346	1000	+	103441925	103441925	0	4	71,456,96,1985,	0,25329,26796,32761,
chr7	103592664	103694676	TCONS_00098080	1000	+	103694676	103694676	0	2	619,296,	0,101716,
chr7	116128915	116152371	TCONS_00095309	1000	+	116152371	116152371	0	2	514,330,	0,23126,
chr7	451545	482954	TCONS_00097435	1000	+	482954	482954	0	3	61,29,1545,	0,378,29864,
chr7	457937	483193	TCONS_00094705	1000	+	483193	483193	0	2	57,1784,	0,23472,
chr7	481063	488345	TCONS_00099315	1000	+	488345	488345	0	2	1734,43,	0,7239,
chr7	2763735	2764661	TCONS_00099474	1000	-	2764661	2764661	0	2	382,241,	0,685,
chr7	2763839	2764447	TCONS_00098153	1000	-	2764447	2764447	0	2	284,27,	0,581,
chr7	3047499	3064848	TCONS_00096856	1000	+	3064848	3064848	0	3	167,64,430,	0,1965,16919,
chr7	3049462	3064841	TCONS_00098904	1000	+	3064841	3064841	0	2	66,423,	0,14956,
chr7	11425562	11427730	TCONS_00099481	1000	-	11427730	11427730	0	2	68,1753,	0,415,
chr7	11963777	11978663	TCONS_00097976	1000	+	11978663	11978663	0	3	1561,5082,8094,	0,1644,6792,
chr7	12418702	12424141	TCONS_00100331	1000	-	12424141	12424141	0	2	171,1729,	0,3710,
chr7	12421440	12424186	TCONS_00099925	1000	-	12424186	12424186	0	2	38,1172,	0,1574,
chr7	12421703	12424054	TCONS_00095798	1000	-	12424054	12424054	0	2	1212,1040,	0,1311,
chr7	13264505	13286202	TCONS_00097485	1000	+	13286202	13286202	0	2	461,161,	0,21536,
chr7	15266479	15269932	TCONS_00098922	1000	+	15269932	15269932	0	2	753,577,	0,2876,
chr7	15962482	15965438	TCONS_00098672	1000	-	15965438	15965438	0	2	326,2519,	0,437,
chr7	19283416	19299316	TCONS_00099524	1000	-	19299316	19299316	0	2	56,487,	0,15413,
chr7	23177043	23184739	TCONS_00096915	1000	+	23184739	23184739	0	3	1264,334,491,	0,5581,7205,
chr7	23177287	23185021	TCONS_00096916	1000	+	23185021	23185021	0	2	1020,2397,	0,5337,
chr7	23177322	23182321	TCONS_00094959	1000	+	23182321	23182321	0	3	711,203,44,	0,782,4955,
chr7	23177324	23185034	TCONS_00098004	1000	+	23185034	23185034	0	3	709,203,2410,	0,780,5300,
chr7	23177324	23182320	TCONS_00098927	1000	+	23182320	23182320	0	2	983,43,	0,4953,
chr7	23182755	23185566	TCONS_00098466	1000	+	23185566	23185566	0	2	203,1318,	0,1493,
chr7	26556545	26557534	TCONS_00100190	1000	+	26557534	26557534	0	2	871,38,	0,951,
chr7	27104277	27115154	TCONS_00098934	1000	+	27115154	27115154	0	4	200,635,147,119,	0,2210,5433,10758,
chr7	27105911	27109536	TCONS_00100583	1000	+	27109536	27109536	0	3	186,635,261,	0,576,3364,
chr7	27106000	27109849	TCONS_00094984	1000	+	27109849	27109849	0	3	97,635,139,	0,487,3710,
chr7	27106358	27109985	TCONS_00098468	1000	+	27109985	27109985	0	2	764,707,	0,2920,
chr7	27936932	27962869	TCONS_00101306	1000	+	27962869	27962869	0	2	196,1793,	0,24144,
chr7	27960809	27994258	TCONS_00099362	1000	+	27994258	27994258	0	6	2169,163,77,133,92,941,	0,2283,2536,23958,28349,32508,
chr7	27962545	27993662	TCONS_00094996	1000	+	27993662	27993662	0	5	710,77,133,92,345,	0,800,22222,26613,30772,
chr7	27962952	27963932	TCONS_00101307	1000	+	27963932	27963932	0	2	303,587,	0,393,
chr7	28088268	28099742	TCONS_00094998	1000	+	28099742	28099742	0	2	135,669,	0,10805,
chr7	30124420	30126048	TCONS_00101109	1000	-	30126048	30126048	0	2	182,1027,	0,601,
chr7	30587317	30590285	TCONS_00097735	1000	-	30590285	30590285	0	2	2280,13,	0,2955,
chr7	30587948	30590299	TCONS_00098688	1000	-	30590299	30590299	0	2	1714,27,	0,2324,
chr7	30587948	30589793	TCONS_00095977	1000	-	30589793	30589793	0	2	244,1246,	0,599,
chr7	30587965	30590298	TCONS_00099966	1000	-	30590298	30590298	0	3	227,1050,26,	0,582,2307,
chr7	32865853	32894708	TCONS_00100365	1000	-	32894708	32894708	0	3	843,132,1055,	0,4456,27800,
chr7	32955636	32984835	TCONS_00099968	1000	-	32984835	32984835	0	2	103,1425,	0,27774,
chr7	34145148	34148041	TCONS_00100594	1000	+	34148041	34148041	0	2	87,2486,	0,407,
chr7	36484431	36507622	TCONS_00098225	1000	-	36507622	36507622	0	4	244,78,112,887,	0,10385,21071,22304,
chr7	36525152	36532664	TCONS_00100764	1000	-	36532664	36532664	0	2	1915,1410,	0,6102,
chr7	39086084	39134892	TCONS_00101122	1000	-	39134892	39134892	0	2	3733,957,	0,47851,
chr7	39089075	39095636	TCONS_00096011	1000	-	39095636	39095636	0	2	742,71,	0,6490,
chr7	39133715	39157049	TCONS_00101454	1000	-	39157049	39157049	0	2	360,2109,	0,21225,
chr7	43651834	43663279	TCONS_00100206	1000	+	43663279	43663279	0	2	70,6471,	0,4974,
chr7	52741540	52747346	TCONS_00097540	1000	+	52747346	52747346	0	2	2922,2719,	0,3087,
chr7	52741558	52747349	TCONS_00099379	1000	+	52747349	52747349	0	2	2959,2777,	0,3014,
chr7	53667115	53693109	TCONS_00095094	1000	+	53693109	53693109	0	2	4655,20698,	0,5296,
chr7	62557135	62570287	TCONS_00095135	1000	+	62570287	62570287	0	2	2767,1286,	0,11866,
chr7	62558881	62567985	TCONS_00095136	1000	+	62567985	62567985	0	2	4622,3994,	0,5110,
chr7	62561034	62564858	TCONS_00098957	1000	+	62564858	62564858	0	3	27,127,867,	0,2342,2957,
chr7	63028636	63044205	TCONS_00100996	1000	+	63044205	63044205	0	3	3241,145,24,	0,14437,15545,
chr7	75422172	75425151	TCONS_00100018	1000	-	75425151	75425151	0	2	790,1613,	0,1366,
chr7	97923231	97926592	TCONS_00100427	1000	-	97926592	97926592	0	2	766,189,	0,3172,
chr7	97923350	97972560	TCONS_00100036	1000	-	97972560	97972560	0	5	647,201,380,90,253,	0,3053,45195,46144,48957,
chr7	97968341	98026698	TCONS_00100428	1000	-	98026698	98026698	0	4	584,90,253,46,	0,1153,3966,58311,
chr7	97968345	97982863	TCONS_00101172	1000	-	97982863	97982863	0	4	580,90,253,87,	0,1149,3962,14431,
chr7	98306376	98310799	TCONS_00096299	1000	-	98310799	98310799	0	2	2946,660,	0,3763,
chr7	98306376	98310799	TCONS_00096300	1000	-	98310799	98310799	0	3	2946,124,301,	0,3763,4122,
chr7	98308036	98310612	TCONS_00101173	1000	-	98310612	98310612	0	3	1286,124,220,	0,2103,2356,
chr7	98308130	98310539	TCONS_00097269	1000	-	98310539	98310539	0	3	1192,126,41,	0,2007,2368,
chr7	100180365	100182337	TCONS_00101176	1000	-	100182337	100182337	0	2	399,1325,	0,647,
chr7	100182623	100196085	TCONS_00100042	1000	-	100196085	100196085	0	3	1722,58,947,	0,11159,12515,
chr7	100183428	100196019	TCONS_00101177	1000	-	100196019	100196019	0	4	917,58,80,119,	0,10354,11710,12472,
chr7	103590853	103597038	TCONS_00099834	1000	+	103597038	103597038	0	3	87,627,70,	0,1803,6115,
chr7	103592658	103609350	TCONS_00098079	1000	+	103609350	103609350	0	2	625,139,	0,16553,
chr7	103592659	103602197	TCONS_00098534	1000	+	103602197	103602197	0	3	624,148,115,	0,4309,9423,
chr7	103592661	103597577	TCONS_00095278	1000	+	103597577	103597577	0	2	622,609,	0,4307,
chr7	103592664	103602107	TCONS_00100648	1000	+	103602107	103602107	0	2	619,25,	0,9418,
chr7	114262646	114272893	TCONS_00100443	1000	-	114272893	114272893	0	2	1536,7762,	0,2485,
chr7	115489387	115519628	TCONS_00101185	1000	-	115519628	115519628	0	4	882,93,123,24,	0,1867,29935,30217,
chr7	115489534	115523853	TCONS_00099622	1000	-	115523853	115523853	0	4	735,93,352,99,	0,1720,29788,34220,
chr7	115519637	115527563	TCONS_00100842	1000	-	115527563	115527563	0	4	37,120,63,89,	0,4117,6153,7837,
chr7	115716545	115734529	TCONS_00098793	1000	-	115734529	115734529	0	2	16650,1167,	0,16817,
chr7	115822645	115850734	TCONS_00100255	1000	+	115850734	115850734	0	2	212,7022,	0,21067,
chr7	115822653	115851310	TCONS_00095303	1000	+	115851310	115851310	0	3	204,146,5241,	0,21059,23416,
chr7	115842165	115850734	TCONS_00100256	1000	+	115850734	115850734	0	2	62,7022,	0,1547,
chr7	119893257	119922189	TCONS_00099246	1000	-	119922189	119922189	0	2	4395,138,	0,28794,
chr7	120304080	120305070	TCONS_00100665	1000	+	120305070	120305070	0	2	720,170,	0,820,
chr7	120756816	120761811	TCONS_00100272	1000	+	120761811	120761811	0	2	222,4621,	0,374,
chr7	121853693	121862268	TCONS_00096566	1000	-	121862268	121862268	0	2	3261,584,	0,7991,
chr7	126199323	126210172	TCONS_00097048	1000	+	126210172	126210172	0	3	77,505,2025,	0,7907,8824,
chr7	126207161	126210244	TCONS_00095514	1000	+	126210244	126210244	0	2	574,2097,	0,986,
chr7	129869653	129877073	TCONS_00101568	1000	-	129877073	129877073	0	2	21,2128,	0,5292,
chr7	134145910	134148846	TCONS_00101575	1000	-	134148846	134148846	0	2	256,339,	0,2597,
chr7	137267927	137270969	TCONS_00095582	1000	+	137270969	137270969	0	2	167,2763,	0,279,
chr7	137283857	137288001	TCONS_00095583	1000	+	137288001	137288001	0	2	3321,687,	0,3457,
chr7	137283857	137288001	TCONS_00097641	1000	+	137288001	137288001	0	2	3328,687,	0,3457,
chr7	137284121	137284790	TCONS_00099458	1000	+	137284790	137284790	0	2	44,564,	0,105,
chr7	137286326	137288279	TCONS_00100308	1000	+	137288279	137288279	0	2	852,966,	0,987,
chr8	95364523	95513888	TCONS_00104744	1000	-	95513888	95513888	0	5	165,2119,184,200,1002,	0,3219,6517,17804,148363,
chr8	13759890	13772200	TCONS_00106697	1000	+	13772200	13772200	0	2	9767,1539,	0,10771,
chr8	44955642	44970142	TCONS_00104890	1000	+	44970142	44970142	0	2	847,103,	0,14397,
chr8	44955680	44979224	TCONS_00107494	1000	+	44979224	44979224	0	4	809,63,197,481,	0,20224,21135,23063,
chr8	44955680	44976114	TCONS_00107493	1000	+	44976114	44976114	0	2	809,210,	0,20224,
chr8	44955848	44979150	TCONS_00108227	1000	+	44979150	44979150	0	5	641,120,41,197,407,	0,14191,14643,20967,22895,
chr8	44955848	44979150	TCONS_00108228	1000	+	44979150	44979150	0	6	641,120,41,63,197,407,	0,14191,14643,20056,20967,22895,
chr8	44955877	44977032	TCONS_00103737	1000	+	44977032	44977032	0	5	612,52,41,63,217,	0,14230,14614,20027,20938,
chr8	44955877	44977032	TCONS_00103738	1000	+	44977032	44977032	0	4	612,52,41,217,	0,14230,14614,20938,
chr8	44955878	44979219	TCONS_00101839	1000	+	44979219	44979219	0	3	611,197,476,	0,20937,22865,
chr8	51116212	51202405	TCONS_00101907	1000	+	51202405	51202405	0	3	450,695,512,	0,82609,85681,
chr8	51116396	51200550	TCONS_00103756	1000	+	51200550	51200550	0	2	266,1729,	0,82425,
chr8	51116428	51171608	TCONS_00107147	1000	+	51171608	51171608	0	2	234,230,	0,54950,
chr8	51116441	51172731	TCONS_00104392	1000	+	51172731	51172731	0	3	221,767,52,	0,54937,56238,
chr8	90295573	90344961	TCONS_00102228	1000	+	90344961	90344961	0	4	151,178,1754,704,	0,37741,39489,48684,
chr8	90295573	90344961	TCONS_00107565	1000	+	90344961	90344961	0	4	151,1754,167,331,	0,39489,48684,49057,
chr8	95129955	95369914	TCONS_00106617	1000	-	95369914	95369914	0	3	44,134,2172,	0,234599,237787,
chr8	130787347	130879478	TCONS_00105573	1000	+	130879478	130879478	0	3	668,143,1183,	0,79115,90948,
chr8	21696660	21701316	TCONS_00106029	1000	-	21701316	21701316	0	2	1067,1412,	0,3244,
chr8	32980011	32983039	TCONS_00103721	1000	+	32983039	32983039	0	2	970,1456,	0,1572,
chr8	35940631	35992044	TCONS_00107488	1000	+	35992044	35992044	0	3	2060,570,82,	0,18994,51331,
chr8	36400066	36404459	TCONS_00108050	1000	-	36404459	36404459	0	2	775,1412,	0,2981,
chr8	44976402	44979224	TCONS_00104376	1000	+	44979224	44979224	0	2	610,481,	0,2341,
chr8	45726684	45732196	TCONS_00102908	1000	-	45732196	45732196	0	2	3719,1296,	0,4216,
chr8	51171760	51202395	TCONS_00107507	1000	+	51202395	51202395	0	3	385,695,502,	0,27061,30133,
chr8	54285116	54291782	TCONS_00105864	1000	+	54291782	54291782	0	4	869,101,139,146,	0,3172,5726,6520,
chr8	54288294	54292857	TCONS_00105395	1000	+	54292857	54292857	0	4	95,139,137,889,	0,2548,3342,3674,
chr8	54291385	54294072	TCONS_00107510	1000	+	54294072	54294072	0	2	814,1110,	0,1577,
chr8	63080796	63087698	TCONS_00108093	1000	-	63087698	63087698	0	4	1036,292,71,74,	0,4377,5002,6828,
chr8	63081659	63085378	TCONS_00103134	1000	-	63085378	63085378	0	2	1855,243,	0,3476,
chr8	70611956	70622291	TCONS_00103198	1000	-	70622291	70622291	0	2	1434,2928,	0,7407,
chr8	71926334	71931163	TCONS_00104704	1000	-	71931163	71931163	0	2	1178,1094,	0,3735,
chr8	71927456	71929254	TCONS_00107368	1000	-	71929254	71929254	0	2	56,494,	0,1304,
chr8	72066494	72071100	TCONS_00104948	1000	+	72071100	72071100	0	2	259,716,	0,3890,
chr8	90333241	90344965	TCONS_00102229	1000	+	90344965	90344965	0	3	251,1754,708,	0,1821,11016,
chr8	90333268	90338896	TCONS_00105471	1000	+	90338896	90338896	0	4	224,1754,153,38,	0,1794,5164,5590,
chr8	90335701	90344638	TCONS_00104980	1000	+	90344638	90344638	0	2	1115,382,	0,8555,
chr8	93758062	93759641	TCONS_00103351	1000	-	93759641	93759641	0	2	1222,230,	0,1349,
chr8	95245146	95246568	TCONS_00107041	1000	-	95246568	95246568	0	2	295,808,	0,614,
chr8	95355320	95369758	TCONS_00108144	1000	-	95369758	95369758	0	3	24,134,2016,	0,9234,12422,
chr8	95364526	95370399	TCONS_00106157	1000	-	95370399	95370399	0	2	162,2657,	0,3216,
chr8	95366796	95369301	TCONS_00105731	1000	-	95369301	95369301	0	2	348,1559,	0,946,
chr8	95366906	95383164	TCONS_00107043	1000	-	95383164	95383164	0	4	209,2119,184,837,	0,836,4134,15421,
chr8	95495834	95514390	TCONS_00103365	1000	-	95514390	95514390	0	2	6671,1504,	0,17052,
chr8	96058893	96071690	TCONS_00107400	1000	-	96071690	96071690	0	2	158,582,	0,12215,
chr8	99133692	99142562	TCONS_00102279	1000	+	99142562	99142562	0	2	329,1015,	0,7855,
chr8	113422651	113426620	TCONS_00105755	1000	-	113426620	113426620	0	3	2349,186,293,	0,3205,3676,
chr8	113424181	113426620	TCONS_00103474	1000	-	113426620	113426620	0	2	1861,293,	0,2146,
chr8	121557745	121559516	TCONS_00103964	1000	+	121559516	121559516	0	2	745,734,	0,1037,
chr8	127111973	127115685	TCONS_00103622	1000	-	127115685	127115685	0	2	2083,55,	0,3657,
chr8	128473265	128474548	TCONS_00102572	1000	+	128474548	128474548	0	2	509,395,	0,888,
chr8	128473353	128486473	TCONS_00105076	1000	+	128486473	128486473	0	3	421,149,71,	0,800,13049,
chr8	128479502	128489395	TCONS_00108007	1000	+	128489395	128489395	0	4	1280,32,227,41,	0,6900,9508,9852,
chr8	128488424	128499441	TCONS_00106904	1000	+	128499441	128499441	0	3	813,91,3802,	0,6735,7215,
chr8	128488847	128500206	TCONS_00107266	1000	+	128500206	128500206	0	3	390,64,5047,	0,507,6312,
chr8	128492068	128494096	TCONS_00104560	1000	+	128494096	128494096	0	2	330,1156,	0,872,
chr8	128494478	128500206	TCONS_00106449	1000	+	128500206	128500206	0	2	772,4567,	0,1161,
chr8	128794160	128796093	TCONS_00106000	1000	+	128796093	128796093	0	3	252,41,581,	0,1017,1352,
chr8	128794215	128796089	TCONS_00102578	1000	+	128796089	128796089	0	3	164,41,577,	0,962,1297,
chr9	14652430	14796849	TCONS_00111142	1000	-	14796849	14796849	0	4	654,87,85,75,	0,56802,143324,144344,
chr9	14652430	14796323	TCONS_00111141	1000	-	14796323	14796323	0	6	654,55,103,87,85,65,	0,48656,50148,56802,143324,143828,
chr9	14652430	14796168	TCONS_00111140	1000	-	14796168	14796168	0	7	654,55,124,148,87,85,62,	0,48656,50148,53860,56802,143324,143676,
chr9	26863035	26873747	TCONS_00112889	1000	-	26873747	26873747	0	2	160,9443,	0,1269,
chr9	26865419	26870814	TCONS_00111782	1000	-	26870814	26870814	0	2	278,2944,	0,2451,
chr9	104716388	104726782	TCONS_00109948	1000	-	104726782	104726782	0	2	64,623,	0,9771,
chr9	119403446	119511349	TCONS_00111737	1000	+	119511349	119511349	0	2	703,78,	0,107825,
chr9	6109021	6136309	TCONS_00108562	1000	+	6136309	6136309	0	5	4635,86,105,133,5320,	0,6016,18236,20938,21968,
chr9	6110931	6149767	TCONS_00112440	1000	+	6149767	6149767	0	6	2725,86,105,133,167,58,	0,4106,16326,19028,20058,38778,
chr9	6126180	6134455	TCONS_00112979	1000	+	6134455	6134455	0	3	1182,2070,3466,	0,1842,4809,
chr9	6126180	6130944	TCONS_00111285	1000	+	6130944	6130944	0	2	1182,985,	0,3779,
chr9	6126208	6132828	TCONS_00112709	1000	+	6132828	6132828	0	3	1154,133,1839,	0,3751,4781,
chr9	6126985	6135559	TCONS_00110909	1000	+	6135559	6135559	0	4	377,133,167,11,	0,2974,4004,8563,
chr9	6127451	6136309	TCONS_00108563	1000	+	6136309	6136309	0	2	2641,5320,	0,3538,
chr9	9795762	9805191	TCONS_00112311	1000	-	9805191	9805191	0	2	873,59,	0,9370,
chr9	14705942	14770271	TCONS_00111143	1000	-	14770271	14770271	0	3	496,87,131,	0,3290,64198,
chr9	16571581	16576003	TCONS_00112323	1000	-	16576003	16576003	0	2	51,627,	0,3795,
chr9	26895561	26903312	TCONS_00109536	1000	-	26903312	26903312	0	2	7093,42,	0,7709,
chr9	28361770	28389452	TCONS_00110954	1000	+	28389452	28389452	0	3	11,48,12330,	0,3818,15352,
chr9	28371912	28389452	TCONS_00110955	1000	+	28389452	28389452	0	2	5464,11701,	0,5839,
chr9	45158283	45165471	TCONS_00108853	1000	+	45165471	45165471	0	2	467,6611,	0,577,
chr9	45158724	45165471	TCONS_00112754	1000	+	45165471	45165471	0	3	26,2781,3682,	0,136,3065,
chr9	65406669	65410536	TCONS_00113037	1000	+	65410536	65410536	0	3	1127,306,79,	0,3035,3788,
chr9	66598641	66606677	TCONS_00112785	1000	+	66606677	66606677	0	2	6107,1830,	0,6206,
chr9	70737482	70740049	TCONS_00110137	1000	+	70740049	70740049	0	2	53,1291,	0,1276,
chr9	71307425	71321789	TCONS_00112239	1000	+	71321789	71321789	0	2	12409,1789,	0,12575,
chr9	98067626	98070454	TCONS_00109907	1000	-	98070454	98070454	0	2	1081,1358,	0,1470,
chr9	98067968	98070475	TCONS_00109906	1000	-	98070475	98070475	0	2	724,1379,	0,1128,
chr9	103959702	103973709	TCONS_00109280	1000	+	103973709	103973709	0	3	813,219,4258,	0,7243,9749,
chr9	103960364	103971809	TCONS_00112842	1000	+	103971809	103971809	0	3	416,219,2358,	0,6581,9087,
chr9	103960364	103967630	TCONS_00110215	1000	+	103967630	103967630	0	2	415,685,	0,6581,
chr9	103966566	103972949	TCONS_00110216	1000	+	103972949	103972949	0	2	598,3498,	0,2885,
chr9	104696785	104698171	TCONS_00113200	1000	-	104698171	104698171	0	2	770,146,	0,1240,
chr9	104727294	104785989	TCONS_00109281	1000	+	104785989	104785989	0	3	175,69,437,	0,44492,58258,
chr9	109879814	109882711	TCONS_00113415	1000	-	109882711	109882711	0	3	1672,160,143,	0,2494,2754,
chr9	110984021	110999833	TCONS_00111412	1000	+	110999833	110999833	0	3	781,53,94,	0,15462,15718,
chr9	116438905	116443783	TCONS_00111734	1000	+	116443783	116443783	0	2	1323,475,	0,4403,
chr9	119382878	119404180	TCONS_00111426	1000	+	119404180	119404180	0	3	262,138,1556,	0,18815,19746,
chr9	119401577	119404250	TCONS_00109336	1000	+	119404250	119404250	0	2	254,1626,	0,1047,
chrX	4394649	4460496	TCONS_00116632	1000	+	4460496	4460496	0	3	184,2626,7042,	0,2207,58805,
chrX	4394681	4474749	TCONS_00115961	1000	+	4474749	4474749	0	5	152,102,81,168,5374,	0,2175,4720,58773,74694,
chrX	4394692	4474740	TCONS_00115171	1000	+	4474740	4474740	0	7	141,102,81,168,657,187,604,	0,2164,4709,58762,60784,74683,79444,
chrX	4396665	4461625	TCONS_00117049	1000	+	4461625	4461625	0	3	293,81,8171,	0,2736,56789,
chrX	4397875	4474748	TCONS_00113451	1000	+	4474748	4474748	0	3	1607,2679,5373,	0,55579,71500,
chrX	4398561	4461601	TCONS_00116178	1000	+	4461601	4461601	0	2	921,8147,	0,54893,
chrX	4451730	4460496	TCONS_00115469	1000	+	4460496	4460496	0	2	639,7042,	0,1724,
chrX	4453025	4474749	TCONS_00114833	1000	+	4474749	4474749	0	2	8472,5374,	0,16350,
chrX	21623060	21633590	TCONS_00116297	1000	-	21633590	21633590	0	3	2748,1697,2627,	0,6065,7903,
chrX	21624138	21632536	TCONS_00117143	1000	-	21632536	21632536	0	2	1670,3411,	0,4987,
chrX	21624833	21628528	TCONS_00116954	1000	-	21628528	21628528	0	2	975,54,	0,3641,
chrX	21625420	21644370	TCONS_00115329	1000	-	21644370	21644370	0	3	3793,654,176,	0,5143,18774,
chrX	21625938	21633590	TCONS_00116298	1000	-	21633590	21633590	0	2	4884,2627,	0,5025,
chrX	2089587	2095705	TCONS_00114077	1000	-	2095705	2095705	0	2	370,5530,	0,588,
chrX	2831049	2838370	TCONS_00114096	1000	-	2838370	2838370	0	3	307,108,138,	0,4053,7183,
chrX	2831276	2836446	TCONS_00115575	1000	-	2836446	2836446	0	2	80,1344,	0,3826,
chrX	14086778	14089209	TCONS_00116726	1000	-	14089209	14089209	0	2	1333,27,	0,2404,
chrX	15674262	15697114	TCONS_00113480	1000	+	15697114	15697114	0	6	2624,122,80,77,78,6970,	0,3626,5158,5667,5875,15882,
chrX	15674686	15725103	TCONS_00116843	1000	+	15725103	15725103	0	8	2200,122,80,77,78,51,43,2319,	0,3202,4734,5243,5451,44204,47072,48098,
chrX	15674698	15718923	TCONS_00116641	1000	+	15718923	15718923	0	7	2188,52,80,77,78,1629,33,	0,3260,4722,5231,5439,42157,44192,
chrX	15677415	15718709	TCONS_00114845	1000	+	15718709	15718709	0	5	595,80,77,78,1854,	0,2005,2514,2722,39440,
chrX	15677693	15725022	TCONS_00115725	1000	+	15725022	15725022	0	8	317,80,77,78,1629,46,43,2238,	0,1727,2236,2444,39162,41202,44065,45091,
chrX	17863633	17864963	TCONS_00116951	1000	-	17864963	17864963	0	2	934,69,	0,1261,
chrX	17863804	17865981	TCONS_00114169	1000	-	17865981	17865981	0	3	899,72,583,	0,1090,1594,
chrX	17864085	17890628	TCONS_00114170	1000	-	17890628	17890628	0	4	482,72,100,704,	0,809,1313,25839,
chrX	17864085	17890628	TCONS_00116737	1000	-	17890628	17890628	0	4	618,72,100,704,	0,809,1313,25839,
chrX	17864187	17866245	TCONS_00116296	1000	-	17866245	17866245	0	3	380,72,847,	0,707,1211,
chrX	21627213	21629119	TCONS_00116741	1000	-	21629119	21629119	0	2	1165,645,	0,1261,
chrX	21628024	21644569	TCONS_00116955	1000	-	21644569	21644569	0	2	2585,382,	0,16163,
chrX	21629073	21631100	TCONS_00117308	1000	-	21631100	21631100	0	2	1753,137,	0,1890,
chrX	21629205	21632566	TCONS_00115016	1000	-	21632566	21632566	0	2	8,2294,	0,1067,
chrX	21629205	21632566	TCONS_00115017	1000	-	21632566	21632566	0	3	8,46,1844,	0,1358,1517,
chrX	32536922	32546481	TCONS_00113583	1000	+	32546481	32546481	0	5	371,126,147,34,1361,	0,781,1912,7785,8198,
chrX	32537216	32545704	TCONS_00115493	1000	+	32545704	32545704	0	5	77,127,147,34,558,	0,486,1618,7491,7930,
chrX	32537724	32545420	TCONS_00117245	1000	+	32545420	32545420	0	3	105,147,713,	0,1110,6983,
chrX	43838502	43840912	TCONS_00116762	1000	-	43840912	43840912	0	2	1980,311,	0,2099,
chrX	64568460	64572903	TCONS_00115520	1000	+	64572903	64572903	0	3	1083,121,1850,	0,1688,2593,
chrX	64568460	64569771	TCONS_00116451	1000	+	64569771	64569771	0	2	374,316,	0,995,
chrX	64568461	64573078	TCONS_00113701	1000	+	64573078	64573078	0	4	373,89,121,2025,	0,994,1687,2592,
chrX	64568648	64570404	TCONS_00116007	1000	+	64570404	64570404	0	2	895,256,	0,1500,
chrX	64569950	64572969	TCONS_00115521	1000	+	64572969	64572969	0	2	319,1916,	0,1103,
chrX	76810320	76831041	TCONS_00117181	1000	-	76831041	76831041	0	3	470,116,46,	0,18974,20675,
chrX	76810599	76829569	TCONS_00116995	1000	-	76829569	76829569	0	3	191,101,275,	0,8391,18695,
chrX	105458836	105462641	TCONS_00116798	1000	-	105462641	105462641	0	3	454,99,1113,	0,1340,2692,
chrX	107512687	107513811	TCONS_00115546	1000	+	107513811	107513811	0	4	76,62,55,87,	0,428,813,1037,
chrX	107512954	107513791	TCONS_00116901	1000	+	107513791	107513791	0	2	223,67,	0,770,
chrX	107521884	107544030	TCONS_00115107	1000	-	107544030	107544030	0	2	1031,638,	0,21508,
chrX	107522302	107543463	TCONS_00117369	1000	-	107543463	107543463	0	3	123,254,71,	0,359,21090,
chrX	108150824	108238932	TCONS_00113897	1000	+	108238932	108238932	0	2	867,547,	0,87561,
chrX	108151062	108253247	TCONS_00115547	1000	+	108253247	108253247	0	4	629,101,52,48,	0,87323,89305,102137,
chrX	115424180	115437842	TCONS_00114951	1000	+	115437842	115437842	0	3	342,88,189,	0,10161,13473,
chrX	115434297	115437843	TCONS_00115285	1000	+	115437843	115437843	0	2	132,190,	0,3356,
chrX	115434348	115438776	TCONS_00115792	1000	+	115438776	115438776	0	3	81,189,56,	0,3305,4372,
chrX	119290500	119295446	TCONS_00114962	1000	+	119295446	119295446	0	2	159,910,	0,4036,
chrX	119290505	119298615	TCONS_00113972	1000	+	119298615	119298615	0	3	154,156,1365,	0,4031,6745,
chrX	119290566	119298549	TCONS_00117115	1000	+	119298549	119298549	0	4	93,156,41,1031,	0,3970,6684,6952,
chrX	119293678	119312603	TCONS_00115558	1000	+	119312603	119312603	0	2	1014,147,	0,18778,
chrX	119294191	119298549	TCONS_00115795	1000	+	119298549	119298549	0	2	501,1299,	0,3059,
chrX	137791169	137793683	TCONS_00115151	1000	-	137793683	137793683	0	2	1957,480,	0,2034,
chrX	137791178	137805976	TCONS_00117218	1000	-	137805976	137805976	0	7	1948,51,153,118,40,74,109,	0,2043,2530,6652,8015,10355,14689,
chrX	137791180	137794932	TCONS_00116405	1000	-	137794932	137794932	0	2	1921,1729,	0,2023,
chrX	137791181	137793223	TCONS_00115708	1000	-	137793223	137793223	0	3	1034,165,20,	0,1780,2022,
chrX	137791186	137805951	TCONS_00117042	1000	-	137805951	137805951	0	6	1940,153,118,40,74,84,	0,2522,6644,8007,10347,14681,
chr10	8316529	8648334	TCONS_00016504	1000	-	8648334	8648334	0	3	5115,63,938,	0,30811,330867,
chr10	8319410	8648320	TCONS_00020290	1000	-	8648320	8648320	0	4	2234,91,63,924,	0,7661,27930,327986,
chr10	8321647	8648334	TCONS_00016505	1000	-	8648334	8648334	0	4	5515,109,63,938,	0,5952,25693,325749,
chr10	8325606	8648751	TCONS_00019712	1000	-	8648751	8648751	0	3	1556,63,1355,	0,21734,321790,
chr10	8346286	8648487	TCONS_00016506	1000	-	8648487	8648487	0	2	1117,1091,	0,301110,
chr10	25789350	26253611	TCONS_00023702	1000	+	26253611	26253611	0	9	287,139,190,170,51,214,126,74,135,	0,8379,278558,301703,312435,314296,317379,318187,464126,
chr10	25789350	26245951	TCONS_00023701	1000	+	26245951	26245951	0	7	287,139,190,214,126,143,50,	0,8379,278558,314296,317379,419291,456551,
chr10	26067905	26245951	TCONS_00020084	1000	+	26245951	26245951	0	8	193,99,170,214,126,156,143,50,	0,20492,23148,35741,38824,104849,140736,177996,
chr10	26067905	26245951	TCONS_00020085	1000	+	26245951	26245951	0	6	193,170,214,126,143,50,	0,23148,35741,38824,140736,177996,
chr10	26067919	26245946	TCONS_00023224	1000	+	26245946	26245946	0	8	179,170,214,126,142,171,143,45,	0,23134,35727,38810,117180,117534,140722,177982,
chr10	7680807	7768970	TCONS_00016501	1000	-	7768970	7768970	0	2	30127,75,	0,88088,
chr10	7680807	7764238	TCONS_00016500	1000	-	7764238	7764238	0	2	30127,1624,	0,81807,
chr10	7680812	7734496	TCONS_00021383	1000	-	7734496	7734496	0	2	30109,792,	0,52892,
chr10	7680812	7733744	TCONS_00020866	1000	-	7733744	7733744	0	2	30122,27,	0,52905,
chr10	7699351	7951850	TCONS_00018345	1000	-	7951850	7951850	0	2	11583,1360,	0,251139,
chr10	25789355	25826094	TCONS_00021175	1000	+	25826094	25826094	0	3	282,139,2394,	0,8374,34345,
chr10	25789363	26123497	TCONS_00017998	1000	+	26123497	26123497	0	9	274,139,190,158,214,126,85,53,43,	0,8366,278545,301702,314283,317366,328996,330559,334091,
chr10	25789363	26086958	TCONS_00017997	1000	+	26086958	26086958	0	4	274,139,190,45,	0,8366,278545,297550,
chr10	26067919	26208862	TCONS_00023222	1000	+	26208862	26208862	0	7	179,170,214,126,85,156,221,	0,23134,35727,38810,50440,104835,140722,
chr10	26067919	26208862	TCONS_00023223	1000	+	26208862	26208862	0	7	179,170,214,126,85,156,221,	0,23134,35727,38810,50707,104835,140722,
chr10	26067919	26107243	TCONS_00023221	1000	+	26107243	26107243	0	4	179,170,214,514,	0,23134,35727,38810,
chr10	26067921	26209173	TCONS_00015340	1000	+	26209173	26209173	0	4	177,214,126,532,	0,35725,38808,140720,
chr10	26067921	26185129	TCONS_00015339	1000	+	26185129	26185129	0	4	177,214,126,30,	0,35725,38808,117178,
chr10	58026798	58066993	TCONS_00020974	1000	-	58066993	58066993	0	4	636,90,65,121,	0,1612,3010,40074,
chr10	58031947	58067054	TCONS_00023973	1000	-	58067054	58067054	0	5	177,675,150,1148,182,	0,446,20480,20840,34925,
chr10	58052342	58070400	TCONS_00021490	1000	-	58070400	58070400	0	5	235,399,106,130,320,	0,445,1487,14530,17738,
chr10	58052740	58067054	TCONS_00017090	1000	-	58067054	58067054	0	3	157,880,182,	0,315,14132,
chr10	58053187	58070400	TCONS_00021491	1000	-	58070400	58070400	0	3	748,130,320,	0,13685,16893,
chr10	68745812	68947863	TCONS_00020443	1000	-	68947863	68947863	0	2	2019,3044,	0,199007,
chr10	68928991	68947428	TCONS_00017228	1000	-	68947428	68947428	0	2	17004,1286,	0,17151,
chr10	68930159	68951182	TCONS_00017229	1000	-	68951182	68951182	0	2	15581,5323,	0,15700,
chr10	68943292	68947457	TCONS_00021527	1000	-	68947457	68947457	0	2	2640,1315,	0,2850,
chr10	1941684	1943836	TCONS_00016472	1000	-	1943836	1943836	0	2	465,442,	0,1710,
chr10	5892634	5893795	TCONS_00016492	1000	-	5893795	5893795	0	2	1019,52,	0,1109,
chr10	5892636	5893822	TCONS_00019707	1000	-	5893822	5893822	0	2	972,101,	0,1085,
chr10	5892639	5893827	TCONS_00016493	1000	-	5893827	5893827	0	2	950,155,	0,1033,
chr10	7996978	8028393	TCONS_00018346	1000	-	8028393	8028393	0	2	1912,5972,	0,25443,
chr10	8013790	8023024	TCONS_00020867	1000	-	8023024	8023024	0	3	3065,118,4369,	0,4397,4865,
chr10	8017517	8028401	TCONS_00020288	1000	-	8028401	8028401	0	2	788,9746,	0,1138,
chr10	8205635	8216232	TCONS_00021653	1000	+	8216232	8216232	0	2	5307,4993,	0,5604,
chr10	8320279	8336452	TCONS_00018349	1000	-	8336452	8336452	0	2	1365,9381,	0,6792,
chr10	9363620	9364881	TCONS_00023421	1000	-	9364881	9364881	0	2	1047,74,	0,1187,
chr10	13710391	13715894	TCONS_00015244	1000	+	13715894	13715894	0	2	200,5098,	0,405,
chr10	13731029	13731896	TCONS_00019449	1000	+	13731896	13731896	0	2	179,399,	0,468,
chr10	13820250	13829881	TCONS_00021667	1000	+	13829881	13829881	0	2	8697,399,	0,9232,
chr10	21526492	21537087	TCONS_00016723	1000	-	21537087	21537087	0	3	7963,129,2330,	0,8066,8265,
chr10	21528495	21536657	TCONS_00019112	1000	-	21536657	21536657	0	2	1271,1900,	0,6262,
chr10	24654155	24668200	TCONS_00015335	1000	+	24668200	24668200	0	3	493,184,2979,	0,8940,11066,
chr10	24661884	24668271	TCONS_00021682	1000	+	24668271	24668271	0	2	1395,3050,	0,3337,
chr10	25789355	25817867	TCONS_00015338	1000	+	25817867	25817867	0	3	282,139,737,	0,8374,27775,
chr10	25789446	25797869	TCONS_00023220	1000	+	25797869	25797869	0	2	191,140,	0,8283,
chr10	26088465	26185129	TCONS_00015341	1000	+	26185129	26185129	0	7	31,170,214,126,69,156,30,	0,2588,15181,18264,63758,84289,96634,
chr10	26090854	26209173	TCONS_00015342	1000	+	26209173	26209173	0	6	369,214,126,69,170,532,	0,12792,15875,61369,94600,117787,
chr10	26090949	26208797	TCONS_00022721	1000	+	26208797	26208797	0	7	274,214,126,69,156,170,156,	0,12697,15780,61274,81805,94505,117692,
chr10	26091049	26123497	TCONS_00017999	1000	+	26123497	26123497	0	6	174,214,126,85,53,43,	0,12597,15680,27310,28873,32405,
chr10	26095362	26209956	TCONS_00021176	1000	+	26209956	26209956	0	4	16,214,126,1315,	0,8284,11367,113279,
chr10	26101769	26185195	TCONS_00023703	1000	+	26185195	26185195	0	5	67,214,126,156,96,	0,1877,4960,70985,83330,
chr10	26101802	26107396	TCONS_00020086	1000	+	26107396	26107396	0	3	34,214,667,	0,1844,4927,
chr10	26101806	26123552	TCONS_00023225	1000	+	26123552	26123552	0	4	30,214,126,98,	0,1840,4923,21648,
chr10	26103607	26118649	TCONS_00020087	1000	+	26118649	26118649	0	3	253,126,23,	0,3122,15019,
chr10	26106595	26185154	TCONS_00018001	1000	+	26185154	26185154	0	4	260,69,156,55,	0,45628,66159,78504,
chr10	28389069	28439773	TCONS_00021179	1000	+	28439773	28439773	0	2	226,634,	0,50070,
chr10	47455346	47458611	TCONS_00023017	1000	-	47458611	47458611	0	2	1085,132,	0,3133,
chr10	47458502	47465203	TCONS_00022486	1000	-	47465203	47465203	0	2	173,1835,	0,4866,
chr10	47462828	47465161	TCONS_00016924	1000	-	47465161	47465161	0	2	619,1617,	0,716,
chr10	49031316	49034195	TCONS_00016956	1000	-	49034195	49034195	0	2	684,1911,	0,968,
chr10	52598607	52613891	TCONS_00023742	1000	+	52613891	52613891	0	3	467,485,3023,	0,7109,12261,
chr10	52598607	52601194	TCONS_00023741	1000	+	52601194	52601194	0	2	467,1979,	0,608,
chr10	52598839	52609128	TCONS_00015589	1000	+	52609128	52609128	0	2	235,3412,	0,6877,
chr10	58026445	58030509	TCONS_00018516	1000	-	58030509	58030509	0	3	989,90,701,	0,1965,3363,
chr10	58026492	58053915	TCONS_00023972	1000	-	58053915	58053915	0	6	942,90,65,150,225,86,	0,1918,3316,25935,26295,27337,
chr10	58026585	58053929	TCONS_00022529	1000	-	58053929	58053929	0	7	849,90,65,144,110,131,100,	0,1825,3223,25842,26202,26470,27244,
chr10	58026585	58033097	TCONS_00021489	1000	-	58033097	58033097	0	5	849,90,65,263,704,	0,1825,3223,5276,5808,
chr10	58031688	58033103	TCONS_00023524	1000	-	58033103	58033103	0	2	436,710,	0,705,
chr10	58052319	58053726	TCONS_00022530	1000	-	58053726	58053726	0	2	258,939,	0,468,
chr10	58052341	58053656	TCONS_00023525	1000	-	58053656	58053656	0	2	230,869,	0,446,
chr10	58066158	58070490	TCONS_00018517	1000	-	58070490	58070490	0	2	844,410,	0,3922,
chr10	61299281	61302659	TCONS_00022013	1000	-	61302659	61302659	0	2	1586,175,	0,3203,
chr10	61300465	61325257	TCONS_00021496	1000	-	61325257	61325257	0	3	402,138,225,	0,2019,24567,
chr10	67431867	67440138	TCONS_00022307	1000	+	67440138	67440138	0	2	1098,2944,	0,5327,
chr10	68742676	68750286	TCONS_00023556	1000	-	68750286	68750286	0	2	491,2546,	0,5064,
chr10	68745814	68802450	TCONS_00021526	1000	-	68802450	68802450	0	2	2017,1210,	0,55426,
chr10	68800998	68804164	TCONS_00019231	1000	-	68804164	68804164	0	2	683,591,	0,2575,
chr10	68801281	68805901	TCONS_00023999	1000	-	68805901	68805901	0	3	43,141,2328,	0,452,2292,
chr10	68943928	68946699	TCONS_00019870	1000	-	68946699	68946699	0	3	1812,136,557,	0,1931,2214,
chr10	68975920	68985884	TCONS_00019574	1000	+	68985884	68985884	0	4	7449,77,68,398,	0,8542,8925,9566,
chr10	68975920	68984593	TCONS_00019573	1000	+	68984593	68984593	0	2	6715,131,	0,8542,
chr10	68976072	68985837	TCONS_00022824	1000	+	68985837	68985837	0	4	6563,77,68,351,	0,8390,8773,9414,
chr10	68978831	68993310	TCONS_00021783	1000	+	68993310	68993310	0	4	3804,77,129,3507,	0,5631,6655,10972,
chr10	68978834	68989047	TCONS_00015851	1000	+	68989047	68989047	0	6	4446,72,68,130,286,235,	0,5633,6011,6652,9207,9978,
chr10	68978834	68988497	TCONS_00015850	1000	+	68988497	68988497	0	5	3801,77,68,129,456,	0,5628,6011,6652,9207,
chr10	68978834	68985855	TCONS_00015849	1000	+	68985855	68985855	0	4	4446,72,68,369,	0,5633,6011,6652,
chr10	68978834	68983801	TCONS_00015848	1000	+	68983801	68983801	0	2	2512,2044,	0,2923,
chr10	68978881	68989141	TCONS_00018918	1000	+	68989141	68989141	0	6	3754,77,68,129,286,329,	0,5581,5964,6605,9160,9931,
chr10	68978881	68989141	TCONS_00018919	1000	+	68989141	68989141	0	5	3754,77,129,286,329,	0,5581,6605,9160,9931,
chr10	68988824	68993310	TCONS_00021784	1000	+	68993310	68993310	0	2	197,3507,	0,979,
chr10	77412550	77416663	TCONS_00021802	1000	+	77416663	77416663	0	2	2697,194,	0,3919,
chr10	77416509	77420248	TCONS_00022835	1000	+	77420248	77420248	0	2	160,1440,	0,2299,
chr10	77418757	77439142	TCONS_00021287	1000	+	77439142	77439142	0	2	138,1216,	0,19169,
chr10	84664434	84667137	TCONS_00016023	1000	+	84667137	84667137	0	2	2071,515,	0,2188,
chr10	90487089	90500133	TCONS_00023126	1000	-	90500133	90500133	0	2	153,1044,	0,12000,
chr10	90487114	90499793	TCONS_00019951	1000	-	90499793	90499793	0	4	128,406,306,704,	0,2928,3883,11975,
chr10	90489787	90491412	TCONS_00019320	1000	-	90491412	90491412	0	2	661,415,	0,1210,
chr10	90489942	90500080	TCONS_00017617	1000	-	90500080	90500080	0	3	506,223,991,	0,1055,9147,
chr10	90489995	90500133	TCONS_00017616	1000	-	90500133	90500133	0	3	453,306,1044,	0,1002,9094,
chr10	92143771	92148226	TCONS_00019962	1000	-	92148226	92148226	0	2	1215,3122,	0,1333,
chr10	92145081	92148245	TCONS_00020216	1000	+	92148245	92148245	0	2	280,2695,	0,469,
chr10	93163148	93173425	TCONS_00023815	1000	+	93173425	93173425	0	2	3013,6989,	0,3288,
chr10	93163283	93166528	TCONS_00020218	1000	+	93166528	93166528	0	2	3009,44,	0,3201,
chr10	95124946	95127585	TCONS_00018680	1000	-	95127585	95127585	0	2	986,654,	0,1985,
chr10	95720071	95726633	TCONS_00016239	1000	+	95726633	95726633	0	2	320,4305,	0,2257,
chr10	97315899	97321467	TCONS_00016248	1000	+	97321467	97321467	0	2	261,238,	0,5330,
chr10	97447197	97460944	TCONS_00020231	1000	+	97460944	97460944	0	2	113,2193,	0,11554,
chr10	101546454	101550718	TCONS_00023828	1000	+	101550718	101550718	0	3	707,140,539,	0,2323,3725,
chr10	102387200	102422265	TCONS_00019658	1000	+	102422265	102422265	0	4	219,168,147,4160,	0,23061,23335,30905,
chr10	102387345	102429552	TCONS_00023830	1000	+	102429552	102429552	0	5	74,1438,147,2681,163,	0,21646,23190,30760,42044,
chr10	102408918	102422370	TCONS_00021341	1000	+	102422370	102422370	0	3	1511,147,4265,	0,1617,9187,
chr10	106212584	106255884	TCONS_00020011	1000	-	106255884	106255884	0	6	801,165,38,238,298,89,	0,14435,15007,21150,42795,43211,
chr10	106219692	106255559	TCONS_00021626	1000	-	106255559	106255559	0	6	913,165,38,238,114,180,	0,7327,7899,14042,16695,35687,
chr10	106219711	106255631	TCONS_00020561	1000	-	106255631	106255631	0	5	894,165,38,238,252,	0,7308,7880,14023,35668,
chr10	106219712	106228348	TCONS_00017825	1000	-	106228348	106228348	0	3	893,165,757,	0,7307,7879,
chr10	106219743	106255931	TCONS_00018712	1000	-	106255931	106255931	0	3	862,238,249,	0,13991,35939,
chr10	106219743	106255512	TCONS_00018711	1000	-	106255512	106255512	0	3	862,238,133,	0,13991,35636,
chr10	106219851	106255871	TCONS_00024094	1000	-	106255871	106255871	0	5	754,165,38,238,189,	0,7168,7740,13883,35831,
chr10	106225644	106228183	TCONS_00017826	1000	-	106228183	106228183	0	3	525,165,592,	0,1375,1947,
chr10	106225725	106255830	TCONS_00019380	1000	-	106255830	106255830	0	5	444,165,38,238,148,	0,1294,1866,8009,29957,
chr10	106225725	106255644	TCONS_00019379	1000	-	106255644	106255644	0	5	444,165,38,238,265,	0,1294,1866,8009,29654,
chr10	106225999	106236603	TCONS_00020012	1000	-	106236603	106236603	0	5	170,165,38,238,216,	0,1020,1592,7735,10388,
chr10	106226178	106255876	TCONS_00022159	1000	-	106255876	106255876	0	4	1006,38,238,194,	0,1413,7556,29504,
chr10	106226203	106228183	TCONS_00018713	1000	-	106228183	106228183	0	2	981,592,	0,1388,
chr10	106232381	106255631	TCONS_00023650	1000	-	106255631	106255631	0	3	29,238,252,	0,1353,22998,
chr10	106232774	106255960	TCONS_00017829	1000	-	106255960	106255960	0	2	1198,278,	0,22908,
chr10	106232774	106255550	TCONS_00017828	1000	-	106255550	106255550	0	2	1198,171,	0,22605,
chr10	106232774	106255525	TCONS_00017827	1000	-	106255525	106255525	0	3	1198,114,146,	0,3613,22605,
chr10	106938408	106939382	TCONS_00017848	1000	-	106939382	106939382	0	3	677,31,138,	0,741,836,
chr10	106938443	106939407	TCONS_00019386	1000	-	106939407	106939407	0	2	642,195,	0,769,
chr10	106938706	106939186	TCONS_00018722	1000	-	106939186	106939186	0	2	347,6,	0,474,
chr10	108703179	108706875	TCONS_00020574	1000	-	108706875	108706875	0	2	3058,112,	0,3584,
chr10	109131871	109133916	TCONS_00020024	1000	-	109133916	109133916	0	2	1304,27,	0,2018,
chr11	17816947	18035832	TCONS_00026231	1000	+	18035832	18035832	0	3	306,49,2071,	0,12941,216814,
chr11	17817020	18038057	TCONS_00026956	1000	+	18038057	18038057	0	4	233,49,1016,49,	0,12868,216741,220988,
chr11	17817036	18034737	TCONS_00025372	1000	+	18034737	18034737	0	4	217,86,49,976,	0,1643,12852,216725,
chr11	17817053	17832418	TCONS_00025611	1000	+	17832418	17832418	0	3	200,49,452,	0,12835,14913,
chr11	17817057	17833552	TCONS_00024138	1000	+	17833552	17833552	0	4	196,86,49,1586,	0,1622,12831,14909,
chr11	17817062	18035723	TCONS_00024139	1000	+	18035723	18035723	0	4	191,49,77,1962,	0,12826,146356,216699,
chr11	17817062	18035723	TCONS_00024140	1000	+	18035723	18035723	0	5	191,49,77,65,1962,	0,12826,146356,177273,216699,
chr11	12758384	13101409	TCONS_00026952	1000	+	13101409	13101409	0	3	441,138,6149,	0,130348,336876,
chr11	12758417	12891801	TCONS_00024124	1000	+	12891801	12891801	0	2	408,3069,	0,130315,
chr11	12758539	12896982	TCONS_00026227	1000	+	12896982	12896982	0	3	286,138,990,	0,130193,137453,
chr11	20313936	20328596	TCONS_00025234	1000	-	20328596	20328596	0	4	82,74,36,344,	0,11581,12603,14316,
chr11	20313968	20329335	TCONS_00027046	1000	-	20329335	20329335	0	5	50,74,36,357,175,	0,11549,12571,14284,15192,
chr11	63817306	63841207	TCONS_00024798	1000	-	63841207	63841207	0	2	9795,10209,	0,13692,
chr11	66400881	66707164	TCONS_00024820	1000	-	66707164	66707164	0	2	16463,621,	0,305662,
chr11	72568222	72637823	TCONS_00025672	1000	+	72637823	72637823	0	2	6869,7014,	0,62587,
chr11	84264966	84296330	TCONS_00025335	1000	-	84296330	84296330	0	2	1551,472,	0,30892,
chr11	84264966	84295822	TCONS_00024975	1000	-	84295822	84295822	0	2	1551,901,	0,29955,
chr11	15497222	15505325	TCONS_00025492	1000	-	15505325	15505325	0	2	1024,802,	0,7301,
chr11	16760065	16766605	TCONS_00024134	1000	+	16766605	16766605	0	2	3587,1839,	0,4701,
chr11	18002501	18035783	TCONS_00026957	1000	+	18035783	18035783	0	2	28,2022,	0,31260,
chr11	20324768	20360880	TCONS_00025723	1000	-	20360880	20360880	0	5	823,36,357,175,41,	0,1771,3484,4392,36071,
chr11	20325286	20360879	TCONS_00027047	1000	-	20360879	20360879	0	5	305,36,357,91,40,	0,1253,2966,3874,35553,
chr11	35894820	35901815	TCONS_00024676	1000	-	35901815	35901815	0	2	1815,144,	0,6851,
chr11	35906363	35908452	TCONS_00024677	1000	-	35908452	35908452	0	2	961,770,	0,1319,
chr11	37920210	37926064	TCONS_00025514	1000	-	37926064	37926064	0	2	1573,1338,	0,4516,
chr11	37924614	37927231	TCONS_00025736	1000	-	37927231	37927231	0	2	1401,993,	0,1624,
chr11	37928904	37932677	TCONS_00025515	1000	-	37932677	37932677	0	2	1338,554,	0,3219,
chr11	37932567	37935810	TCONS_00024689	1000	-	37935810	37935810	0	2	213,1928,	0,1315,
chr11	41573046	41577651	TCONS_00026820	1000	+	41577651	41577651	0	4	251,47,202,1752,	0,712,1526,2853,
chr11	41574071	41575912	TCONS_00026968	1000	+	41575912	41575912	0	2	703,13,	0,1828,
chr11	46069618	46074744	TCONS_00026970	1000	+	46074744	46074744	0	2	33,445,	0,4681,
chr11	60882556	60883994	TCONS_00025652	1000	+	60883994	60883994	0	2	173,1158,	0,280,
chr11	66683671	66706962	TCONS_00024821	1000	-	66706962	66706962	0	2	311,419,	0,22872,
chr11	71780160	71784978	TCONS_00025450	1000	+	71784978	71784978	0	3	672,112,590,	0,3434,4228,
chr11	72570051	72574380	TCONS_00026087	1000	+	72574380	72574380	0	2	1520,1316,	0,3013,
chr11	76753215	76763858	TCONS_00026692	1000	+	76763858	76763858	0	3	690,95,53,	0,7619,10590,
chr11	78763915	78765928	TCONS_00027017	1000	+	78765928	78765928	0	2	1221,204,	0,1809,
chr11	80007134	80021258	TCONS_00025465	1000	+	80021258	80021258	0	4	98,230,329,276,	0,8797,12853,13848,
chr11	80015847	80021037	TCONS_00026492	1000	+	80021037	80021037	0	2	314,1050,	0,4140,
chr11	87384752	87394772	TCONS_00026625	1000	-	87394772	87394772	0	2	605,8287,	0,1733,
chr12	20692090	20732072	TCONS_00030149	1000	-	20732072	20732072	0	3	419,170,5638,	0,2630,34344,
chr12	446923	465460	TCONS_00028460	1000	+	465460	465460	0	2	229,22,	0,18515,
chr12	14140423	14145519	TCONS_00030346	1000	-	14145519	14145519	0	3	43,585,57,	0,2043,5039,
chr12	14874241	14881076	TCONS_00028977	1000	-	14881076	14881076	0	2	1572,317,	0,6518,
chr12	14874245	14881224	TCONS_00027974	1000	-	14881224	14881224	0	2	1568,576,	0,6403,
chr12	15250893	15253009	TCONS_00030451	1000	+	15253009	15253009	0	3	129,141,19,	0,1172,2097,
chr12	20688371	20692493	TCONS_00029265	1000	-	20692493	20692493	0	3	1000,53,141,	0,3323,3981,
chr12	21575553	21598653	TCONS_00030942	1000	-	21598653	21598653	0	8	22,221,100,92,438,132,111,85,	0,532,945,1784,4842,10305,10833,23015,
chr12	21575761	21598653	TCONS_00028702	1000	-	21598653	21598653	0	5	837,92,132,111,85,	0,1576,10097,10625,22807,
chr12	21579726	21598650	TCONS_00029925	1000	-	21598650	21598650	0	4	1107,132,111,82,	0,6132,6660,18842,
chr12	21581789	21598641	TCONS_00030743	1000	-	21598641	21598641	0	4	263,132,111,73,	0,4069,4597,16779,
chr12	21585712	21598782	TCONS_00029518	1000	-	21598782	21598782	0	3	278,111,214,	0,674,12856,
chr12	21585713	21587132	TCONS_00029735	1000	-	21587132	21587132	0	2	277,746,	0,673,
chr12	23909845	23911999	TCONS_00027485	1000	+	23911999	23911999	0	2	56,243,	0,1911,
chr12	23909849	23912239	TCONS_00028868	1000	+	23912239	23912239	0	2	34,501,	0,1889,
chr12	24296759	24309202	TCONS_00030751	1000	-	24309202	24309202	0	3	621,119,408,	0,3970,12035,
chr12	24296761	24309304	TCONS_00030372	1000	-	24309304	24309304	0	4	619,119,41,93,	0,3968,9490,12450,
chr12	24296764	24309317	TCONS_00028120	1000	-	24309317	24309317	0	3	616,119,106,	0,3965,12447,
chr12	24447469	24449348	TCONS_00028123	1000	-	24449348	24449348	0	2	1345,447,	0,1432,
chr12	24693015	24697775	TCONS_00028127	1000	-	24697775	24697775	0	5	334,78,130,92,346,	0,1266,3110,3340,4414,
chr12	24693126	24697395	TCONS_00028126	1000	-	24697395	24697395	0	5	223,78,130,92,85,	0,1155,2999,3229,4184,
chr12	24693247	24697471	TCONS_00029280	1000	-	24697471	24697471	0	5	102,78,130,92,27,	0,1034,2878,3108,4197,
chr12	24693370	24697422	TCONS_00029739	1000	-	24697422	24697422	0	5	48,78,130,92,112,	0,911,2755,2985,3940,
chr12	39644060	39683907	TCONS_00027628	1000	+	39683907	39683907	0	2	337,5854,	0,33993,
chr12	39644086	39688949	TCONS_00030698	1000	+	39688949	39688949	0	3	311,101,1577,	0,33967,43286,
chr12	39644490	39683907	TCONS_00029857	1000	+	39683907	39683907	0	2	72,5854,	0,33563,
chr12	39776505	39782484	TCONS_00029171	1000	+	39782484	39782484	0	2	2671,2572,	0,3407,
chr12	40180894	40182045	TCONS_00027639	1000	+	40182045	40182045	0	2	465,328,	0,823,
chr12	40181219	40182095	TCONS_00028561	1000	+	40182095	40182095	0	2	142,378,	0,498,
chr12	40909685	40913131	TCONS_00029325	1000	-	40913131	40913131	0	2	2942,27,	0,3419,
chr12	40911428	40913405	TCONS_00028763	1000	-	40913405	40913405	0	2	1206,301,	0,1676,
chr12	41283647	41284415	TCONS_00029570	1000	-	41284415	41284415	0	2	408,220,	0,548,
chr12	45586708	45595597	TCONS_00027733	1000	+	45595597	45595597	0	2	89,1484,	0,7405,
chr12	45586717	45592499	TCONS_00027732	1000	+	45592499	45592499	0	2	80,1015,	0,4767,
chr12	46072234	46074937	TCONS_00030796	1000	-	46074937	46074937	0	2	1082,924,	0,1779,
chr12	48718269	48724136	TCONS_00027755	1000	+	48724136	48724136	0	2	171,984,	0,4883,
chr12	48718274	48724110	TCONS_00030517	1000	+	48724110	48724110	0	2	299,958,	0,4878,
chr12	48718320	48723981	TCONS_00028930	1000	+	48723981	48723981	0	3	109,74,677,	0,4832,4984,
chr12	48718357	48724032	TCONS_00028598	1000	+	48724032	48724032	0	2	72,880,	0,4795,
chr12	48718383	48723859	TCONS_00029681	1000	+	48723859	48723859	0	3	57,74,555,	0,4769,4921,
chr12	49343446	49345238	TCONS_00028797	1000	-	49345238	49345238	0	2	1508,141,	0,1651,
chr12	52835292	52836298	TCONS_00029093	1000	-	52836298	52836298	0	2	543,187,	0,819,
chr13	92002520	92295617	TCONS_00034206	1000	-	92295617	92295617	0	5	36,98,153,144,95,	0,4718,11712,36111,293002,
chr13	31453461	31479859	TCONS_00032375	1000	-	31479859	31479859	0	2	683,7106,	0,19292,
chr13	45900561	46158684	TCONS_00033474	1000	-	46158684	46158684	0	8	49,1053,76,70,109,165,238,930,	0,144,40149,62429,92258,92865,252826,257193,
chr13	45920098	46153734	TCONS_00033925	1000	-	46153734	46153734	0	6	636,76,70,109,165,347,	0,20612,42892,72721,73328,233289,
chr13	112190859	112201037	TCONS_00031555	1000	+	112201037	112201037	0	2	263,1066,	0,9112,
chr13	48625749	48705508	TCONS_00034762	1000	-	48705508	48705508	0	3	29,49,434,	0,40214,79325,
chr13	91877019	91973808	TCONS_00032001	1000	-	91973808	91973808	0	9	606,134,153,114,124,438,50,121,147,	0,39092,55287,56235,77477,82357,84123,96360,96642,
chr13	91877560	91933370	TCONS_00034817	1000	-	91933370	91933370	0	4	65,134,153,116,	0,38551,54746,55694,
chr13	91877565	91976300	TCONS_00033747	1000	-	91976300	91976300	0	10	60,134,153,114,124,438,50,121,145,68,	0,38546,54741,55689,76931,81811,83577,95814,96096,98667,
chr13	91877565	91976300	TCONS_00033748	1000	-	91976300	91976300	0	10	60,134,153,114,124,438,50,103,145,68,	0,38546,54741,55689,76931,81811,83577,95832,96096,98667,
chr13	92002514	92038769	TCONS_00034417	1000	-	92038769	92038769	0	5	42,98,185,153,138,	0,4724,10189,11718,36117,
chr13	92002514	92038769	TCONS_00034418	1000	-	92038769	92038769	0	4	42,98,153,138,	0,4724,11718,36117,
chr13	92002520	92016623	TCONS_00034205	1000	-	92016623	92016623	0	5	36,98,185,153,92,	0,4718,10183,11712,14011,
chr13	92002840	92038764	TCONS_00032770	1000	-	92038764	92038764	0	4	93,98,153,133,	0,4398,11392,35791,
chr13	92007256	92016634	TCONS_00034628	1000	-	92016634	92016634	0	3	80,153,103,	0,6976,9275,
chr13	92007257	92039093	TCONS_00032004	1000	-	92039093	92039093	0	3	79,153,462,	0,6975,31374,
chr13	92007259	92032379	TCONS_00032003	1000	-	92032379	92032379	0	3	77,153,67,	0,6973,25053,
chr13	92007269	92244242	TCONS_00034820	1000	-	92244242	92244242	0	4	67,153,144,37,	0,6963,31362,236936,
chr13	98214606	98325012	TCONS_00033758	1000	-	98325012	98325012	0	7	71,120,158,179,163,144,93,	0,32224,32655,34227,105631,108854,110313,
chr13	45419867	45426187	TCONS_00034350	1000	-	45426187	45426187	0	2	2400,2319,	0,4001,
chr13	45888288	45957344	TCONS_00031646	1000	-	45957344	45957344	0	5	12322,1053,52,106,16634,	0,12417,31261,32327,52422,
chr13	45895432	45903206	TCONS_00033924	1000	-	45903206	45903206	0	2	5178,1771,	0,6003,
chr13	45916618	45956509	TCONS_00034131	1000	-	45956509	45956509	0	2	4103,15799,	0,24092,
chr13	45916619	45963756	TCONS_00032974	1000	-	45963756	45963756	0	3	4115,76,766,	0,24091,46371,
chr13	45916619	45941687	TCONS_00032973	1000	-	45941687	45941687	0	3	2982,119,977,	0,3996,24091,
chr13	46153215	46158698	TCONS_00033926	1000	-	46158698	46158698	0	2	410,944,	0,4539,
chr13	54618386	54636183	TCONS_00033258	1000	-	54636183	54636183	0	5	3671,623,82,86,836,	0,4209,15738,15952,16961,
chr13	54618386	54636183	TCONS_00034370	1000	-	54636183	54636183	0	6	3671,623,82,86,69,594,	0,4209,15738,15952,16961,17203,
chr13	54619663	54623198	TCONS_00034147	1000	-	54623198	54623198	0	3	2394,129,39,	0,2932,3496,
chr13	54620176	54635646	TCONS_00034773	1000	-	54635646	54635646	0	6	28,1517,623,82,86,299,	0,364,2419,13948,14162,15171,
chr13	54620176	54635646	TCONS_00034774	1000	-	54635646	54635646	0	5	28,1517,623,82,299,	0,364,2419,13948,15171,
chr13	54620573	54634756	TCONS_00034580	1000	-	54634756	54634756	0	4	1484,623,82,418,	0,2022,13551,13765,
chr13	54620573	54633064	TCONS_00034578	1000	-	54633064	54633064	0	3	1484,623,210,	0,2022,12281,
chr13	54620573	54633064	TCONS_00034579	1000	-	54633064	54633064	0	3	1484,119,210,	0,2022,12281,
chr13	54622445	54634508	TCONS_00033933	1000	-	54634508	54634508	0	3	773,82,170,	0,11679,11893,
chr13	54632736	54636183	TCONS_00034371	1000	-	54636183	54636183	0	4	233,82,86,836,	0,1388,1602,2611,
chr13	55306320	55307684	TCONS_00033380	1000	+	55307684	55307684	0	2	580,39,	0,1325,
chr13	57560779	57566960	TCONS_00032861	1000	+	57566960	57566960	0	3	1205,1369,1245,	0,2609,4936,
chr13	57561471	57568167	TCONS_00032263	1000	+	57568167	57568167	0	3	513,192,2452,	0,1917,4244,
chr13	57561471	57568167	TCONS_00032264	1000	+	57568167	57568167	0	3	513,185,2452,	0,1917,4244,
chr13	57561677	57565169	TCONS_00031165	1000	+	57565169	57565169	0	2	307,1781,	0,1711,
chr13	57563344	57566960	TCONS_00032862	1000	+	57566960	57566960	0	2	1413,1245,	0,2371,
chr13	59918329	59963560	TCONS_00033387	1000	+	59963560	59963560	0	3	217,120,11524,	0,32637,33707,
chr13	59918339	59991680	TCONS_00031185	1000	+	59991680	59991680	0	2	207,40714,	0,32627,
chr13	59918340	59961268	TCONS_00033151	1000	+	59961268	59961268	0	3	206,1936,8239,	0,32626,34689,
chr13	83747586	83750819	TCONS_00031306	1000	+	83750819	83750819	0	3	16,255,2174,	0,608,1059,
chr13	83747587	83750891	TCONS_00034504	1000	+	83750891	83750891	0	4	15,1548,50,505,	0,607,2342,2799,
chr13	83747637	83752117	TCONS_00034305	1000	+	83752117	83752117	0	3	2105,50,1731,	0,2292,2749,
chr13	88110543	88137268	TCONS_00034809	1000	-	88137268	88137268	0	2	26,220,	0,26505,
chr13	88136483	88137584	TCONS_00031966	1000	-	88137584	88137584	0	2	295,536,	0,565,
chr13	88337606	88339957	TCONS_00033038	1000	-	88339957	88339957	0	2	250,1782,	0,569,
chr13	88338481	88339951	TCONS_00033542	1000	-	88339951	88339951	0	2	256,1071,	0,399,
chr13	89044902	89047250	TCONS_00032470	1000	-	89047250	89047250	0	2	210,73,	0,2275,
chr13	89084336	89094381	TCONS_00031373	1000	+	89094381	89094381	0	2	3942,5996,	0,4049,
chr13	89084336	89094381	TCONS_00034082	1000	+	89094381	89094381	0	2	3942,5999,	0,4046,
chr13	89408298	89410507	TCONS_00034083	1000	+	89410507	89410507	0	2	1534,440,	0,1769,
chr13	89930281	89941673	TCONS_00034624	1000	-	89941673	89941673	0	4	565,112,212,288,	0,1468,9608,11104,
chr13	91904700	91973808	TCONS_00032002	1000	-	91973808	91973808	0	9	143,134,153,114,124,438,50,121,147,	0,11411,27606,28554,49796,54676,56442,68679,68961,
chr13	91904779	91959813	TCONS_00032768	1000	-	91959813	91959813	0	6	64,137,153,114,124,437,	0,11332,27527,28475,49717,54597,
chr13	91904800	91976309	TCONS_00033316	1000	-	91976309	91976309	0	10	43,134,153,114,124,438,50,121,145,77,	0,11311,27506,28454,49696,54576,56342,68579,68861,71432,
chr13	91916107	91974024	TCONS_00033044	1000	-	91974024	91974024	0	8	138,153,114,124,438,50,121,363,	0,16199,17147,38389,43269,45035,57272,57554,
chr13	91916131	91976319	TCONS_00034201	1000	-	91976319	91976319	0	8	117,153,114,438,50,121,145,87,	0,16175,17123,43245,45011,57248,57530,60101,
chr13	91916131	91976319	TCONS_00034202	1000	-	91976319	91976319	0	8	114,153,114,438,50,103,145,87,	0,16175,17123,43245,45011,57266,57530,60101,
chr13	91916131	91961188	TCONS_00034626	1000	-	91961188	91961188	0	7	114,153,114,124,71,438,46,	0,16175,17123,38365,41901,43245,45011,
chr13	91916202	91976317	TCONS_00034414	1000	-	91976317	91976317	0	9	46,153,114,124,438,50,121,145,85,	0,16104,17052,38294,43174,44940,57177,57459,60030,
chr13	91916202	91976317	TCONS_00034415	1000	-	91976317	91976317	0	8	43,153,114,438,50,121,145,85,	0,16104,17052,43174,44940,57177,57459,60030,
chr13	91932395	91959997	TCONS_00033551	1000	-	91959997	91959997	0	4	64,114,124,621,	0,859,22101,26981,
chr13	91937220	91976319	TCONS_00034203	1000	-	91976319	91976319	0	7	94,124,438,50,121,145,87,	0,17276,22156,23922,36159,36441,39012,
chr13	91952951	91974184	TCONS_00034204	1000	-	91974184	91974184	0	5	117,438,50,121,523,	0,6425,8191,20428,20710,
chr13	91953021	91974024	TCONS_00033045	1000	-	91974024	91974024	0	6	47,124,438,50,121,363,	0,1475,6355,8121,20358,20640,
chr13	91954298	91974017	TCONS_00034818	1000	-	91974017	91974017	0	5	322,438,50,103,356,	0,5078,6844,19099,19363,
chr13	91959269	91974017	TCONS_00034819	1000	-	91974017	91974017	0	4	545,50,121,356,	0,1873,14110,14392,
chr13	91959353	91976309	TCONS_00033317	1000	-	91976309	91976309	0	5	461,50,103,145,77,	0,1789,14044,14308,16879,
chr13	91959358	91976317	TCONS_00034416	1000	-	91976317	91976317	0	5	456,50,121,145,85,	0,1784,14021,14303,16874,
chr13	93166002	93173563	TCONS_00033859	1000	+	93173563	93173563	0	3	193,365,600,	0,5850,6961,
chr13	112131831	112133278	TCONS_00033774	1000	-	112133278	112133278	0	2	296,106,	0,1341,
chr13	114474318	114496918	TCONS_00034338	1000	+	114496918	114496918	0	3	82,117,755,	0,8034,21845,
chr13	114481770	114497327	TCONS_00033901	1000	+	114497327	114497327	0	2	699,1015,	0,14542,
chr13	118271082	118293393	TCONS_00032953	1000	+	118293393	118293393	0	3	110,214,10707,	0,6203,11604,
chr13	118271098	118296226	TCONS_00034550	1000	+	118296226	118296226	0	3	94,5558,435,	0,6187,24693,
chr13	118271098	118293395	TCONS_00031587	1000	+	118293395	118293395	0	2	94,16110,	0,6187,
chr13	118271146	118293354	TCONS_00033684	1000	+	118293354	118293354	0	2	46,10668,	0,11540,
chr13	118271332	118290406	TCONS_00032954	1000	+	118290406	118290406	0	2	201,13121,	0,5953,
chr13	118276709	118296183	TCONS_00033225	1000	+	118296183	118296183	0	2	6134,392,	0,19082,
chr13	118278402	118296574	TCONS_00034340	1000	+	118296574	118296574	0	3	4441,51,88,	0,17389,18084,
chr14	105817890	105936363	TCONS_00036015	1000	-	105936363	105936363	0	5	1292,63,147,163,140,	0,86301,114328,115195,118333,
chr14	105819146	105938663	TCONS_00037023	1000	-	105938663	105938663	0	6	36,63,147,163,130,79,	0,85045,113072,113939,117077,119438,
chr14	105889171	105936353	TCONS_00036017	1000	-	105936353	105936353	0	5	475,63,147,163,130,	0,15020,43047,43914,47052,
chr14	42037286	42198532	TCONS_00038707	1000	-	42198532	42198532	0	3	72,505,143,	0,131788,161103,
chr14	72502829	72654817	TCONS_00038636	1000	+	72654817	72654817	0	4	753,393,299,86,	0,17537,32737,151902,
chr14	76776416	76841074	TCONS_00038122	1000	-	76841074	76841074	0	7	25,58,101,89,107,202,2687,	0,6115,6430,7789,11030,13554,61971,
chr14	76780656	76841031	TCONS_00037452	1000	-	76841031	76841031	0	7	125,58,101,89,107,202,853,	0,1875,2190,3549,6790,9314,59522,
chr14	76780728	76841074	TCONS_00038123	1000	-	76841074	76841074	0	8	53,58,101,89,112,119,202,2687,	0,1803,2118,3477,6713,8079,9242,57659,
chr14	76784090	76837489	TCONS_00036332	1000	-	76837489	76837489	0	5	204,107,119,202,344,	0,3356,4717,5880,53055,
chr14	76784233	76841031	TCONS_00037453	1000	-	76841031	76841031	0	4	61,112,202,3886,	0,3208,5737,52912,
chr14	109499979	110010854	TCONS_00037718	1000	-	110010854	110010854	0	6	370,152,115,53,145,2804,	0,103393,134832,281330,307831,508071,
chr14	109500084	110008310	TCONS_00038396	1000	-	110008310	110008310	0	6	265,129,152,53,145,260,	0,94882,103288,281225,307726,507966,
chr14	109500084	110008310	TCONS_00038397	1000	-	110008310	110008310	0	7	265,152,115,53,145,458,260,	0,103288,134727,281225,307726,325384,507966,
chr14	109500097	110010889	TCONS_00037278	1000	-	110010889	110010889	0	5	252,152,53,145,2839,	0,103275,281212,307713,507953,
chr14	109500105	109812740	TCONS_00037031	1000	-	109812740	109812740	0	5	244,152,53,145,149,	0,103267,281204,307705,312486,
chr14	109500219	109825944	TCONS_00038586	1000	-	109825944	109825944	0	5	130,152,53,145,476,	0,103153,281090,307591,325249,
chr14	109500264	109866731	TCONS_00036707	1000	-	109866731	109866731	0	6	85,152,53,145,458,31,	0,103108,281045,307546,325204,366436,
chr14	109557068	110010829	TCONS_00038161	1000	-	110010829	110010829	0	5	208,152,53,145,2779,	0,46304,224241,250742,450982,
chr14	109594515	110010854	TCONS_00037719	1000	-	110010854	110010854	0	6	298,129,152,53,145,2804,	0,451,8857,186794,213295,413535,
chr14	109594699	110010807	TCONS_00037279	1000	-	110010807	110010807	0	7	396,152,115,53,145,458,2757,	0,8673,40112,186610,213111,230769,413351,
chr14	109594829	110010787	TCONS_00036708	1000	-	110010787	110010787	0	6	266,152,115,53,145,2737,	0,8543,39982,186480,212981,413221,
chr14	109594982	110009019	TCONS_00037032	1000	-	110009019	110009019	0	7	113,90,152,115,53,145,969,	0,2907,8390,39829,186327,212828,413068,
chr14	109594985	110008360	TCONS_00036400	1000	-	110008360	110008360	0	6	110,152,53,145,91,310,	0,8387,186324,212825,315191,413065,
chr14	109597946	109812707	TCONS_00038162	1000	-	109812707	109812707	0	6	33,152,115,53,145,116,	0,5426,36865,183363,209864,214645,
chr14	109603182	110010889	TCONS_00038398	1000	-	110010889	110010889	0	4	342,53,145,2839,	0,178127,204628,404868,
chr14	109634605	110008288	TCONS_00036710	1000	-	110008288	110008288	0	5	321,53,145,458,238,	0,146704,173205,190863,373445,
chr14	109780798	109865518	TCONS_00038163	1000	-	109865518	109865518	0	4	564,145,458,50,	0,27012,44670,84670,
chr14	109780905	109867282	TCONS_00036402	1000	-	109867282	109867282	0	5	457,145,149,458,582,	0,26905,31686,44563,85795,
chr14	109823127	109910217	TCONS_00037033	1000	-	109910217	109910217	0	3	132,458,41,	0,2341,87049,
chr14	109825346	110009049	TCONS_00037952	1000	-	110009049	110009049	0	2	580,999,	0,182704,
chr14	1336759	1346898	TCONS_00038166	1000	+	1346898	1346898	0	2	115,1245,	0,8894,
chr14	1336759	1341872	TCONS_00038165	1000	+	1341872	1341872	0	2	115,1078,	0,4035,
chr14	3232118	3237066	TCONS_00036230	1000	-	3237066	3237066	0	2	2372,2444,	0,2504,
chr14	3393777	3400867	TCONS_00036724	1000	+	3400867	3400867	0	4	256,178,115,824,	0,4919,5561,6266,
chr14	3393777	3400383	TCONS_00036415	1000	+	3400383	3400383	0	3	256,115,279,	0,5561,6327,
chr14	3393780	3401839	TCONS_00037517	1000	+	3401839	3401839	0	3	253,498,1923,	0,5558,6136,
chr14	3393796	3401219	TCONS_00034894	1000	+	3401219	3401219	0	2	237,1881,	0,5542,
chr14	3394525	3401839	TCONS_00037518	1000	+	3401839	3401839	0	2	87,2501,	0,4813,
chr14	3394545	3400764	TCONS_00038175	1000	+	3400764	3400764	0	2	190,1426,	0,4793,
chr14	3394574	3400764	TCONS_00038176	1000	+	3400764	3400764	0	3	38,178,1426,	0,4122,4764,
chr14	3394633	3400527	TCONS_00034895	1000	+	3400527	3400527	0	3	102,178,1189,	0,4063,4705,
chr14	6768852	6786819	TCONS_00037048	1000	+	6786819	6786819	0	4	159,63,1111,3785,	0,10416,10748,14182,
chr14	6768873	6785697	TCONS_00034914	1000	+	6785697	6785697	0	4	138,63,340,2663,	0,10395,10727,14161,
chr14	6768902	6781022	TCONS_00034913	1000	+	6781022	6781022	0	3	109,63,1422,	0,10366,10698,
chr14	6768910	6785697	TCONS_00034915	1000	+	6785697	6785697	0	5	101,136,63,1111,2663,	0,9408,10358,10690,14124,
chr14	6768915	6783350	TCONS_00037730	1000	+	6783350	6783350	0	3	96,1111,316,	0,10685,14119,
chr14	6768940	6780746	TCONS_00037963	1000	+	6780746	6780746	0	2	71,1146,	0,10660,
chr14	6779051	6781414	TCONS_00037049	1000	+	6781414	6781414	0	2	280,1814,	0,549,
chr14	6779339	6786819	TCONS_00036069	1000	+	6786819	6786819	0	2	1372,3785,	0,3695,
chr14	10712472	10717278	TCONS_00037856	1000	-	10717278	10717278	0	2	1438,59,	0,4747,
chr14	10789684	10798146	TCONS_00036081	1000	+	10798146	10798146	0	2	3219,2323,	0,6139,
chr14	10793500	10797694	TCONS_00036082	1000	+	10797694	10797694	0	2	2400,720,	0,3474,
chr14	11110329	11113702	TCONS_00034955	1000	+	11113702	11113702	0	2	529,2649,	0,724,
chr14	18626353	18628836	TCONS_00036272	1000	-	18628836	18628836	0	2	1119,45,	0,2438,
chr14	36490437	36492232	TCONS_00035688	1000	-	36492232	36492232	0	3	986,66,107,	0,1404,1688,
chr14	42075921	42198539	TCONS_00036604	1000	-	42198539	42198539	0	3	66,505,150,	0,93153,122468,
chr14	42124498	42198538	TCONS_00038107	1000	-	42198538	42198538	0	3	83,505,149,	0,44576,73891,
chr14	42152258	42198526	TCONS_00037888	1000	-	42198526	42198526	0	3	60,505,137,	0,16816,46131,
chr14	42157925	42198533	TCONS_00037660	1000	-	42198533	42198533	0	3	51,505,144,	0,11149,40464,
chr14	42164496	42198526	TCONS_00036298	1000	-	42198526	42198526	0	3	741,505,137,	0,4578,33893,
chr14	42165764	42198530	TCONS_00038324	1000	-	42198530	42198530	0	3	518,505,141,	0,3310,32625,
chr14	42168930	42198513	TCONS_00037216	1000	-	42198513	42198513	0	2	649,124,	0,29459,
chr14	43114192	43116032	TCONS_00038213	1000	+	43116032	43116032	0	2	1674,77,	0,1763,
chr14	44862558	44864721	TCONS_00036789	1000	+	44864721	44864721	0	3	55,338,359,	0,523,1804,
chr14	61231277	61238232	TCONS_00035773	1000	-	61238232	61238232	0	2	3354,99,	0,6856,
chr14	61521413	61539268	TCONS_00038218	1000	+	61539268	61539268	0	2	65,7472,	0,10383,
chr14	63196157	63197660	TCONS_00036797	1000	+	63197660	63197660	0	2	48,851,	0,652,
chr14	66594348	66618642	TCONS_00038631	1000	+	66618642	66618642	0	2	183,1741,	0,22553,
chr14	72486364	72535861	TCONS_00037571	1000	+	72535861	72535861	0	8	60,344,87,108,259,756,393,295,	0,4177,10271,15331,15724,16462,34002,49202,
chr14	72486364	72535861	TCONS_00037572	1000	+	72535861	72535861	0	7	60,344,87,112,756,393,295,	0,4177,10271,15331,16462,34002,49202,
chr14	72494548	72535861	TCONS_00038009	1000	+	72535861	72535861	0	7	425,87,116,166,756,393,295,	0,2087,7147,7633,8278,25818,41018,
chr14	72496563	72535848	TCONS_00035192	1000	+	72535848	72535848	0	6	159,108,259,756,393,282,	0,5132,5525,6263,23803,39003,
chr14	72496630	72535861	TCONS_00038010	1000	+	72535861	72535861	0	6	92,112,166,756,393,295,	0,5065,5551,6196,23736,38936,
chr14	72496630	72535861	TCONS_00038011	1000	+	72535861	72535861	0	6	92,120,166,756,393,295,	0,5065,5551,6196,23736,38936,
chr14	72501529	72535859	TCONS_00036481	1000	+	72535859	72535859	0	3	274,393,293,	0,18837,34037,
chr14	72501672	72535848	TCONS_00035193	1000	+	72535848	72535848	0	3	139,393,282,	0,18694,33894,
chr14	72502029	72535859	TCONS_00036482	1000	+	72535859	72535859	0	4	318,756,393,293,	0,797,18337,33537,
chr14	72502143	72521029	TCONS_00038228	1000	+	72521029	72521029	0	3	309,756,663,	0,683,18223,
chr14	72502335	72535848	TCONS_00035194	1000	+	72535848	72535848	0	4	117,756,393,282,	0,491,18031,33231,
chr14	72502604	72520797	TCONS_00037101	1000	+	72520797	72520797	0	2	978,431,	0,17762,
chr14	72502679	72535859	TCONS_00036162	1000	+	72535859	72535859	0	3	903,393,293,	0,17687,32887,
chr14	72503269	72565162	TCONS_00037345	1000	+	72565162	72565162	0	4	313,393,299,108,	0,17097,32297,61785,
chr14	72520312	72535861	TCONS_00038012	1000	+	72535861	72535861	0	2	447,295,	0,15254,
chr14	76837851	76841083	TCONS_00036642	1000	-	76841083	76841083	0	2	771,905,	0,2327,
chr14	80433982	80436650	TCONS_00036345	1000	-	80436650	80436650	0	3	233,82,234,	0,995,2434,
chr14	80433986	80436612	TCONS_00036977	1000	-	80436612	80436612	0	2	229,1635,	0,991,
chr14	82152304	82154909	TCONS_00038365	1000	-	82154909	82154909	0	2	444,371,	0,2234,
chr14	86316098	86317685	TCONS_00038568	1000	-	86317685	86317685	0	2	1507,30,	0,1557,
chr14	99886086	99900308	TCONS_00037709	1000	-	99900308	99900308	0	4	125,69,239,862,	0,281,10796,13360,
chr14	99886086	99900308	TCONS_00037710	1000	-	99900308	99900308	0	3	125,69,862,	0,281,13360,
chr14	99886103	99921898	TCONS_00035982	1000	-	99921898	99921898	0	3	333,168,1599,	0,13343,34196,
chr14	99886189	99938947	TCONS_00037939	1000	-	99938947	99938947	0	5	22,69,168,1223,24,	0,178,13257,34110,52734,
chr14	99896494	99960818	TCONS_00038151	1000	-	99960818	99960818	0	4	627,168,1124,778,	0,2952,23904,63546,
chr14	99898820	99922135	TCONS_00035983	1000	-	99922135	99922135	0	2	794,1836,	0,21479,
chr14	99899383	99960228	TCONS_00036690	1000	-	99960228	99960228	0	3	231,1223,188,	0,20916,60657,
chr14	99912299	99960539	TCONS_00038748	1000	-	99960539	99960539	0	4	161,1137,89,499,	0,8086,44473,47741,
chr14	99912426	99960334	TCONS_00037268	1000	-	99960334	99960334	0	3	34,1223,294,	0,7873,47614,
chr14	99920096	99922964	TCONS_00038574	1000	-	99922964	99922964	0	2	1426,67,	0,2801,
chr14	99920102	99938974	TCONS_00037711	1000	-	99938974	99938974	0	2	1420,51,	0,18821,
chr14	99920103	99960818	TCONS_00036691	1000	-	99960818	99960818	0	2	1419,778,	0,39937,
chr14	99920112	99960334	TCONS_00037269	1000	-	99960334	99960334	0	3	1410,93,294,	0,18811,39928,
chr14	100027709	100029398	TCONS_00037012	1000	-	100029398	100029398	0	3	348,357,732,	0,534,957,
chr14	105931650	105936315	TCONS_00036700	1000	-	105936315	105936315	0	3	715,163,92,	0,1435,4573,
chr14	105931708	105938663	TCONS_00037025	1000	-	105938663	105938663	0	4	657,163,130,79,	0,1377,4515,6876,
chr14	106130040	106133068	TCONS_00038275	1000	+	106133068	106133068	0	2	426,2500,	0,528,
chr14	107632452	107646344	TCONS_00038583	1000	-	107646344	107646344	0	5	176,85,69,394,430,	0,7140,10318,12736,13462,
chr14	107644672	107646273	TCONS_00036025	1000	-	107646273	107646273	0	2	1083,306,	0,1295,
chr14	107644672	107645981	TCONS_00037717	1000	-	107645981	107645981	0	2	1084,14,	0,1295,
chr14	107644811	107646221	TCONS_00036026	1000	-	107646221	107646221	0	2	944,301,	0,1109,
chr14	107644821	107646190	TCONS_00037028	1000	-	107646190	107646190	0	2	761,223,	0,1146,
chr14	107644835	107646203	TCONS_00036027	1000	-	107646203	107646203	0	2	747,283,	0,1085,
chr14	108645053	108651936	TCONS_00035407	1000	+	108651936	108651936	0	2	873,5001,	0,1882,
chr14	108645450	108652333	TCONS_00035408	1000	+	108652333	108652333	0	2	476,5410,	0,1473,
chr15	91179336	91244875	TCONS_00040201	1000	-	91244875	91244875	0	4	1859,194,174,238,	0,8374,9345,65301,
chr15	91180305	91244727	TCONS_00042075	1000	-	91244727	91244727	0	4	890,208,174,90,	0,7405,8376,64332,
chr15	91180796	91244708	TCONS_00039869	1000	-	91244708	91244708	0	3	399,174,71,	0,7885,63841,
chr15	91186274	91244910	TCONS_00039870	1000	-	91244910	91244910	0	3	1630,174,273,	0,2407,58363,
chr15	91186344	91244727	TCONS_00042076	1000	-	91244727	91244727	0	3	1574,174,90,	0,2337,58293,
chr15	18031801	18258192	TCONS_00041148	1000	+	18258192	18258192	0	3	159,49,60,	0,32848,226331,
chr15	18031805	18165871	TCONS_00041569	1000	+	18165871	18165871	0	3	155,49,58,	0,32844,134008,
chr15	18031819	18090471	TCONS_00042102	1000	+	18090471	18090471	0	3	141,49,93,	0,32830,58559,
chr15	18031823	18099376	TCONS_00041942	1000	+	18099376	18099376	0	3	137,49,1001,	0,32826,66552,
chr15	18031841	18098958	TCONS_00040244	1000	+	18098958	18098958	0	4	119,49,83,583,	0,32808,58537,66534,
chr15	53725354	53921071	TCONS_00039168	1000	+	53921071	53921071	0	2	47,211,	0,195506,
chr15	57219007	57421547	TCONS_00041081	1000	-	57421547	57421547	0	4	664,532,150,1112,	0,166381,198303,201428,
chr15	57384499	57460220	TCONS_00042221	1000	-	57460220	57460220	0	7	1421,150,1317,39,62,206,252,	0,32811,35936,37462,38863,72287,75469,
chr15	57384499	57423381	TCONS_00039779	1000	-	57423381	57423381	0	3	1421,150,2482,	0,32811,36400,
chr15	57384503	57423381	TCONS_00041082	1000	-	57423381	57423381	0	4	1417,150,57,19,	0,32807,37192,38859,
chr15	57384505	57419650	TCONS_00040158	1000	-	57419650	57419650	0	2	1415,2340,	0,32805,
chr15	57384507	57455652	TCONS_00039780	1000	-	57455652	57455652	0	5	1413,150,1317,62,27,	0,32803,35928,38855,71118,
chr15	57384537	57460164	TCONS_00040423	1000	-	57460164	57460164	0	7	1383,150,1317,62,1024,206,196,	0,32773,35898,38825,71088,72249,75431,
chr15	62555321	62704932	TCONS_00041809	1000	+	62704932	62704932	0	3	126,360,163,	0,81701,149448,
chr15	62555371	62765259	TCONS_00041619	1000	+	62765259	62765259	0	6	76,360,83,93,110,1978,	0,81651,174258,188257,207686,207910,
chr15	62634647	62763508	TCONS_00041810	1000	+	62763508	62763508	0	6	115,360,83,93,110,227,	0,2375,94982,108981,128410,128634,
chr15	62634730	62765259	TCONS_00041620	1000	+	62765259	62765259	0	5	32,360,83,93,2202,	0,2292,94899,108898,128327,
chr15	8554504	8563582	TCONS_00041564	1000	+	8563582	8563582	0	3	299,152,2129,	0,6109,6949,
chr15	8845485	8866693	TCONS_00038808	1000	+	8866693	8866693	0	3	158,40,5779,	0,325,15429,
chr15	8845508	8898478	TCONS_00041142	1000	+	8898478	8898478	0	4	135,40,41,248,	0,302,15406,52722,
chr15	8845757	8898478	TCONS_00041143	1000	+	8898478	8898478	0	3	93,41,248,	0,15157,52473,
chr15	8845765	8894371	TCONS_00040238	1000	+	8894371	8894371	0	3	85,41,1182,	0,15149,47424,
chr15	8845775	8866887	TCONS_00041939	1000	+	8866887	8866887	0	3	75,41,1556,	0,15139,19556,
chr15	8845781	8863163	TCONS_00038809	1000	+	8863163	8863163	0	2	69,2249,	0,15133,
chr15	8845845	8862024	TCONS_00040488	1000	+	8862024	8862024	0	2	458,1110,	0,15069,
chr15	8846032	8866693	TCONS_00040239	1000	+	8866693	8866693	0	2	194,5779,	0,14882,
chr15	8846060	8892020	TCONS_00038810	1000	+	8892020	8892020	0	3	166,41,758,	0,14854,45202,
chr15	8846091	8865477	TCONS_00041144	1000	+	8865477	8865477	0	3	135,41,146,	0,14823,19240,
chr15	18031831	18065117	TCONS_00038839	1000	+	18065117	18065117	0	2	129,468,	0,32818,
chr15	21879129	21882275	TCONS_00040726	1000	+	21882275	21882275	0	2	1146,1632,	0,1514,
chr15	40659046	40660828	TCONS_00040275	1000	+	40660828	40660828	0	2	229,649,	0,1133,
chr15	40660037	40660641	TCONS_00040377	1000	-	40660641	40660641	0	2	375,119,	0,485,
chr15	44493280	44522357	TCONS_00041273	1000	-	44522357	44522357	0	3	56,151,650,	0,3108,28427,
chr15	45765464	45783173	TCONS_00040390	1000	-	45783173	45783173	0	6	2396,67,93,153,133,627,	0,3994,11452,15958,16761,17082,
chr15	45765464	45783173	TCONS_00040391	1000	-	45783173	45783173	0	6	2396,67,93,83,133,627,	0,3994,11452,16028,16761,17082,
chr15	45780023	45782378	TCONS_00041275	1000	-	45782378	45782378	0	2	1552,153,	0,2202,
chr15	45794731	45808733	TCONS_00040969	1000	+	45808733	45808733	0	3	6198,176,1607,	0,7581,12395,
chr15	45801001	45809691	TCONS_00040282	1000	+	45809691	45809691	0	2	1487,2565,	0,6125,
chr15	46730259	46733204	TCONS_00041382	1000	+	46733204	46733204	0	2	2767,19,	0,2926,
chr15	50933517	50950071	TCONS_00040982	1000	+	50950071	50950071	0	2	16050,84,	0,16470,
chr15	50934306	50953126	TCONS_00040543	1000	+	50953126	50953126	0	2	15874,828,	0,17992,
chr15	50953224	50960039	TCONS_00040762	1000	+	50960039	50960039	0	2	5543,624,	0,6191,
chr15	54934464	54940022	TCONS_00041503	1000	-	54940022	54940022	0	3	577,60,29,	0,950,5529,
chr15	57419111	57460164	TCONS_00040425	1000	-	57460164	57460164	0	5	2641,62,1024,206,196,	0,4251,36514,37675,40857,
chr15	57419133	57460198	TCONS_00041705	1000	-	57460198	57460198	0	4	2619,62,206,230,	0,4229,37653,40835,
chr15	57419133	57455640	TCONS_00041704	1000	-	57455640	57455640	0	2	4291,15,	0,36492,
chr15	57419192	57460207	TCONS_00040424	1000	-	57460207	57460207	0	4	2560,62,1367,239,	0,4170,36433,40776,
chr15	57419511	57460210	TCONS_00041902	1000	-	57460210	57460210	0	3	2241,62,242,	0,3851,40457,
chr15	57419532	57422535	TCONS_00041305	1000	-	57422535	57422535	0	2	2220,574,	0,2429,
chr15	57423227	57460215	TCONS_00040160	1000	-	57460215	57460215	0	3	197,206,247,	0,33559,36741,
chr15	57455562	57460220	TCONS_00039781	1000	-	57460220	57460220	0	3	1087,206,252,	0,1224,4406,
chr15	57456764	57460224	TCONS_00041083	1000	-	57460224	57460224	0	2	228,256,	0,3204,
chr15	58624653	58629713	TCONS_00041707	1000	-	58629713	58629713	0	3	949,124,125,	0,3009,4935,
chr15	58624658	58663050	TCONS_00041307	1000	-	58663050	58663050	0	5	1000,124,127,71,336,	0,3004,4930,6920,38056,
chr15	58624669	58663058	TCONS_00040675	1000	-	58663058	58663058	0	5	933,124,127,71,344,	0,2993,4919,6909,38045,
chr15	60655785	60660619	TCONS_00041088	1000	-	60660619	60660619	0	2	398,51,	0,4783,
chr15	62555321	62556500	TCONS_00039225	1000	+	62556500	62556500	0	2	126,515,	0,664,
chr15	62555371	62638066	TCONS_00041618	1000	+	62638066	62638066	0	2	76,1044,	0,81651,
chr15	65965373	66043488	TCONS_00040570	1000	+	66043488	66043488	0	6	79,86,199,141,308,147,	0,38516,71557,74042,77212,77968,
chr15	71199657	71213798	TCONS_00041101	1000	-	71213798	71213798	0	6	2844,57,88,94,159,67,	0,7479,9124,10239,13608,14074,
chr15	71200091	71214030	TCONS_00040442	1000	-	71214030	71214030	0	6	2410,57,77,106,159,299,	0,7045,8701,9793,13174,13640,
chr15	71201475	71209177	TCONS_00041313	1000	-	71209177	71209177	0	3	1026,57,396,	0,5661,7306,
chr15	71201644	71214463	TCONS_00040902	1000	-	71214463	71214463	0	6	857,57,77,94,159,732,	0,5492,7148,8252,11621,12087,
chr15	71201648	71213799	TCONS_00041314	1000	-	71213799	71213799	0	7	206,95,57,88,94,159,68,	0,758,5488,7133,8248,11617,12083,
chr15	71201649	71209879	TCONS_00042235	1000	-	71209879	71209879	0	4	852,57,88,502,	0,5487,7132,7728,
chr15	71208591	71213796	TCONS_00041723	1000	-	71213796	71213796	0	3	1399,159,65,	0,4674,5140,
chr15	71209351	71214030	TCONS_00039835	1000	-	71214030	71214030	0	2	4073,299,	0,4380,
chr15	81032636	81070393	TCONS_00040191	1000	-	81070393	81070393	0	2	5132,10543,	0,27214,
chr15	81058408	81112848	TCONS_00041724	1000	-	81112848	81112848	0	2	11645,20264,	0,34176,
chr15	91178863	91187742	TCONS_00040456	1000	-	91187742	91187742	0	2	2332,32,	0,8847,
chr15	91179929	91188735	TCONS_00041925	1000	-	91188735	91188735	0	2	1266,54,	0,8752,
chr15	91186210	91190673	TCONS_00040457	1000	-	91190673	91190673	0	3	1549,174,44,	0,2471,4419,
chr15	107357442	107360888	TCONS_00039304	1000	+	107360888	107360888	0	2	558,632,	0,2814,
chr15	107357451	107360914	TCONS_00039303	1000	+	107360914	107360914	0	2	352,658,	0,2805,
chr15	108336563	108344819	TCONS_00041424	1000	+	108344819	108344819	0	2	629,3714,	0,4542,
chr15	108351693	108356789	TCONS_00040222	1000	-	108356789	108356789	0	2	2466,2563,	0,2533,
chr15	108352226	108354246	TCONS_00040463	1000	-	108354246	108354246	0	3	1854,23,7,	0,1923,2013,
chr15	108353348	108356832	TCONS_00041551	1000	-	108356832	108356832	0	2	788,2606,	0,878,
chr15	108354105	108356933	TCONS_00039914	1000	-	108356933	108356933	0	2	67,2695,	0,133,
chr15	108354124	108355840	TCONS_00040702	1000	-	108355840	108355840	0	2	48,1601,	0,115,
chr16	16117075	16239593	TCONS_00043786	1000	-	16239593	16239593	0	3	1068,91,15638,	0,1548,106880,
chr16	20184695	20187828	TCONS_00044876	1000	+	20187828	20187828	0	2	1118,498,	0,2635,
chr16	44347714	44665197	TCONS_00045125	1000	+	44665197	44665197	0	4	438,125,62,4888,	0,157040,244832,312595,
chr16	44504782	44661412	TCONS_00043947	1000	+	44661412	44661412	0	2	97,1103,	0,155527,
chr16	44521920	44665197	TCONS_00045127	1000	+	44665197	44665197	0	3	264,62,4888,	0,70626,138389,
chr16	47575127	47582021	TCONS_00042563	1000	+	47582021	47582021	0	2	3143,1179,	0,5715,
chr16	62114528	62148442	TCONS_00043967	1000	+	62148442	62148442	0	2	530,31342,	0,2572,
chr16	62115962	62148056	TCONS_00045350	1000	+	62148056	62148056	0	2	3978,6158,	0,25936,
chr16	3729239	3732482	TCONS_00044951	1000	-	3732482	3732482	0	2	1797,771,	0,2472,
chr16	3729241	3732412	TCONS_00045396	1000	-	3732412	3732412	0	2	1855,701,	0,2470,
chr16	34376166	34379293	TCONS_00044084	1000	-	34379293	34379293	0	2	1048,1335,	0,1792,
chr16	62622152	62632915	TCONS_00043164	1000	-	62632915	62632915	0	5	1685,2167,103,103,711,	0,2592,7505,8099,10052,
chr16	62622645	62630067	TCONS_00044337	1000	-	62630067	62630067	0	4	1192,2005,80,410,	0,2099,4186,7012,
chr16	62624119	62630067	TCONS_00044338	1000	-	62630067	62630067	0	3	879,80,410,	0,2712,5538,
chr16	65984247	65987295	TCONS_00043725	1000	+	65987295	65987295	0	2	1167,46,	0,3002,
chr16	72497741	72536385	TCONS_00045845	1000	-	72536385	72536385	0	2	72,1526,	0,37118,
chr16	77536704	77544784	TCONS_00043995	1000	+	77544784	77544784	0	2	746,340,	0,7740,
chr16	81124241	81128238	TCONS_00045480	1000	-	81128238	81128238	0	4	1213,96,383,66,	0,1623,2976,3931,
chr16	81124582	81128697	TCONS_00044125	1000	-	81128697	81128697	0	2	1378,1480,	0,2635,
chr16	81124582	81128235	TCONS_00043618	1000	-	81128235	81128235	0	3	1378,383,63,	0,2635,3590,
chr16	81124801	81128213	TCONS_00043291	1000	-	81128213	81128213	0	4	1159,136,160,41,	0,2416,2639,3371,
chr16	81124837	81128683	TCONS_00044823	1000	-	81128683	81128683	0	4	1123,136,160,330,	0,2380,2603,3516,
chr16	81124933	81128227	TCONS_00043290	1000	-	81128227	81128227	0	3	1027,613,55,	0,2284,3239,
chr16	81124937	81128823	TCONS_00045045	1000	-	81128823	81128823	0	2	2663,508,	0,3378,
chr16	81124937	81128823	TCONS_00045047	1000	-	81128823	81128823	0	4	1023,136,160,508,	0,2280,2503,3378,
chr16	81124937	81128823	TCONS_00045046	1000	-	81128823	81128823	0	4	1023,136,161,508,	0,2280,2502,3378,
chr16	81124941	81128705	TCONS_00043619	1000	-	81128705	81128705	0	3	1019,383,352,	0,2276,3412,
chr16	81124941	81128560	TCONS_00045661	1000	-	81128560	81128560	0	2	2412,1120,	0,2499,
chr16	81126018	81128697	TCONS_00044126	1000	-	81128697	81128697	0	2	1582,344,	0,2335,
chr16	85018206	85039267	TCONS_00044717	1000	+	85039267	85039267	0	3	1249,2535,6179,	0,10484,14882,
chr16	85159791	85167662	TCONS_00045386	1000	+	85167662	85167662	0	2	1204,4039,	0,3832,
chr16	85162875	85166297	TCONS_00043753	1000	+	85166297	85166297	0	3	852,2236,53,	0,1025,3369,
chr16	85188094	85193002	TCONS_00045569	1000	+	85193002	85193002	0	2	2477,2304,	0,2604,
chr16	85255229	85278625	TCONS_00045574	1000	+	85278625	85278625	0	2	5181,18131,	0,5265,
chr17	18465275	18483673	TCONS_00046926	1000	+	18483673	18483673	0	2	383,9789,	0,8609,
chr17	29088938	29140202	TCONS_00047516	1000	-	29140202	29140202	0	5	18,100,147,74,1894,	0,1179,9106,46558,49370,
chr17	60210365	60449278	TCONS_00047942	1000	-	60449278	60449278	0	2	372,539,	0,238374,
chr17	89516304	89522423	TCONS_00048181	1000	-	89522423	89522423	0	2	4117,1378,	0,4741,
chr17	89516304	89522423	TCONS_00048182	1000	-	89522423	89522423	0	2	4169,1378,	0,4741,
chr17	89516304	89522423	TCONS_00048183	1000	-	89522423	89522423	0	3	4169,52,1378,	0,4481,4741,
chr17	5993777	5994609	TCONS_00046412	1000	-	5994609	5994609	0	2	707,23,	0,809,
chr17	8044762	8052808	TCONS_00048079	1000	-	8052808	8052808	0	3	721,91,627,	0,1837,7419,
chr17	8062943	8068263	TCONS_00047887	1000	-	8068263	8068263	0	2	262,226,	0,5094,
chr17	10681715	10683481	TCONS_00048306	1000	-	10683481	10683481	0	2	22,1393,	0,373,
chr17	12445581	12448084	TCONS_00046460	1000	-	12448084	12448084	0	2	1485,162,	0,2341,
chr17	12583861	12587664	TCONS_00047797	1000	+	12587664	12587664	0	2	110,3470,	0,333,
chr17	17094057	17157931	TCONS_00046917	1000	+	17157931	17157931	0	3	122,249,114,	0,60123,63760,
chr17	17094058	17144443	TCONS_00047177	1000	+	17144443	17144443	0	2	121,2421,	0,47964,
chr17	17140884	17144714	TCONS_00045996	1000	+	17144714	17144714	0	2	260,2692,	0,1138,
chr17	18802361	18813923	TCONS_00048215	1000	+	18813923	18813923	0	2	2679,291,	0,11271,
chr17	22991400	23001183	TCONS_00046042	1000	+	23001183	23001183	0	3	144,138,1187,	0,3090,8596,
chr17	22991503	23001296	TCONS_00046040	1000	+	23001296	23001296	0	2	41,1300,	0,8493,
chr17	25754089	25779223	TCONS_00048423	1000	+	25779223	25779223	0	2	2828,128,	0,25006,
chr17	25754977	25780859	TCONS_00047812	1000	+	25780859	25780859	0	2	1940,396,	0,25486,
chr17	29038559	29088874	TCONS_00047515	1000	-	29088874	29088874	0	4	632,87,81,23,	0,1401,23671,50292,
chr17	31550154	31554492	TCONS_00048020	1000	+	31554492	31554492	0	2	116,879,	0,3459,
chr17	39365123	39369534	TCONS_00048870	1000	-	39369534	39369534	0	3	1214,535,1207,	0,1769,3204,
chr17	39365123	39367965	TCONS_00048869	1000	-	39367965	39367965	0	2	1214,1073,	0,1769,
chr17	39472739	39481921	TCONS_00047534	1000	-	39481921	39481921	0	2	41,3515,	0,5667,
chr17	52298330	52304221	TCONS_00046670	1000	-	52304221	52304221	0	2	1340,380,	0,5511,
chr17	52298330	52304221	TCONS_00047318	1000	-	52304221	52304221	0	3	1016,122,380,	0,1218,5511,
chr17	52298823	52304320	TCONS_00047936	1000	-	52304320	52304320	0	3	523,122,760,	0,725,4737,
chr17	55331059	55337325	TCONS_00047434	1000	+	55337325	55337325	0	3	5679,93,339,	0,5741,5927,
chr17	55331097	55336932	TCONS_00048250	1000	+	55336932	55336932	0	3	5390,93,101,	0,5579,5734,
chr17	62659820	62663809	TCONS_00049056	1000	-	62663809	62663809	0	2	2179,806,	0,3183,
chr17	62659962	62663809	TCONS_00047944	1000	-	62663809	62663809	0	2	2036,651,	0,3196,
chr17	76481099	76505962	TCONS_00046791	1000	-	76505962	76505962	0	2	16462,8227,	0,16636,
chr17	79701574	79712075	TCONS_00048166	1000	-	79712075	79712075	0	3	1398,499,5922,	0,4002,4579,
chr17	79702231	79710496	TCONS_00047356	1000	-	79710496	79710496	0	2	741,4920,	0,3345,
chr17	79742888	79747787	TCONS_00046810	1000	-	79747787	79747787	0	2	3483,1301,	0,3598,
chr17	89517381	89520927	TCONS_00047133	1000	-	89520927	89520927	0	2	3040,90,	0,3456,
chr17	89517381	89520927	TCONS_00047134	1000	-	89520927	89520927	0	2	3092,90,	0,3456,
chr17	89517381	89520927	TCONS_00047135	1000	-	89520927	89520927	0	2	3092,142,	0,3404,
chr17	89517381	89520913	TCONS_00047132	1000	-	89520913	89520913	0	2	3092,24,	0,3508,
chr17	89845217	89851783	TCONS_00046365	1000	+	89851783	89851783	0	2	380,812,	0,5754,
chr18	20907206	20994440	TCONS_00051843	1000	+	20994440	20994440	0	4	74,1574,153,388,	0,12399,25599,86846,
chr18	20919437	20994440	TCONS_00051844	1000	+	20994440	20994440	0	3	1742,153,388,	0,13368,74615,
chr18	62898294	63021067	TCONS_00049440	1000	+	63021067	63021067	0	3	42,89,1041,	0,63387,121732,
chr18	62898611	63020958	TCONS_00051715	1000	+	63020958	63020958	0	3	43,89,932,	0,63070,121415,
chr18	18214223	18249775	TCONS_00050763	1000	+	18249775	18249775	0	6	208,134,169,112,173,213,	0,18289,32568,34388,34629,35339,
chr18	18248560	18371021	TCONS_00051315	1000	+	18371021	18371021	0	4	163,173,282,382,	0,292,1002,122079,
chr18	70740119	70865947	TCONS_00051379	1000	+	70865947	70865947	0	2	1435,792,	0,125036,
chr18	70740179	70865966	TCONS_00050995	1000	+	70865966	70865966	0	2	1450,757,	0,125030,
chr18	70744880	70866021	TCONS_00049480	1000	+	70866021	70866021	0	2	1011,438,	0,120703,
chr18	71016302	71042263	TCONS_00051897	1000	+	71042263	71042263	0	4	42,124,996,227,	0,2235,3301,25734,
chr18	71016588	71042096	TCONS_00051559	1000	+	71042096	71042096	0	4	58,124,996,60,	0,1949,3015,25448,
chr18	71016813	71042441	TCONS_00050366	1000	+	71042441	71042441	0	4	108,124,996,405,	0,1724,2790,25223,
chr18	71019387	71042399	TCONS_00050596	1000	+	71042399	71042399	0	2	1212,363,	0,22649,
chr18	80964288	81025126	TCONS_00051200	1000	+	81025126	81025126	0	5	439,150,65,170,203,	0,28575,28902,29295,60635,
chr18	80992717	81003800	TCONS_00051732	1000	+	81003800	81003800	0	4	296,65,170,178,	0,473,866,10905,
chr18	80992864	81125343	TCONS_00051008	1000	+	81125343	81125343	0	4	149,563,89,45,	0,326,57194,132434,
chr18	80993713	81004924	TCONS_00051201	1000	+	81004924	81004924	0	2	40,1302,	0,9909,
chr18	18169925	18214410	TCONS_00050273	1000	+	18214410	18214410	0	3	119,193,215,	0,16189,44270,
chr18	18226180	18249988	TCONS_00051125	1000	+	18249988	18249988	0	7	78,127,134,139,169,173,426,	0,5438,6332,7385,20611,22672,23382,
chr18	18231629	18273602	TCONS_00050936	1000	+	18273602	18273602	0	6	116,134,169,173,282,101,	0,883,15162,17223,17933,41872,
chr18	18231629	18273602	TCONS_00050937	1000	+	18273602	18273602	0	8	116,134,69,169,112,173,282,101,	0,883,2006,15162,16982,17223,17933,41872,
chr18	18231630	18249828	TCONS_00051497	1000	+	18249828	18249828	0	6	115,134,69,169,173,266,	0,882,2005,15161,17222,17932,
chr18	18231630	18249828	TCONS_00051498	1000	+	18249828	18249828	0	6	115,134,169,112,173,266,	0,882,15161,16981,17222,17932,
chr18	18246391	18249988	TCONS_00050765	1000	+	18249988	18249988	0	4	569,112,173,426,	0,2220,2461,3171,
chr18	20864630	20921282	TCONS_00051126	1000	+	20921282	20921282	0	3	131,103,1677,	0,2320,54975,
chr18	20907203	20921282	TCONS_00051499	1000	+	20921282	20921282	0	2	77,1677,	0,12402,
chr18	20920022	20921714	TCONS_00051986	1000	+	20921714	20921714	0	2	1157,23,	0,1669,
chr18	20992216	20998996	TCONS_00051318	1000	+	20998996	20998996	0	3	2121,48,272,	0,5424,6508,
chr18	21931270	21932476	TCONS_00049625	1000	-	21932476	21932476	0	2	150,77,	0,1129,
chr18	24744483	24749090	TCONS_00051670	1000	+	24749090	24749090	0	2	337,3090,	0,1517,
chr18	25387085	25388712	TCONS_00050525	1000	+	25388712	25388712	0	2	37,1482,	0,145,
chr18	27721760	27727000	TCONS_00049223	1000	+	27727000	27727000	0	2	509,4681,	0,559,
chr18	28463448	28468235	TCONS_00050661	1000	-	28468235	28468235	0	4	2330,157,283,45,	0,3975,4309,4742,
chr18	28463805	28490395	TCONS_00050429	1000	-	28490395	28490395	0	4	1973,157,684,63,	0,3618,3952,26527,
chr18	28463805	28468566	TCONS_00049675	1000	-	28468566	28468566	0	3	1973,157,809,	0,3618,3952,
chr18	28776871	28790667	TCONS_00050533	1000	+	28790667	28790667	0	2	637,40,	0,13756,
chr18	36994469	37076808	TCONS_00050676	1000	-	37076808	37076808	0	2	2150,628,	0,81711,
chr18	40174118	40213604	TCONS_00050305	1000	+	40213604	40213604	0	2	58,1488,	0,37998,
chr18	40174127	40213505	TCONS_00051145	1000	+	40213505	40213505	0	3	49,761,1548,	0,35378,37830,
chr18	40174137	40213604	TCONS_00050787	1000	+	40213604	40213604	0	2	39,1647,	0,37820,
chr18	40174143	40213603	TCONS_00050306	1000	+	40213603	40213603	0	2	33,4098,	0,35362,
chr18	45224189	45236572	TCONS_00051344	1000	+	45236572	45236572	0	2	360,2190,	0,10193,
chr18	45224189	45236572	TCONS_00052006	1000	+	45236572	45236572	0	3	360,104,1157,	0,10193,11226,
chr18	45233445	45244340	TCONS_00050544	1000	+	45244340	45244340	0	2	2101,1714,	0,9181,
chr18	45233739	45243489	TCONS_00051151	1000	+	45243489	45243489	0	3	747,131,863,	0,1676,8887,
chr18	45233888	45254679	TCONS_00049318	1000	+	45254679	45254679	0	2	1658,317,	0,20474,
chr18	45234001	45237811	TCONS_00051690	1000	+	45237811	45237811	0	2	485,2396,	0,1414,
chr18	48713091	48742406	TCONS_00051610	1000	-	48742406	48742406	0	2	1413,122,	0,29193,
chr18	56200290	56217967	TCONS_00050890	1000	-	56217967	56217967	0	4	879,150,109,214,	0,3389,5567,17463,
chr18	56204826	56217935	TCONS_00051252	1000	-	56217935	56217935	0	2	1140,182,	0,12927,
chr18	60386495	60390054	TCONS_00049845	1000	-	60390054	60390054	0	3	1466,331,347,	0,2236,3212,
chr18	60386530	60389377	TCONS_00050898	1000	-	60389377	60389377	0	2	1431,646,	0,2201,
chr18	60386872	60392042	TCONS_00050714	1000	-	60392042	60392042	0	4	114,536,331,428,	0,553,1859,4742,
chr18	60387112	60392042	TCONS_00050715	1000	-	60392042	60392042	0	4	114,536,331,428,	0,313,1619,4502,
chr18	60387391	60392028	TCONS_00050202	1000	-	60392028	60392028	0	3	570,1187,414,	0,1340,4223,
chr18	60387391	60392028	TCONS_00050203	1000	-	60392028	60392028	0	4	570,331,912,414,	0,1340,2316,4223,
chr18	60387391	60390817	TCONS_00050201	1000	-	60390817	60390817	0	3	570,1187,810,	0,1340,2616,
chr18	60388655	60392042	TCONS_00050716	1000	-	60392042	60392042	0	2	408,428,	0,2959,
chr18	60389701	60392042	TCONS_00049847	1000	-	60392042	60392042	0	2	217,428,	0,1913,
chr18	63199353	63200313	TCONS_00050579	1000	+	63200313	63200313	0	2	748,104,	0,856,
chr18	63199371	63202981	TCONS_00050066	1000	+	63202981	63202981	0	2	724,2772,	0,838,
chr18	63199386	63200072	TCONS_00051374	1000	+	63200072	63200072	0	2	454,114,	0,572,
chr18	69870488	69872815	TCONS_00050219	1000	-	69872815	69872815	0	2	1697,216,	0,2111,
chr18	69870583	69872045	TCONS_00051808	1000	-	69872045	69872045	0	2	1324,21,	0,1441,
chr18	69871133	69872819	TCONS_00051638	1000	-	69872819	69872819	0	2	1052,398,	0,1288,
chr18	75120998	75122205	TCONS_00049924	1000	-	75122205	75122205	0	2	388,458,	0,749,
chr18	80964703	80995109	TCONS_00051396	1000	+	80995109	80995109	0	4	24,148,65,1526,	0,28162,28487,28880,
chr18	81049295	81129236	TCONS_00051905	1000	+	81129236	81129236	0	3	852,157,1136,	0,76003,78805,
chr18	81049295	81125346	TCONS_00051904	1000	+	81125346	81125346	0	3	852,153,48,	0,53325,76003,
chr18	81102610	81128474	TCONS_00051733	1000	+	81128474	81128474	0	3	163,157,374,	0,22688,25490,
chr18	81116501	81128984	TCONS_00050091	1000	+	81128984	81128984	0	3	114,157,884,	0,8797,11599,
chr18	85015814	85023600	TCONS_00050924	1000	-	85023600	85023600	0	2	2724,605,	0,7181,
chr19	34314860	34343123	TCONS_00054469	1000	-	34343123	34343123	0	3	223,1083,67,	0,1407,28196,
chr19	34314878	34378797	TCONS_00054835	1000	-	34378797	34378797	0	3	205,1083,151,	0,1389,63768,
chr19	31559879	31569941	TCONS_00054666	1000	-	31569941	31569941	0	3	226,768,816,	0,8276,9246,
chr19	31567888	31569417	TCONS_00053442	1000	-	31569417	31569417	0	2	1035,292,	0,1237,
chr19	33824682	33830519	TCONS_00052244	1000	+	33830519	33830519	0	5	117,49,156,111,3063,	0,631,1685,2396,2774,
chr19	33824686	33831013	TCONS_00052245	1000	+	33831013	33831013	0	4	113,156,111,3557,	0,1681,2392,2770,
chr19	33826285	33830794	TCONS_00052246	1000	+	33830794	33830794	0	3	238,111,3338,	0,793,1171,
chr19	34626680	34638680	TCONS_00052720	1000	-	34638680	34638680	0	2	650,235,	0,11765,
chr19	34626790	34698782	TCONS_00053451	1000	-	34698782	34698782	0	3	540,151,114,	0,32405,71878,
chr19	36149965	36152027	TCONS_00054073	1000	-	36152027	36152027	0	2	1256,102,	0,1960,
chr19	36773652	36778248	TCONS_00053335	1000	+	36778248	36778248	0	2	2405,149,	0,4447,
chr19	37242752	37245894	TCONS_00053466	1000	-	37245894	37245894	0	2	581,415,	0,2727,
chr19	42690951	42699004	TCONS_00054491	1000	-	42699004	42699004	0	3	1098,91,22,	0,1199,8031,
chr19	56679090	56682509	TCONS_00053130	1000	+	56682509	56682509	0	2	66,2650,	0,769,
chr19	56681688	56684889	TCONS_00053374	1000	+	56684889	56684889	0	2	1350,50,	0,3151,
chr19	65837393	65840346	TCONS_00053522	1000	-	65840346	65840346	0	2	1759,607,	0,2346,
chr19	65838801	65841914	TCONS_00054884	1000	-	65841914	65841914	0	3	351,120,717,	0,938,2396,
chr19	66131835	66138195	TCONS_00054887	1000	-	66138195	66138195	0	2	3778,2451,	0,3909,
chr19	66252380	66274590	TCONS_00053744	1000	-	66274590	66274590	0	2	1990,524,	0,21686,
chr19	69550158	69557381	TCONS_00054899	1000	-	69557381	69557381	0	2	5521,1582,	0,5641,
chr19	69550158	69557381	TCONS_00054900	1000	-	69557381	69557381	0	2	5215,1608,	0,5615,
chr19	69554854	69556998	TCONS_00055201	1000	-	69556998	69556998	0	3	657,22,1265,	0,737,879,
chr19	69554854	69556832	TCONS_00053539	1000	-	69556832	69556832	0	2	545,993,	0,985,
chr19	69554899	69556786	TCONS_00053752	1000	-	69556786	69556786	0	2	612,995,	0,892,
chr19	69554899	69556786	TCONS_00053753	1000	-	69556786	69556786	0	2	492,995,	0,892,
chr19	69554899	69556786	TCONS_00053754	1000	-	69556786	69556786	0	2	492,955,	0,932,
chr19	69554912	69559073	TCONS_00054341	1000	-	69559073	69559073	0	4	461,26,27,3287,	0,541,767,874,
chr19	69554931	69557447	TCONS_00054724	1000	-	69557447	69557447	0	2	402,1994,	0,522,
chr19	69555568	69556660	TCONS_00053284	1000	-	69556660	69556660	0	2	23,789,	0,303,
chr20	12842576	12854496	TCONS_00063530	1000	+	12854496	12854496	0	2	2778,9011,	0,2909,
chr20	22086730	22156816	TCONS_00065977	1000	+	22156816	22156816	0	3	909,164,556,	0,57062,69530,
chr20	33028794	33031003	TCONS_00064869	1000	+	33031003	33031003	0	2	513,1517,	0,692,
chr20	4236985	4239469	TCONS_00065003	1000	+	4239469	4239469	0	2	125,1513,	0,971,
chr20	4473830	4479589	TCONS_00065473	1000	-	4479589	4479589	0	2	653,579,	0,5180,
chr20	4491097	4494326	TCONS_00066156	1000	-	4494326	4494326	0	2	1367,144,	0,3085,
chr20	4491111	4494206	TCONS_00066010	1000	-	4494206	4494206	0	3	607,206,24,	0,1147,3071,
chr20	5792576	5797003	TCONS_00064295	1000	+	5797003	5797003	0	2	107,3717,	0,710,
chr20	9084967	9096068	TCONS_00063963	1000	-	9096068	9096068	0	3	2829,103,439,	0,4941,10662,
chr20	9086219	9090048	TCONS_00064926	1000	-	9090048	9090048	0	2	1577,140,	0,3689,
chr20	9086219	9090048	TCONS_00065142	1000	-	9090048	9090048	0	2	1624,140,	0,3689,
chr20	10269978	10296574	TCONS_00064445	1000	-	10296574	10296574	0	3	149,232,679,	0,15828,25917,
chr20	12899955	12901764	TCONS_00065778	1000	+	12901764	12901764	0	3	68,138,1435,	0,147,374,
chr20	15892461	15895503	TCONS_00064599	1000	+	15895503	15895503	0	2	109,2445,	0,597,
chr20	15892462	15897278	TCONS_00064838	1000	+	15897278	15897278	0	2	108,3507,	0,1309,
chr20	15892476	15897676	TCONS_00064839	1000	+	15897676	15897676	0	3	94,170,3377,	0,1295,1823,
chr20	15892524	15897676	TCONS_00065611	1000	+	15897676	15897676	0	4	46,883,294,2092,	0,534,1775,3060,
chr20	15892779	15895503	TCONS_00064600	1000	+	15895503	15895503	0	3	856,115,1204,	0,992,1520,
chr20	15892918	15897676	TCONS_00064361	1000	+	15897676	15897676	0	2	717,3905,	0,853,
chr20	15892964	15897129	TCONS_00064360	1000	+	15897129	15897129	0	3	671,170,2830,	0,807,1335,
chr20	22086686	22145009	TCONS_00065261	1000	+	22145009	22145009	0	3	23,449,1217,	0,504,57106,
chr20	22086796	22091278	TCONS_00063617	1000	+	22091278	22091278	0	2	843,628,	0,3854,
chr20	25114867	25117780	TCONS_00064101	1000	-	25117780	25117780	0	2	591,224,	0,2689,
chr20	30292561	30312073	TCONS_00064867	1000	+	30312073	30312073	0	2	678,40,	0,19472,
chr20	31275405	31278562	TCONS_00065889	1000	-	31278562	31278562	0	3	1585,217,164,	0,1884,2993,
chr20	31276100	31278527	TCONS_00065171	1000	-	31278527	31278527	0	4	890,217,44,129,	0,1189,1570,2298,
chr20	31276100	31277583	TCONS_00064485	1000	-	31277583	31277583	0	2	890,294,	0,1189,
chr20	31276131	31278464	TCONS_00064963	1000	-	31278464	31278464	0	3	859,219,66,	0,1156,2267,
chr20	31481056	31482508	TCONS_00065445	1000	+	31482508	31482508	0	2	327,957,	0,495,
chr20	33523961	33525640	TCONS_00066137	1000	+	33525640	33525640	0	2	552,1015,	0,664,
chr20	33524118	33526545	TCONS_00065082	1000	+	33526545	33526545	0	3	33,129,1932,	0,266,495,
chr20	33524124	33527566	TCONS_00065631	1000	+	33527566	33527566	0	4	27,129,1220,467,	0,260,489,2975,
chr20	33524162	33527396	TCONS_00064632	1000	+	33527396	33527396	0	2	351,2783,	0,451,
chr20	33524171	33528629	TCONS_00065806	1000	+	33528629	33528629	0	3	76,129,4016,	0,213,442,
chr20	33524179	33528629	TCONS_00064633	1000	+	33528629	33528629	0	3	100,129,4016,	0,205,434,
chr20	33524180	33531803	TCONS_00063685	1000	+	33531803	33531803	0	4	67,129,4241,2777,	0,204,433,4846,
chr20	50387545	50402150	TCONS_00066151	1000	+	50402150	50402150	0	2	1393,2184,	0,12421,
